# Supplementary material for: Transcriptomic Characterization of Endometrioid, Clear Cell, and High-Grade Serous Epithelial Ovarian Carcinoma
Source: Oxford University Press journal article supplement (doi:10.1158/1055-9965.epi-17-0728), 2018-07-02
Supplement: 10559965epi170728-sup-187479_3_supp_4617636_p5bqpk.xlsx [file 10559965epi170728-sup-187479_3_supp_4617636_p5bqpk.xlsx]

## Sheet: Supp Table 1
Supplemental Table 1: Characteristics of patients with clear cell, endometrioid and high-grade serous ovarian carcinoma
Variable	Levels	CC(N = 19)	EC (N = 55)	HGSC (N=112)	p-value*
Age at Diagnosis	mean(Age)	58.4 (9.8)	58.3 (12.9)	63.7 (11.7)	0.012
Stage	I/II	15	38	13	4.4e-16
	III/IV	4	17	99
Vital Status	Alive	10	39	29	1.3e-07
	Deceased	9	16	83
Progression Status	No progression	11	47	39	7.202e-09
	Progression	8	8	66
	unknown	0	0	7
Debulking Status	optimal	19	52	94	0.101
	sub-optimal	0	2	15
	unknown	0	1	1
Taxane	No	2	1	6	0.46
	Yes	16	35	84
	unknown	1	19	22
Platinum	No	2	1	3	0.3
	Yes	16	35	87
	unknown	1	19	22
Grade	Low	0	17	0	3.4e-10
	High	19	38	112
Batch	1	0	30	61	<1.0E-07
	2	12	2	2
	3	7	22	1
	4	0	1	48
*Tests completed using either Chi-square Test (Fisher's Exact Test) or ANOVA.

## Sheet: Supp Table 2 Batch
Supplementary Table 2: Information on 4 RNA-seq batches
Batch	Library Preparation	RNA selection	Sequencing Center	Read Length	Number of Samples	Number of HGSC	Number of CC	Number of EC
1	TruSeq Stranded Total RNA Library Preparation Kit	Total RNA, rRNA depleted	BGI Americas (Beijing, China)	101	91	61	0	30
2	TruSeq RNA Library Preparation Kit v2	mRNA	Epigenome Core, University of South California (Los Angeles, CA)	50	16	2	12	2
3	TruSeq Stranded Total RNA Library Preparation Kit	Total RNA, rRNA depleted	Medical Genome Facility, Mayo Clinic (Rochester, MN)	101	30	1	7	22
4	TruSeq RNA Library Preparation Kit v2	mRNA	Medical Genome Facility, Mayo Clinic (Rochester, MN)	101	49	48	0	1

## Sheet: Supp Table 3 GEO studies
Supplemental Table 3: Summary of the 8 replication datasets from GEO with more than one EOC histology
Study	First Author	No. Tumors	No. Serous*	No. EC	No. CC	Years Tumors Collected	Outcome	Covariates	Notes
GSE51088	Karlan	109	100	6	3	1989-2005	OS	Stage
GSE44104	Wu	51	28	11	12	2002-2010	No outcomes
GSE26193	Mateescu	93	79	8	6	1989-2005	OS & PFS	Stage
GSE2109	IGC's Expression Project for Oncology	118	81	28	9	Unknown (no publication)	No outcomes
GSE6008	Schwartz; Wu; Bommer	86	41	37	8	Unknown (not mentioned in publications)	No outcomes
GSE9891	Tothill	266	246	20	0	1992-2006	OS & PFS	Stage
GSE14764	Denkert	76	68	6	2	2000-2004	OS		Removed CC from outcome analysis
GSE30161	Ferriss	53	47	1	5	1995-2004	OS & PFS		Removed EC from outcome analysis
*not restricted to high-grade serous

## Sheet: Supp Table 4 Cluster x Hist
Supplemental Table 4: Cross-tabs of Cluster Assignment from mclust by histotype and Cross-tabs of Cluster Assignment by CLOVAR signature
	Histotype
Cluster Assignment	HGS	EC	CC	Total
1	2	40	0	42
2	1	8	11	20
3	53	2	0	55
4	41	5	0	46
5	15	0	8	23
Total	112	55	19	186
	CLOVAR assignment
Cluster Assignment	DIF	IMM	MES	PRO
1	9	11	8	14
2	7	7	3	3
3	11	9	18	17
4	17	11	11	7
5	15	1	3	4
ONLY HGSC Tumors	CLOVAR assignment
Cluster Assignment	DIF	IMM	MES	PRO
1	0	1	1	0
2	1	0	0	0
3	11	8	18	16
4	14	9	11	7
5	10	1	0	4

## Sheet: Supp Table 5 1254 DE genes,Mayo
Supplemental Table 5: Results for 1,254 differentially expressed genes with KW p < 10-10 in Mayo Clinic Study
			Mean Normalized Abundances		Kruskal-Wallis Test		Pairwise Wilconxin Tests
Gene	Ensembl ID	HGS	EC	CC	p-value	q-value	HGS-EC p	HGS-EC q	HGS-CC p	HGS-CC q	EC-CC p	EC-CC q	Gene.type	EntrezGene.ID
KIAA1324	ENSG00000116299	1116.93	3612.32	-996.788	1.66e-18	5.79e-17	9.96e-12	2.04e-10	2.5e-10	3.94e-09	4.66e-10	2.32e-08	protein_coding	57535
C12orf75	ENSG00000235162	1963.56	661.316	9382.32	1.49e-14	1.65e-13	2.98e-06	1.32e-05	4.65e-11	1.4e-09	5.9e-10	2.55e-08	protein_coding	387882
SLC3A1	ENSG00000138079	380.318	126.44	2363.74	1.36e-13	1.13e-12	2.24e-05	7.68e-05	8.2e-11	1.98e-09	1.1e-09	3.59e-08	protein_coding	6519
MAP2K6	ENSG00000108984	367.459	977.097	239.16	1.41e-13	1.16e-12	6.08e-13	1.79e-11	0.058901	0.0277772	3.55e-07	2.46e-06	protein_coding	5608
PPP1R3B	ENSG00000173281	1461.83	799.43	6511.15	1.44e-13	1.17e-12	0.000217241	0.000557367	2.19e-11	1.02e-09	1.79e-10	2.17e-08	protein_coding	79660
GABARAPL1	ENSG00000139112	1643.31	985.47	9611.72	4.85e-13	3.33e-12	0.001523	0.0029505	1.83e-11	9.33e-10	1.29e-10	2.17e-08	protein_coding	23710
DLX6-AS1	ENSG00000231764	171.148	885.27	585.044	1.3e-12	7.9e-12	1.04e-11	2.13e-10	2.03e-05	3.05e-05	0.218252	0.15005	antisense
LAMB1	ENSG00000091136	5670.01	3168.5	29520.8	2.35e-12	1.31e-11	0.0125592	0.0170939	1.6e-11	9.05e-10	1.65e-10	2.17e-08	protein_coding	3912
GLRX	ENSG00000173221	559.287	349.984	4808.66	2.63e-12	1.44e-11	0.0690045	0.0661154	4.26e-12	9.05e-10	1.01e-10	2.17e-08	protein_coding	2745
ATP6V0A1	ENSG00000033627	936.267	1052.98	2396.65	2.79e-12	1.51e-11	0.0223183	0.027319	8.87e-12	9.05e-10	2.27e-10	2.17e-08	protein_coding	535
TSPAN1	ENSG00000117472	3064.83	1629.42	11968.6	3.07e-12	1.62e-11	0.000154821	0.000415971	8.74e-10	9.52e-09	1.62e-09	4.54e-08	protein_coding	10103
ANXA4	ENSG00000196975	4733.34	3058.72	32385	3.28e-12	1.71e-11	0.0535124	0.054238	7.74e-12	9.05e-10	1.01e-10	2.17e-08	protein_coding	307
UPK3B	ENSG00000276184	296.623	1416.39	1380.98	4.36e-12	2.16e-11	1.35e-11	2.67e-10	8.56e-05	0.000102788	0.325256	0.199937	protein_coding	80761
UPK3B	ENSG00000276184	296.623	1416.39	1380.98	4.36e-12	2.16e-11	1.35e-11	2.67e-10	8.56e-05	0.000102788	0.325256	0.199937	protein_coding	105375355
CYB5R3	ENSG00000100243	2511.63	2714.87	8535.9	5.98e-12	2.83e-11	0.213902	0.154731	4.89e-12	9.05e-10	1.01e-10	2.17e-08	protein_coding	1727
CDH1	ENSG00000039068	7245.48	6141.53	20516.8	8.19e-12	3.63e-11	0.0338835	0.0379633	1.83e-11	9.33e-10	4.66e-10	2.32e-08	protein_coding	999
ENTPD5	ENSG00000187097	670.425	638.347	2033.83	1.18e-11	4.9e-11	0.785301	0.375239	5.62e-12	9.05e-10	1.01e-10	2.17e-08	protein_coding	957
GPX3	ENSG00000211445	11658.1	8328.5	98645.2	1.24e-11	5.09e-11	0.522054	0.287681	7.39e-12	9.05e-10	1.01e-10	2.17e-08	protein_coding	2878
RHOB	ENSG00000143878	4443.25	5020.35	21197	1.68e-11	6.56e-11	0.201616	0.148207	8.87e-12	9.05e-10	5.9e-10	2.55e-08	protein_coding	388
FLOT1	ENSG00000236271	55.8531	-4.68644	74.5416	1.68e-11	6.56e-11	3.44e-11	6.25e-10	0.121369	0.0512005	3.38e-06	1.58e-05	protein_coding	10211
EIF1	ENSG00000173812	7634.97	9522.99	14592.9	2.5e-11	8.9e-11	1.5e-06	7.29e-06	3.21e-08	1.44e-07	1.37e-05	5.07e-05	protein_coding	10209
FERMT2	ENSG00000073712	1627.44	1350.73	3933.82	2.93e-11	1.02e-10	0.0514402	0.052581	2.2e-10	3.7e-09	1.01e-10	2.17e-08	protein_coding	10979
IGSF3	ENSG00000143061	1000.12	1014.85	4917.27	2.97e-11	1.03e-10	0.480884	0.272503	8.48e-12	9.05e-10	7.46e-10	2.91e-08	protein_coding	3321
MITF	ENSG00000187098	421.993	408.807	1964.34	3.07e-11	1.06e-10	0.705445	0.350253	1.46e-11	9.05e-10	2.27e-10	2.17e-08	protein_coding	4286
SLC22A5	ENSG00000197375	378.578	345.586	1001.47	3.74e-11	1.26e-10	0.326738	0.208754	3.41e-11	1.22e-09	2.1e-10	2.17e-08	protein_coding	6584
GNS	ENSG00000135677	6234.93	7616.31	16582	3.75e-11	1.27e-10	0.00409687	0.0067373	2.3e-10	3.78e-09	1.62e-08	2.16e-07	protein_coding	2799
TALDO1	ENSG00000177156	2892.57	3553.49	6045.92	3.88e-11	1.3e-10	9.66e-05	0.000275464	2.51e-09	2.02e-08	5.58e-07	3.51e-06	protein_coding	6888
SESTD1	ENSG00000187231	956.206	1083.5	3087.3	4.08e-11	1.35e-10	0.297412	0.195859	1.28e-11	9.05e-10	1.75e-09	4.74e-08	protein_coding	91404
DRAM1	ENSG00000136048	657.041	565.546	2030.58	4.38e-11	1.43e-10	0.248348	0.172115	4.25e-11	1.39e-09	3.13e-10	2.17e-08	protein_coding	55332
PNP	ENSG00000198805	1411.25	1268.19	4590.84	4.54e-11	1.47e-10	0.111781	0.0953178	3.26e-11	1.19e-09	1.62e-09	4.54e-08	protein_coding	4860
FOSL2	ENSG00000075426	6195.15	5696.24	14950.5	5.97e-11	1.85e-10	0.275858	0.185825	7.85e-11	1.93e-09	2.1e-10	2.17e-08	protein_coding	2355
PRKAB1	ENSG00000111725	1020.49	1061.96	2885.23	6.59e-11	2.01e-10	0.888965	0.403829	1.33e-11	9.05e-10	1.62e-09	4.54e-08	protein_coding	5564
SGPP1	ENSG00000126821	473.911	430.29	1350.77	7.96e-11	2.36e-10	0.37413	0.229872	5.54e-11	1.59e-09	5.04e-10	2.42e-08	protein_coding	81537
AP2A2	ENSG00000183020	1923.12	1905.62	6273.85	8.3e-11	2.45e-10	0.725785	0.35656	3.12e-11	1.16e-09	7.46e-10	2.91e-08	protein_coding	161
GFRA3	ENSG00000146013	443.929	-475.966	-179.188	1.25e-26	3.29e-23	1.29e-22	4.12e-19	2.19e-11	1.02e-09	0.000473018	0.00100515	protein_coding	2676
GCSAM	ENSG00000174500	-60.675	348.063	284.197	1.91e-26	3.29e-23	6.14e-24	5.9e-20	9.11e-10	9.71e-09	0.209139	0.145392	protein_coding	257144
ANKRD35	ENSG00000198483	494.162	-509.029	-162.735	4.88e-26	5.6e-23	1.27e-23	6.1e-20	9.92e-09	5.74e-08	0.000473018	0.00100515	protein_coding	148741
RNA5-8S5	ENSG00000276700	105.519	747.905	664.933	3.82e-25	3.29e-22	1.86e-22	4.47e-19	9.49e-10	1.01e-08	0.106359	0.0866591	rRNA	100008587
NTS	ENSG00000133636	-1023.77	4304.41	3485.63	5.61e-25	3.86e-22	3.18e-22	4.99e-19	7.41e-10	8.46e-09	0.152955	0.114792	protein_coding	4922
RPS16	ENSG00000105193	8423.72	45707.1	48854.7	2e-24	1.02e-21	1.77e-21	1.14e-18	3.65e-10	5.11e-09	0.715092	0.340646	protein_coding	6217
CYTL1	ENSG00000170891	462.372	-603.511	-118.354	2.07e-24	1.02e-21	1.2e-21	8.21e-19	1.35e-08	7.28e-08	1.37e-05	5.07e-05	protein_coding	54360
RNA5-8S5	ENSG00000278189	119.51	742.075	629.196	2.96e-24	1.27e-21	3.07e-22	4.99e-19	1.35e-08	7.28e-08	0.0591604	0.0547784	rRNA	100008587
RNA5-8S5	ENSG00000278233	121.587	738.7	628.059	3.98e-24	1.43e-21	4.15e-22	4.99e-19	1.4e-08	7.49e-08	0.0591604	0.0547784	rRNA	100008587
RNA5-8S5	ENSG00000275215	122.837	733.707	622.711	4.2e-24	1.43e-21	4.15e-22	4.99e-19	1.57e-08	8.14e-08	0.0543395	0.0513198	rRNA	100008587
LTF	ENSG00000012223	17655.4	-19279.8	-1616.02	4.56e-24	1.43e-21	1.32e-20	6.35e-18	1.21e-09	1.18e-08	3.81e-06	1.75e-05	protein_coding	4057
MT-ND1	ENSG00000198888	25037.4	92073.6	77717.6	8.58e-24	2.33e-21	2.38e-21	1.35e-18	3.73e-09	2.73e-08	0.0661355	0.0598141	protein_coding	4535
CLDN11	ENSG00000013297	-143.947	2417.05	2499.08	8.77e-24	2.33e-21	9.9e-21	5.01e-18	3.36e-10	4.81e-09	0.886844	0.387734	protein_coding	101928583
CLDN11	ENSG00000013297	-143.947	2417.05	2499.08	8.77e-24	2.33e-21	9.9e-21	5.01e-18	3.36e-10	4.81e-09	0.886844	0.387734	protein_coding	5010
APOB	ENSG00000084674	-310.212	1378.77	1252.8	1.01e-23	2.49e-21	2.71e-21	1.45e-18	2.41e-09	1.96e-08	0.523963	0.27899	protein_coding	338
RNA5-8S5	ENSG00000275757	129.44	730.936	613.966	1.57e-23	3.43e-21	7.53e-22	6.04e-19	5.39e-08	2.17e-07	0.0513112	0.0490144	rRNA	100008587
OLFML3	ENSG00000116774	2825.74	-2008.23	15.6746	1.59e-23	3.43e-21	5.41e-22	5.2e-19	1.28e-06	2.99e-06	5.07e-05	0.000152143	protein_coding	56944
RNA5-8S5	ENSG00000273730	131.592	730.504	607.099	2.64e-23	5.36e-21	8.32e-22	6.15e-19	1.11e-07	3.94e-07	0.0443533	0.0438134	rRNA	100008587
ASCL5	ENSG00000232237	306.056	-424.443	-268.768	4.83e-23	9.25e-21	8.22e-19	1.68e-16	1.22e-11	9.05e-10	0.00855294	0.0114	protein_coding	647219
ALG5	ENSG00000120697	495.264	965.334	1159.31	6.26e-23	1.13e-20	2.48e-19	5.81e-17	2.72e-10	4.13e-09	0.00824671	0.011086	protein_coding	29880
CLEC4D	ENSG00000166527	38.0526	-31.6575	2.66063	8.69e-23	1.5e-20	2.38e-21	1.35e-18	6.69e-06	1.2e-05	4.04e-06	1.83e-05	protein_coding	338339
EID2	ENSG00000176396	154.613	1121.91	1124.13	9.86e-23	1.62e-20	1.41e-20	6.45e-18	8.17e-09	4.95e-08	0.461585	0.255926	protein_coding	163126
	ENSG00000180458	-54.6454	238.457	238.065	1.26e-22	1.98e-20	4.43e-20	1.58e-17	2.41e-09	1.96e-08	0.669456	0.326649	antisense
BCL2L12	ENSG00000126453	238.764	502.011	592.961	1.34e-22	2e-20	6.27e-20	1.83e-17	1.97e-09	1.7e-08	0.160193	0.118923	protein_coding	83596
MT-ND2	ENSG00000198763	33178.9	120075	96041	1.46e-22	2.1e-20	3.23e-20	1.29e-17	1.57e-08	8.14e-08	0.00526618	0.007645	protein_coding	4536
PAK4	ENSG00000130669	559.91	3810.44	3793.33	1.99e-22	2.74e-20	4.72e-20	1.62e-17	4.37e-09	3.09e-08	0.642636	0.318392	protein_coding	10298
CLPTM1	ENSG00000104853	1621.07	3096.17	4153.18	2.68e-22	3.55e-20	5.18e-18	7.67e-16	1.16e-10	2.44e-09	0.00068229	0.00138443	protein_coding	1209
RARRES1	ENSG00000118849	-454.207	6571.43	3937.94	3.03e-22	3.87e-20	1.88e-20	7.86e-18	2.79e-07	8.51e-07	0.000518831	0.00109248	protein_coding	5918
MT-CO2	ENSG00000198712	35028.2	97002.1	103482	7.41e-22	9.13e-20	1.81e-18	3.56e-16	3.09e-10	4.53e-09	0.376305	0.222064	protein_coding	4513
MTTP	ENSG00000138823	-78.9772	348.036	290.944	1.19e-21	1.41e-19	3.66e-20	1.41e-17	1.15e-07	4.04e-07	0.227647	0.154661	protein_coding	4547
RIPPLY3	ENSG00000183145	194.099	-235.313	125.054	1.27e-21	1.46e-19	7.29e-22	6.04e-19	0.118259	0.0501021	6.18e-08	6.1e-07	protein_coding	53820
FMO3	ENSG00000007933	-56.0863	356.261	305.872	1.75e-21	1.95e-19	1.82e-19	4.85e-17	2.21e-08	1.06e-07	0.290075	0.183987	protein_coding	2328
GREM2	ENSG00000180875	275.951	-166.428	15.5428	1.82e-21	1.96e-19	1.34e-18	2.68e-16	4.92e-09	3.4e-08	0.000892608	0.00174066	protein_coding	64388
DUSP27	ENSG00000198842	284.854	-298.816	114.02	2.14e-21	2.23e-19	5.41e-22	5.2e-19	0.013487	0.00788669	1.53e-05	5.56e-05	protein_coding	92235
PAF1	ENSG00000006712	236.63	4285.99	3757.74	2.48e-21	2.52e-19	2.48e-19	5.81e-17	3.87e-08	1.67e-07	0.0528072	0.0501641	protein_coding	54623
FBL	ENSG00000105202	1653.17	10381.2	9694.15	2.71e-21	2.67e-19	9.14e-20	2.58e-17	1.2e-07	4.17e-07	0.209139	0.145392	protein_coding	2091
HNRNPM	ENSG00000099783	3771.74	5674.48	7089.62	3.16e-21	3.02e-19	4.7e-17	5.08e-15	2.2e-10	3.7e-09	0.00121328	0.00225765	protein_coding	4670
	ENSG00000273259	7594.3	-7030.71	2613.58	3.52e-21	3.28e-19	1.88e-20	7.86e-18	0.000416359	0.000398404	8.72e-07	5.17e-06	protein_coding	12
HSPB6	ENSG00000004776	105.587	1165.7	993.751	3.87e-21	3.51e-19	4.74e-19	1.08e-16	2.98e-08	1.36e-07	0.0575155	0.0536088	protein_coding	126393
SLC7A9	ENSG00000021488	-8.32187	100.496	76.0429	4.74e-21	4.19e-19	4.16e-20	1.54e-17	1.66e-06	3.73e-06	0.032804	0.0343883	protein_coding	11136
MS4A10	ENSG00000172689	-3.55375	53.6071	33.27	7.73e-21	6.66e-19	1.29e-19	3.54e-17	1.89e-06	4.16e-06	0.00248316	0.00407766	protein_coding	341116
SAFB	ENSG00000160633	1609.22	2286.32	3311.33	8.91e-21	7.49e-19	2.39e-14	1.06e-12	2.09e-11	9.87e-10	3.3e-08	3.76e-07	protein_coding	6294
SERPINA3	ENSG00000196136	2631.86	-2339.83	871.05	1.27e-20	1.05e-18	5.88e-20	1.83e-17	0.000531948	0.000490399	1.27e-06	6.99e-06	protein_coding
MT-CYB	ENSG00000198727	31095.1	91762.1	91594.9	1.36e-20	1.07e-18	3.41e-18	5.86e-16	8.5e-09	5.09e-08	0.363101	0.216479	protein_coding	4519
ATIC	ENSG00000138363	1459.63	2503.33	3268.15	1.37e-20	1.07e-18	2.09e-16	1.81e-14	2.72e-10	4.13e-09	0.00150421	0.00269769	protein_coding	471
SELENOF	ENSG00000183291	3900.84	7153.14	8231.68	1.48e-20	1.13e-18	1.38e-17	1.7e-15	1.89e-09	1.65e-08	0.237327	0.159229	protein_coding	9403
SFT2D1	ENSG00000198818	772.905	1198.8	1639.06	1.53e-20	1.14e-18	3.37e-15	1.95e-13	6.04e-11	1.67e-09	1.15e-05	4.4e-05	protein_coding	113402
C19orf47	ENSG00000160392	155.385	771.125	794.06	1.55e-20	1.14e-18	2.04e-18	3.93e-16	1.83e-08	9.14e-08	0.87708	0.385064	protein_coding	126526
RNA5-8S5	ENSG00000277739	153.614	688.048	565.585	1.58e-20	1.14e-18	5.52e-20	1.77e-17	6.1e-06	1.11e-05	0.0498508	0.0479655	rRNA	100008587
SYCE1	ENSG00000171772	-33.1851	192.974	175.649	1.73e-20	1.2e-18	3.21e-18	5.72e-16	1.35e-08	7.28e-08	0.356609	0.21357	protein_coding	93426
PITPNB	ENSG00000180957	1134.44	1928.66	2551.2	2.12e-20	1.43e-18	4.74e-16	3.62e-14	3.22e-10	4.69e-09	0.000232143	0.000549789	protein_coding	23760
	ENSG00000276846	-4.84585	85.8732	97.0394	2.6e-20	1.72e-18	6.98e-18	9.59e-16	7.86e-09	4.84e-08	0.965456	0.4071	antisense
CLDN18	ENSG00000066405	-570.809	3505.83	3830.96	2.74e-20	1.78e-18	3.62e-18	6.08e-16	1.97e-08	9.74e-08	0.847904	0.377188	protein_coding	51208
IGHA2	ENSG00000276173	1508.61	-1119.64	-455.984	3.27e-20	2.09e-18	5.52e-20	1.77e-17	1.12e-05	1.85e-05	0.145969	0.110815	IG_C_gene
THAP7	ENSG00000184436	899.663	-312.68	475.484	3.8e-20	2.38e-18	6.27e-20	1.83e-17	0.000448303	0.00042402	7.32e-05	0.000207073	protein_coding	80764
SRM	ENSG00000116649	737.484	1240.93	1582.24	3.92e-20	2.41e-18	3.89e-16	3.09e-14	4.7e-10	6e-09	0.00258669	0.00421479	protein_coding	6723
INSL3	ENSG00000248099	99.3936	-89.6863	21.2946	4.38e-20	2.65e-18	2.12e-19	5.23e-17	9.54e-05	0.00011279	4.81e-05	0.000145565	protein_coding	3640
CRISP3	ENSG00000096006	3246.74	-3368.11	926.953	5.16e-20	3.07e-18	5.69e-19	1.24e-16	7.67e-05	9.36e-05	3.81e-06	1.75e-05	protein_coding	10321
ACTG2	ENSG00000163017	-464.321	2972.67	3014.61	5.36e-20	3.13e-18	3.73e-18	6.08e-16	5.39e-08	2.17e-07	0.642636	0.318392	protein_coding	72
BMX	ENSG00000102010	56.8702	-41.4482	24.336	6.81e-20	3.91e-18	2.12e-19	5.23e-17	0.00320066	0.00230272	2.91e-07	2.09e-06	protein_coding	660
HMBS	ENSG00000256269	360.486	700.053	748.01	7.31e-20	4.07e-18	3.73e-18	6.08e-16	7.76e-08	2.91e-07	0.945741	0.40245	protein_coding	3145
LDOC1	ENSG00000182195	530.166	1391.83	1634.11	7.32e-20	4.07e-18	4.98e-17	5.33e-15	3.32e-09	2.51e-08	0.389802	0.227422	protein_coding	23641
ERVH48-1	ENSG00000233056	190.987	-71.034	-649.492	8.3e-20	4.46e-18	2.09e-12	5.3e-11	5.36e-12	9.05e-10	1.05e-08	1.58e-07	lincRNA
MT-ND3	ENSG00000198840	10064.3	27111.3	24462.6	8.34e-20	4.46e-18	6.78e-18	9.45e-16	6.71e-08	2.59e-07	0.132733	0.102934	protein_coding	4537
GPA33	ENSG00000143167	-12.293	104.328	64.1451	8.42e-20	4.46e-18	1.87e-19	4.87e-17	1.43e-05	2.27e-05	0.0543395	0.0513198	protein_coding	10223
MT-ATP8	ENSG00000228253	5237.41	14307.7	14518.7	1.58e-19	8.14e-18	2.71e-17	3.03e-15	1.9e-08	9.44e-08	0.965456	0.4071	protein_coding	4509
COL11A2	ENSG00000206290	-6.02105	65.7827	60.0188	1.63e-19	8.27e-18	1.3e-17	1.62e-15	6.01e-08	2.38e-07	0.369667	0.219306	protein_coding	1302
TMEM120A	ENSG00000189077	425.357	920.565	926.178	2.07e-19	1.04e-17	1.96e-17	2.22e-15	4.83e-08	2e-07	0.41059	0.235969	protein_coding	83862
CDC42EP5	ENSG00000273622	79.0058	313.388	266.442	2.32e-19	1.14e-17	3.41e-18	5.86e-16	1.12e-06	2.68e-06	0.0643312	0.0585767	protein_coding	148170
MT-ND6	ENSG00000198695	9177.17	19786.7	29649.4	2.65e-19	1.29e-17	1.33e-14	6.41e-13	1.94e-10	3.39e-09	0.000431	0.000931022	protein_coding	4541
SAA2	ENSG00000134339	679.893	-398.456	134.619	2.99e-19	1.43e-17	9.12e-18	1.22e-15	2.53e-06	5.3e-06	0.000309815	0.000701805	protein_coding	6289
AADACP1	ENSG00000240602	-23.5503	255.139	214.236	3.59e-19	1.7e-17	5.67e-18	8.14e-16	7.26e-07	1.87e-06	0.209139	0.145392	transcribed_unprocessed_pseudogene	201651
CAPZB	ENSG00000077549	3199.82	4682.93	6077.27	3.68e-19	1.71e-17	1.74e-14	8e-13	2.96e-10	4.4e-09	0.000156712	0.000393899	protein_coding	832
MT-ATP6	ENSG00000198899	31414.7	80733.2	84445.1	3.85e-19	1.77e-17	1.18e-16	1.07e-14	1.03e-08	5.91e-08	0.965456	0.4071	protein_coding	4508
PSME1	ENSG00000092010	3322.75	6526.99	6345.47	4.24e-19	1.92e-17	2.85e-18	5.17e-16	1.77e-06	3.93e-06	0.446665	0.249957	protein_coding	5720
CDK11B	ENSG00000248333	726.961	1216.81	1524.88	5.09e-19	2.25e-17	7.01e-15	3.62e-13	6.55e-10	7.67e-09	0.00138088	0.0025229	protein_coding	984
CCDC96	ENSG00000173013	146.95	-56.965	94.709	5.1e-19	2.25e-17	7.5e-19	1.6e-16	0.0192877	0.0106915	2.91e-07	2.09e-06	protein_coding	257236
AKT2	ENSG00000105221	1721.44	7463.35	8452.06	5.16e-19	2.25e-17	1.06e-17	1.37e-15	3.2e-07	9.53e-07	0.396659	0.230291	protein_coding	208
SSBP1	ENSG00000106028	1145.22	2123.82	2084.3	5.93e-19	2.55e-17	4.88e-18	7.45e-16	1.28e-06	2.99e-06	0.625009	0.312415	protein_coding	6742
PCIF1	ENSG00000100982	883.721	1516.05	1758.03	6.92e-19	2.94e-17	4.23e-16	3.34e-14	6.73e-09	4.32e-08	0.179417	0.12942	protein_coding	63935
ABCF1	ENSG00000231129	102.474	437.256	405.869	7.24e-19	3.04e-17	4.74e-18	7.35e-16	2.08e-06	4.5e-06	0.403589	0.233073	protein_coding	23
SNHG5	ENSG00000203875	1859.92	5182.6	5552.35	7.73e-19	3.2e-17	8.14e-17	8.07e-15	4.83e-08	2e-07	0.607594	0.306939	processed_transcript
ZNF831	ENSG00000124203	174.776	-168.39	-36.1849	7.8e-19	3.2e-17	6.63e-16	4.72e-14	6.73e-09	4.32e-08	0.00093302	0.0018107	protein_coding	128611
WBSCR22	ENSG00000071462	1329.61	2581.15	2668.99	8.8e-19	3.54e-17	4.7e-17	5.08e-15	1.11e-07	3.94e-07	0.790212	0.361862	protein_coding	114049
	ENSG00000270607	57.5682	-23.1251	12.2567	8.85e-19	3.54e-17	1.91e-17	2.18e-15	3.06e-06	6.23e-06	0.00126694	0.00234478	lincRNA
SCGB1D2	ENSG00000124935	2592.98	-1700.17	-156.282	9.59e-19	3.78e-17	9.95e-17	9.48e-15	2.11e-07	6.75e-07	0.00170832	0.00298911	protein_coding	10647
LAPTM4A	ENSG00000068697	6125.84	8833.43	14371.5	9.65e-19	3.78e-17	9.28e-12	1.94e-10	1.4e-11	9.05e-10	7.6e-08	7.08e-07	protein_coding	9741
SRP68	ENSG00000167881	1640.72	2500.76	3636.61	9.87e-19	3.82e-17	1.55e-13	5.45e-12	2.3e-10	3.78e-09	9.16e-06	3.63e-05	protein_coding	6730
KRTCAP3	ENSG00000157992	461.912	1128.6	1081.67	1e-18	3.84e-17	1.91e-17	2.18e-15	5e-07	1.38e-06	0.532053	0.282034	protein_coding	200634
KCNK13	ENSG00000152315	17.1568	165.441	138.628	1.16e-18	4.38e-17	1.55e-17	1.89e-15	1.16e-06	2.75e-06	0.175441	0.127335	protein_coding	56659
DBH-AS1	ENSG00000225756	244.561	-222.532	-38.1654	1.17e-18	4.4e-17	1.36e-15	8.63e-14	3.88e-09	2.81e-08	0.00111221	0.0020991	antisense	138948
KRT10	ENSG00000186395	407.243	652.435	773.203	1.21e-18	4.47e-17	1.4e-15	8.82e-14	4.37e-09	3.09e-08	0.0718002	0.0637793	protein_coding	3858
U2AF1	ENSG00000160201	1240.38	1880.29	2941.16	1.28e-18	4.69e-17	7.32e-12	1.57e-10	3.9e-11	1.32e-09	1.74e-08	2.28e-07	protein_coding	7307
PTX3	ENSG00000163661	81.746	1037.91	1024.84	1.36e-18	4.93e-17	6.65e-17	6.81e-15	1.53e-07	5.15e-07	0.484478	0.264145	protein_coding	5806
MT-ND4	ENSG00000198886	69962.2	155938	171411	1.49e-18	5.31e-17	1.12e-15	7.51e-14	5.99e-09	3.95e-08	0.183459	0.131649	protein_coding	4538
CEND1	ENSG00000184524	-13.1845	96.717	119.145	1.5e-18	5.31e-17	7.25e-17	7.27e-15	1.38e-07	4.72e-07	0.598968	0.304274	protein_coding	51286
RNA5-8S5	ENSG00000274917	163.185	679.428	558.042	1.64e-18	5.76e-17	2.45e-18	4.62e-16	3.23e-05	4.52e-05	0.0865716	0.0737877	rRNA	100008587
LILRB2	ENSG00000274513	39.084	-34.5269	6.50773	1.74e-18	5.98e-17	9.12e-18	1.22e-15	5.83e-05	7.42e-05	0.000324917	0.000730657	protein_coding	10288
BAX	ENSG00000087088	699.281	1068.4	1712.85	1.76e-18	6e-17	2.73e-12	6.67e-11	4.65e-11	1.4e-09	1.05e-06	6.04e-06	protein_coding	581
BRINP2	ENSG00000198797	380.829	-468.406	-106.311	1.99e-18	6.74e-17	1.12e-17	1.44e-15	2.96e-05	4.21e-05	0.00126694	0.00234478	protein_coding	57795
RBX1	ENSG00000100387	820.438	1442.05	1595.18	2.03e-18	6.78e-17	2.48e-16	2.11e-14	4.65e-08	1.94e-07	0.598968	0.304274	protein_coding	9978
SUPT5H	ENSG00000196235	2186.18	7118.44	7257.68	2.2e-18	7.3e-17	6.1e-17	6.31e-15	3.67e-07	1.07e-06	0.424808	0.2414	protein_coding	6829
TIMM50	ENSG00000105197	824.237	3881.45	3804.18	2.26e-18	7.42e-17	5.44e-17	5.75e-15	6.56e-07	1.72e-06	0.109067	0.0884838	protein_coding	92609
APCDD1L	ENSG00000198768	171.949	-120.88	52.3368	2.29e-18	7.44e-17	3.96e-18	6.35e-16	0.00264183	0.00195235	7.27e-06	3e-05	protein_coding	164284
	ENSG00000272841	13.9265	187.666	164.168	2.31e-18	7.45e-17	5.93e-17	6.2e-15	4.67e-07	1.3e-06	0.262788	0.17118	antisense
MB	ENSG00000198125	113.191	-34.4548	-10.9795	2.35e-18	7.49e-17	1.16e-15	7.61e-14	1.2e-08	6.69e-08	0.00795032	0.0107578	protein_coding	4151
ECH1	ENSG00000104823	1851.02	3288.05	5162.44	2.51e-18	7.88e-17	1.63e-13	5.66e-12	4.51e-10	5.88e-09	4.56e-05	0.000138851	protein_coding	1891
POMP	ENSG00000132963	1432.87	2301.57	2577.96	2.51e-18	7.88e-17	4.87e-16	3.66e-14	2.87e-08	1.32e-07	0.424808	0.2414	protein_coding	51371
	ENSG00000230202	24.5133	378.149	386.842	2.81e-18	8.71e-17	5.01e-16	3.74e-14	2.87e-08	1.32e-07	0.76177	0.353981	processed_pseudogene
PARK7	ENSG00000116288	3028.26	4505.13	5148.31	3.2e-18	9.85e-17	1.01e-15	6.86e-14	1.9e-08	9.44e-08	0.218252	0.15005	protein_coding	11315
ERCC2	ENSG00000104884	415.749	1021.26	1031.11	3.41e-18	1.04e-16	1.08e-16	1.02e-14	2.69e-07	8.28e-07	0.799757	0.364306	protein_coding	2068
TTYH1	ENSG00000276537	-84.9061	418.255	392.108	3.63e-18	1.1e-16	4.35e-16	3.41e-14	5.39e-08	2.17e-07	0.424808	0.2414	protein_coding	57348
DLD	ENSG00000091140	1795.3	3334.93	3717.8	3.67e-18	1.1e-16	1.52e-15	9.45e-14	1.25e-08	6.89e-08	0.350191	0.21083	protein_coding	1738
	ENSG00000225840	14485.5	34636.3	30304.1	3.92e-18	1.17e-16	5.5e-18	8.02e-16	3.61e-05	4.96e-05	0.111828	0.0901952	processed_pseudogene
HRCT1	ENSG00000196196	11.3637	96.074	83.766	4.12e-18	1.21e-16	8.38e-17	8.22e-15	8.3e-07	2.09e-06	0.149431	0.112823	protein_coding	646962
UXT	ENSG00000126756	839.647	1949.61	1631.64	4.27e-18	1.25e-16	1.23e-17	1.55e-15	2.22e-05	3.28e-05	0.0370712	0.0378342	protein_coding	8409
CASQ1	ENSG00000143318	89.2461	-69.4217	0.137202	4.45e-18	1.29e-16	9.95e-17	9.48e-15	3.7e-06	7.32e-06	0.00111221	0.0020991	protein_coding	844
COL19A1	ENSG00000082293	-8.75893	92.8785	87.8763	4.78e-18	1.37e-16	1.15e-16	1.05e-14	4.36e-07	1.23e-06	0.771217	0.356672	protein_coding	1310
CHMP4A	ENSG00000254505	679.949	1167.19	1394	5.03e-18	1.43e-16	6.12e-15	3.2e-13	5.54e-09	3.74e-08	0.0661355	0.0598141	protein_coding	29082
CRYM	ENSG00000103316	186.008	-83.692	208.933	5.17e-18	1.46e-16	7.73e-19	1.62e-16	0.733949	0.222598	2.21e-06	1.11e-05	protein_coding	1428
UTP4	ENSG00000141076	520.804	966.607	1084.95	5.53e-18	1.55e-16	9.26e-16	6.5e-14	4.01e-08	1.72e-07	0.389802	0.227422	protein_coding	84916
MED29	ENSG00000063322	861.782	4480.76	5247.87	5.78e-18	1.61e-16	4.48e-16	3.47e-14	9.64e-08	3.49e-07	0.975322	0.40949	protein_coding	55588
CENPW	ENSG00000203760	149.501	950.272	1023.71	6.03e-18	1.66e-16	3.58e-16	2.94e-14	1.43e-07	4.86e-07	0.669456	0.326649	protein_coding	387103
	ENSG00000233110	3.65765	13.7378	5.71977	6.68e-18	1.83e-16	4.2e-18	6.63e-16	0.0241363	0.0129694	5.12e-06	2.24e-05	antisense
PI3	ENSG00000124102	1581.38	-1393.48	804.271	7.73e-18	2.1e-16	1.91e-17	2.18e-15	0.00113402	0.000940999	1.53e-05	5.56e-05	protein_coding	5266
ADRA2A	ENSG00000150594	986.945	-436.989	-58.3555	8.12e-18	2.18e-16	5.18e-18	7.67e-16	9.8e-05	0.000115481	0.156543	0.116841	protein_coding	150
CRKL	ENSG00000099942	4080.52	-1287.64	3444.52	8.17e-18	2.18e-16	2.68e-18	4.96e-16	0.574045	0.183831	5.23e-07	3.33e-06	protein_coding	1399
HNRNPUL2-BSCL2	ENSG00000234857	1422.58	2360.73	2509.87	8.5e-18	2.25e-16	6.27e-16	4.57e-14	1.15e-07	4.04e-07	0.454091	0.252708	protein_coding
COPS6	ENSG00000168090	1480.76	2564.61	2632.59	9.22e-18	2.43e-16	1.87e-16	1.63e-14	5.73e-07	1.54e-06	0.955595	0.40484	protein_coding	10980
ABCF1	ENSG00000236342	108.267	426.346	387.251	1.02e-17	2.66e-16	4.31e-17	4.77e-15	6.29e-06	1.14e-05	0.319207	0.197358	protein_coding	23
SOX8	ENSG00000005513	-4.06612	68.2716	72.0331	1.13e-17	2.92e-16	1.01e-15	6.86e-14	8.97e-08	3.29e-07	0.916235	0.395342	protein_coding	30812
DBH	ENSG00000123454	280.268	-284.928	-70.1288	1.14e-17	2.93e-16	1.56e-14	7.37e-13	3.06e-09	2.36e-08	0.0022874	0.00380065	protein_coding	1621
MCOLN1	ENSG00000090674	287.53	479.55	584.695	1.16e-17	2.95e-16	6.14e-14	2.39e-12	2.32e-09	1.91e-08	0.00636395	0.00894704	protein_coding	57192
CYR61	ENSG00000142871	2527.66	9825.71	2824.48	1.29e-17	3.26e-16	1.06e-17	1.37e-15	0.551987	0.178151	6.62e-08	6.4e-07	protein_coding	3491
ATF5	ENSG00000169136	1011.51	2715.53	3131.14	1.43e-17	3.59e-16	1.03e-15	6.96e-14	1.24e-07	4.29e-07	0.724349	0.343255	protein_coding	100616483
ATF5	ENSG00000169136	1011.51	2715.53	3131.14	1.43e-17	3.59e-16	1.03e-15	6.96e-14	1.24e-07	4.29e-07	0.724349	0.343255	protein_coding	22809
IGHA1	ENSG00000211895	7699.29	-3180.57	-4859.89	1.49e-17	3.72e-16	7.41e-16	5.24e-14	2.34e-07	7.37e-07	0.152955	0.114792	IG_C_gene
C2	ENSG00000204364	-8.4978	758.759	725.813	1.55e-17	3.84e-16	1.52e-15	9.45e-14	8.97e-08	3.29e-07	0.389802	0.227422	protein_coding	717
NME1-NME2	ENSG00000011052	402.652	1014.41	870.145	1.7e-17	4.18e-16	1.6e-17	1.92e-15	7.27e-05	8.94e-05	0.132733	0.102934	protein_coding	654364
	ENSG00000234478	24.518	-14.7273	-15.0316	1.74e-17	4.26e-16	1.11e-13	4.05e-12	1.94e-10	3.39e-09	0.227647	0.154661	antisense
FABP6	ENSG00000170231	-36.3938	433.28	369.506	1.79e-17	4.35e-16	4.74e-16	3.62e-14	6.13e-07	1.63e-06	0.268099	0.173626	protein_coding	2172
RPS21	ENSG00000171858	8142.51	21730.3	21323.2	1.94e-17	4.68e-16	6.09e-16	4.51e-14	4.83e-07	1.34e-06	0.284471	0.181251	protein_coding	6227
CYP2S1	ENSG00000167600	183.168	607.833	662.108	2.14e-17	5.11e-16	3.78e-16	3.03e-14	7.76e-07	1.98e-06	0.847904	0.377188	protein_coding	29785
NDUFB6	ENSG00000165264	751.183	1301.85	1305.62	2.15e-17	5.11e-16	1.15e-16	1.05e-14	4.33e-06	8.34e-06	0.540206	0.285132	protein_coding	4712
LAMTOR5	ENSG00000134248	1567.46	2183.13	3246.28	2.32e-17	5.48e-16	7.48e-11	1.23e-09	3.9e-11	1.32e-09	1.12e-06	6.37e-06	protein_coding	10542
KLK1	ENSG00000167748	1133.49	-891.766	13.0484	2.35e-17	5.52e-16	9.52e-16	6.63e-14	1.32e-06	3.07e-06	0.00238344	0.00393974	protein_coding	3816
BEX5	ENSG00000184515	232.745	-56.3646	32.9017	2.37e-17	5.52e-16	1.22e-15	7.94e-14	5.73e-07	1.54e-06	0.0102418	0.0132194	protein_coding	340542
MT-ND5	ENSG00000198786	31912.9	67850.3	84552.3	2.66e-17	6.16e-16	2.95e-14	1.29e-12	7.86e-09	4.84e-08	0.0865716	0.0737877	protein_coding	4540
GSK3A	ENSG00000105723	1134.12	1580.56	2465.62	2.79e-17	6.4e-16	2.32e-11	4.41e-10	2.11e-10	3.58e-09	4.91e-07	3.17e-06	protein_coding	2931
RRAS	ENSG00000126458	531.465	944.752	1147.16	2.97e-17	6.78e-16	2.33e-14	1.04e-12	1.03e-08	5.91e-08	0.156543	0.116841	protein_coding	6237
MAP3K10	ENSG00000130758	214.639	753.718	886.669	3.12e-17	7.08e-16	1.49e-16	1.31e-14	3.82e-06	7.49e-06	0.556698	0.290739	protein_coding	4294
BNIP3P1	ENSG00000197358	34.4646	70.2539	81.771	3.51e-17	7.91e-16	9.67e-15	4.82e-13	3.73e-08	1.62e-07	0.156543	0.116841	transcribed_processed_pseudogene
DLGAP3	ENSG00000116544	44.8973	336.739	390.826	3.57e-17	7.99e-16	5.07e-15	2.71e-13	6.01e-08	2.38e-07	0.896626	0.390371	protein_coding	58512
S100A10	ENSG00000197747	2507.17	5699.51	7602.67	3.91e-17	8.68e-16	4.85e-14	1.98e-12	8.5e-09	5.09e-08	0.0528072	0.0501641	protein_coding	6281
MAP2K5	ENSG00000137764	260.833	406.337	475.502	4.37e-17	9.65e-16	1e-13	3.76e-12	5.54e-09	3.74e-08	0.0210154	0.0239902	protein_coding	5607
DDX1	ENSG00000079785	2147.8	3468.88	3574.59	4.51e-17	9.84e-16	6.63e-16	4.72e-14	1.08e-06	2.6e-06	0.581886	0.299139	protein_coding	1653
SNX2	ENSG00000205302	1765.7	2449.39	4272.63	4.51e-17	9.84e-16	2.1e-09	2.3e-08	1.91e-11	9.6e-10	3.72e-09	7.63e-08	protein_coding	6643
NPTX1	ENSG00000171246	687.827	-72.1773	-1541	4.68e-17	1.02e-15	8.18e-11	1.33e-09	7.85e-11	1.93e-09	1.53e-06	8.18e-06	protein_coding	4884
TNFRSF6B	ENSG00000243509	559.396	-377.653	-140.168	5.04e-17	1.09e-15	2.77e-16	2.32e-14	8.54e-06	1.47e-05	0.109067	0.0884838	protein_coding	8771
ESR2	ENSG00000140009	53.6515	135.718	364.38	5.13e-17	1.1e-15	6.8e-09	6.4e-08	5.12e-12	9.05e-10	9.05e-09	1.42e-07	protein_coding	2100
ZFP36	ENSG00000128016	1845.08	7453.08	3905.75	5.61e-17	1.19e-15	1.8e-17	2.13e-15	0.0120779	0.00717041	0.000200555	0.000485527	protein_coding	7538
STXBP2	ENSG00000076944	1173.53	1938.56	2112.32	5.78e-17	1.22e-15	8.46e-15	4.26e-13	7.21e-08	2.74e-07	0.389802	0.227422	protein_coding	6813
TRAF3IP2	ENSG00000056972	758.866	1597.58	223.835	6.06e-17	1.27e-15	1.18e-11	2.37e-10	2.11e-07	6.75e-07	2.46e-10	2.17e-08	protein_coding	10758
DCTN3	ENSG00000137100	694.125	1277.82	1201.61	6.28e-17	1.31e-15	3.19e-16	2.65e-14	8.29e-06	1.44e-05	0.175441	0.127335	protein_coding	11258
HBB	ENSG00000244734	479.151	7102.12	-3090.26	6.53e-17	1.36e-15	3.68e-16	3e-14	0.00928533	0.0057265	1.22e-07	1.05e-06	protein_coding	3043
PSMC5	ENSG00000087191	1547.46	2416.99	3073.05	6.97e-17	1.44e-15	2.52e-13	8.22e-12	4.37e-09	3.09e-08	0.0109965	0.0140255	protein_coding	5705
EMD	ENSG00000102119	951.946	1631.81	1983.77	7.13e-17	1.46e-15	5.83e-14	2.3e-12	1.45e-08	7.73e-08	0.0679814	0.0611255	protein_coding	2010
OMG	ENSG00000126861	184.115	-59.2936	-58.9314	7.17e-17	1.46e-15	1.76e-13	6.02e-12	1.82e-09	1.61e-08	0.556698	0.290739	protein_coding	4974
OMG	ENSG00000126861	184.115	-59.2936	-58.9314	7.17e-17	1.46e-15	1.76e-13	6.02e-12	1.82e-09	1.61e-08	0.556698	0.290739	protein_coding	101927057
SLC25A5	ENSG00000005022	5125.45	9014.31	8982.34	8.21e-17	1.66e-15	8.87e-17	8.62e-15	4.05e-05	5.45e-05	0.556698	0.290739	protein_coding	292
UQCRFS1	ENSG00000169021	2128.9	5588.92	7146.02	8.63e-17	1.74e-15	3.86e-15	2.14e-13	3.09e-07	9.27e-07	0.955595	0.40484	protein_coding	7386
DKK1	ENSG00000107984	1251.85	-412.571	-477.263	8.67e-17	1.74e-15	4.62e-13	1.41e-11	3.81e-10	5.25e-09	0.598968	0.304274	protein_coding	22943
DNTTIP1	ENSG00000101457	554.382	898.158	984.855	9.27e-17	1.85e-15	3.47e-15	1.98e-13	3.94e-07	1.13e-06	0.76177	0.353981	protein_coding	116092
TMEM74B	ENSG00000125895	117.875	-46.8763	73.8428	1.15e-16	2.27e-15	6.58e-18	9.3e-16	0.26651	0.0987392	0.000141843	0.000362125	protein_coding	55321
PSMA3	ENSG00000100567	1340.61	2045.76	2199.91	1.43e-16	2.81e-15	5.65e-15	2.98e-13	4.07e-07	1.16e-06	0.492244	0.267028	protein_coding	5684
CORO7-PAM16	ENSG00000278760	132.867	265.229	270.071	1.51e-16	2.96e-15	2.24e-15	1.37e-13	1.36e-06	3.16e-06	0.838223	0.374988	protein_coding	100529144
CLIP3	ENSG00000105270	368.275	1029.55	1392.2	1.53e-16	2.99e-15	5.25e-14	2.1e-12	3.46e-08	1.53e-07	0.222914	0.152373	protein_coding	25999
TNS4	ENSG00000131746	34.9691	656.649	684.201	1.78e-16	3.44e-15	1.83e-14	8.4e-13	1.24e-07	4.29e-07	0.669456	0.326649	protein_coding	84951
MRPL22	ENSG00000082515	409.961	642.133	708.033	1.84e-16	3.54e-15	1.02e-14	5.03e-13	2.88e-07	8.75e-07	0.424808	0.2414	protein_coding	29093
COL11A2	ENSG00000227801	-8.60736	132.046	112.275	1.85e-16	3.54e-15	5.07e-15	2.71e-13	8.3e-07	2.09e-06	0.27894	0.17871	protein_coding	1302
TMEM130	ENSG00000166448	68.6304	417.82	349.694	2.04e-16	3.89e-15	2.94e-15	1.73e-13	2.61e-06	5.45e-06	0.12343	0.0972914	protein_coding	222865
SAA1	ENSG00000173432	1519.67	-461.942	853.75	2.1e-16	3.99e-15	2.15e-16	1.85e-14	0.00264183	0.00195235	0.000149103	0.000377539	protein_coding	6288
DES	ENSG00000175084	-1136.16	5794.75	6867.37	2.19e-16	4.11e-15	3.97e-15	2.18e-13	1.16e-06	2.75e-06	0.995064	0.41464	protein_coding	1674
SYNM	ENSG00000182253	-205.608	1701.69	2496.62	2.2e-16	4.11e-15	3.45e-14	1.5e-12	1.15e-07	4.04e-07	0.0888693	0.0753855	protein_coding	23336
GEMIN7	ENSG00000142252	252.848	438.223	539.484	2.25e-16	4.2e-15	4.61e-14	1.93e-12	7.21e-08	2.74e-07	0.187569	0.134068	protein_coding	79760
RPS29	ENSG00000213741	10326.4	19653.1	18234.1	2.53e-16	4.68e-15	6.44e-16	4.66e-14	3.05e-05	4.31e-05	0.126473	0.0991497	protein_coding	6235
LTB	ENSG00000223448	14.6956	89.3487	6.95584	2.7e-16	4.98e-15	1.33e-16	1.18e-14	0.0546546	0.0261087	2.82e-06	1.36e-05	protein_coding	4050
GLIS2	ENSG00000274636	379.283	809.818	1027.6	2.85e-16	5.23e-15	1.86e-13	6.25e-12	1.97e-08	9.74e-08	0.152955	0.114792	protein_coding	84662
EID2B	ENSG00000176401	24.5388	233.604	204.268	2.87e-16	5.24e-15	1.29e-15	8.28e-14	1.16e-05	1.9e-05	0.222914	0.152373	protein_coding	126272
KLF6	ENSG00000067082	2917.91	6380.32	10271.1	3e-16	5.43e-15	1.6e-12	4.17e-11	6.23e-09	4.06e-08	0.00210587	0.00354802	protein_coding	1316
TBC1D17	ENSG00000104946	649.657	949.645	1337.7	3.01e-16	5.43e-15	6.38e-11	1.07e-09	4.14e-10	5.59e-09	3.3e-05	0.000106231	protein_coding	79735
TBC1D17	ENSG00000104946	649.657	949.645	1337.7	3.01e-16	5.43e-15	6.38e-11	1.07e-09	4.14e-10	5.59e-09	3.3e-05	0.000106231	protein_coding	100616314
ZNF569	ENSG00000196437	147.425	477.998	653.616	3.14e-16	5.63e-15	1.17e-13	4.22e-12	3.59e-08	1.58e-07	0.21366	0.14766	protein_coding	148266
ZFP36L2	ENSG00000152518	4960.84	11109.8	11207.1	3.18e-16	5.68e-15	1.48e-14	7.06e-13	3.67e-07	1.07e-06	0.935896	0.400117	protein_coding	678
MTATP6P1	ENSG00000248527	9820.81	4445.49	17762.4	3.22e-16	5.72e-15	1.26e-11	2.5e-10	7.02e-07	1.83e-06	1.62e-09	4.54e-08	unprocessed_pseudogene
SAFB2	ENSG00000130254	934.171	1280.35	1911.94	3.35e-16	5.91e-15	7.76e-10	9.38e-09	1.57e-10	2.96e-09	3.11e-07	2.2e-06	protein_coding	9667
ST3GAL6-AS1	ENSG00000239445	7.31334	32.5699	38.6846	3.36e-16	5.91e-15	1.65e-14	7.66e-13	3.67e-07	1.07e-06	0.47678	0.261455	antisense	100874207
COL11A2	ENSG00000235708	-9.31674	77.1851	89.6814	3.38e-16	5.91e-15	1.61e-14	7.5e-13	3.67e-07	1.07e-06	0.696704	0.33516	protein_coding	1302
TMEM213	ENSG00000214128	251.587	-175.314	-72.6916	3.4e-16	5.91e-15	1.51e-13	5.33e-12	1.63e-08	8.4e-08	0.187569	0.134068	protein_coding	155006
CCDC9	ENSG00000105321	342.547	478.332	715.927	3.74e-16	6.47e-15	6.82e-10	8.42e-09	1.02e-10	2.26e-09	2.66e-06	1.29e-05	protein_coding	26093
MGAM	ENSG00000257335	5.05326	197.212	120.622	3.98e-16	6.85e-15	3.78e-16	3.03e-14	0.000185013	0.00019871	0.0543395	0.0513198	protein_coding	8972
GMDS	ENSG00000112699	427.707	1057.76	999.149	4.15e-16	7.11e-15	6.27e-16	4.57e-14	5.21e-05	6.74e-05	0.232451	0.15689	protein_coding	2762
PCGF2	ENSG00000277258	503.677	887.748	1002.34	4.22e-16	7.21e-15	5.68e-14	2.25e-12	1.11e-07	3.94e-07	0.454091	0.252708	protein_coding	7703
AGER	ENSG00000204305	2.97531	19.0921	22.7557	4.26e-16	7.23e-15	3.84e-14	1.65e-12	1.65e-07	5.48e-07	0.916235	0.395342	protein_coding	177
RINT1	ENSG00000135249	495.137	859.679	1088.96	4.3e-16	7.23e-15	1.19e-12	3.25e-11	7.86e-09	4.84e-08	0.0145327	0.0176327	protein_coding	60561
FUS	ENSG00000089280	5647.58	8063.19	10697.1	4.3e-16	7.23e-15	2.43e-11	4.6e-10	7.41e-10	8.46e-09	0.000568754	0.00118254	protein_coding	2521
RPL27	ENSG00000131469	10451.9	18712.1	21103.6	4.41e-16	7.38e-15	4.15e-14	1.77e-12	1.65e-07	5.48e-07	0.642636	0.318392	protein_coding	6155
LMX1B	ENSG00000136944	26.1826	145.512	123.296	4.64e-16	7.72e-15	1.61e-14	7.5e-13	1.46e-06	3.34e-06	0.0135656	0.0166181	protein_coding	4010
GMFG	ENSG00000130755	164.332	366.672	335.915	4.71e-16	7.8e-15	9.79e-16	6.77e-14	3.61e-05	4.96e-05	0.21366	0.14766	protein_coding	9535
FN3K	ENSG00000167363	235.558	391.971	668.293	4.8e-16	7.91e-15	8.37e-11	1.34e-09	1.16e-09	1.15e-08	3.18e-06	1.51e-05	protein_coding	64122
ZNF793-AS1	ENSG00000266916	23.5768	110.431	125.26	5.14e-16	8.43e-15	4.43e-15	2.41e-13	3.47e-06	6.95e-06	0.935896	0.400117	antisense
MTND2P28	ENSG00000225630	4985.2	234.701	8132.16	5.85e-16	9.54e-15	1.33e-13	4.71e-12	0.000245653	0.000252809	1.74e-08	2.28e-07	unprocessed_pseudogene
SLCO2A1	ENSG00000174640	1079.39	-488.548	113.983	5.87e-16	9.54e-15	5.25e-14	2.1e-12	4.51e-07	1.27e-06	0.00342915	0.00533063	protein_coding	6578
CFB	ENSG00000204359	47.9477	740.93	732.851	6.27e-16	1.01e-14	3.28e-14	1.43e-12	3.67e-07	1.07e-06	0.532053	0.282034	protein_coding	629
S100A2	ENSG00000196754	270.156	1883.6	1946.15	6.71e-16	1.08e-14	7.4e-15	3.8e-13	2.96e-06	6.08e-06	0.590398	0.30179	protein_coding	6273
APOC1	ENSG00000130208	430.461	2835.82	1700.31	6.82e-16	1.09e-14	4.87e-16	3.66e-14	0.00105818	0.000887032	0.00401603	0.00606683	protein_coding	341
GCSHP5	ENSG00000224837	102.952	50.1402	227.623	7.12e-16	1.14e-14	4.25e-09	4.2e-08	3.45e-09	2.58e-08	2.67e-10	2.17e-08	processed_pseudogene
ATP1B2	ENSG00000129244	50.3466	254.398	275.219	7.42e-16	1.18e-14	8.93e-15	4.47e-13	2.37e-06	5.02e-06	0.906424	0.392828	protein_coding	482
PFDN2	ENSG00000143256	694.68	1232.11	1107.53	7.47e-16	1.18e-14	2.55e-16	2.15e-14	0.000437409	0.000415546	0.191746	0.136328	protein_coding	5202
EGR1	ENSG00000120738	3006.58	12154.3	5595.51	7.87e-16	1.24e-14	1.12e-16	1.04e-14	0.0491412	0.0238277	0.000374462	0.000826228	protein_coding	1958
TM6SF2	ENSG00000213996	2.99732	44.9474	37.3705	8.33e-16	1.31e-14	1.25e-16	1.13e-14	0.000645255	0.000578511	0.581886	0.299139	protein_coding	53345
ALPPL2	ENSG00000163286	921.297	-389.581	-98.5519	8.61e-16	1.34e-14	1.2e-13	4.31e-12	1.28e-07	4.43e-07	0.0484255	0.0469206	protein_coding	251
SYVN1	ENSG00000162298	1031.16	1415.95	2152.54	8.99e-16	1.4e-14	7.53e-09	6.98e-08	5.07e-11	1.48e-09	3.55e-07	2.46e-06	protein_coding	102465449
SYVN1	ENSG00000162298	1031.16	1415.95	2152.54	8.99e-16	1.4e-14	7.53e-09	6.98e-08	5.07e-11	1.48e-09	3.55e-07	2.46e-06	protein_coding	84447
ASL	ENSG00000126522	552.015	1116.78	1135.48	9.14e-16	1.41e-14	1.11e-14	5.4e-13	3.06e-06	6.23e-06	0.389802	0.227422	protein_coding	435
ILVBL	ENSG00000105135	1315.16	2786.7	2799.9	9.33e-16	1.44e-14	1.26e-14	6.14e-13	2.53e-06	5.3e-06	0.461585	0.255926	protein_coding	10994
SSU72	ENSG00000160075	2031.96	3307.95	3915.62	9.55e-16	1.46e-14	5.93e-13	1.76e-11	3.73e-08	1.62e-07	0.0443533	0.0438134	protein_coding	29101
MRPL34	ENSG00000130312	607.629	977.915	1136.23	1e-15	1.53e-14	6.99e-14	2.68e-12	2.69e-07	8.28e-07	0.818935	0.369338	protein_coding	64981
	ENSG00000278996	181.179	418.646	360.19	1.07e-15	1.62e-14	2.71e-15	1.62e-13	3.72e-05	5.09e-05	0.142569	0.108723	lincRNA
POP4	ENSG00000105171	605.371	1903.24	1962.65	1.1e-15	1.66e-14	3.19e-15	1.86e-13	4.28e-05	5.73e-05	0.0608443	0.0560462	protein_coding	10775
CXCL2	ENSG00000081041	145.123	778.159	279.902	1.12e-15	1.68e-14	1.22e-15	7.94e-14	0.0120779	0.00717041	1.29e-05	4.84e-05	protein_coding	2920
HMGB1P5	ENSG00000132967	200.721	346.623	445.418	1.13e-15	1.69e-14	4.02e-12	9.43e-11	6.23e-09	4.06e-08	0.021714	0.024639	transcribed_processed_pseudogene
PARP2	ENSG00000129484	429.07	796.935	904.197	1.15e-15	1.71e-14	8.38e-14	3.17e-12	2.69e-07	8.28e-07	0.633797	0.31526	protein_coding	10038
CLASRP	ENSG00000104859	519.65	774.628	936.245	1.16e-15	1.72e-14	9.96e-12	2.04e-10	3.32e-09	2.51e-08	0.00685789	0.00953011	protein_coding	11129
LRRC75A-AS1	ENSG00000175061	9847.71	25107.5	27461.8	1.22e-15	1.81e-14	1.74e-14	8e-13	2.22e-06	4.75e-06	0.771217	0.356672	processed_transcript	125144
PODNL1	ENSG00000132000	84.9042	367.47	158.47	1.26e-15	1.85e-14	1.29e-15	8.28e-14	0.0267095	0.0141435	4.55e-06	2.02e-05	protein_coding	79883
YEATS4	ENSG00000127337	438.422	1254.09	1524.12	1.29e-15	1.89e-14	6.24e-13	1.83e-11	3.09e-08	1.4e-07	0.290075	0.183987	protein_coding	8089
CHGB	ENSG00000089199	2685.91	-4438.52	-1817.64	1.32e-15	1.93e-14	4.15e-14	1.77e-12	1.61e-06	3.64e-06	0.0271943	0.0296239	protein_coding	1114
SEC61G	ENSG00000132432	1113.3	1906.51	1842.22	1.39e-15	2.03e-14	2.86e-15	1.69e-13	3.51e-05	4.85e-05	0.376305	0.222064	protein_coding	23480
TGFB1	ENSG00000105329	627.195	1233.67	862.969	1.5e-15	2.18e-14	7.25e-17	7.27e-15	0.0514441	0.024765	0.00526618	0.007645	protein_coding	7040
PLOD3	ENSG00000106397	956.988	2957.14	2273	1.55e-15	2.23e-14	2.5e-15	1.51e-13	0.000109117	0.000126276	0.0559087	0.0524595	protein_coding	8985
THAP7-AS1	ENSG00000230513	91.541	-25.1433	46.1622	1.64e-15	2.36e-14	1.03e-15	6.96e-14	0.00437553	0.00301232	0.000495431	0.0010482	antisense	439931
ACY3	ENSG00000132744	93.1613	-42.5028	20.1453	1.73e-15	2.47e-14	1.52e-14	7.22e-13	4.79e-05	6.28e-05	0.00059536	0.00122931	protein_coding	91703
REEP4	ENSG00000168476	407.072	575.33	869.848	1.81e-15	2.58e-14	1.78e-09	1.98e-08	2.84e-10	4.24e-09	2.66e-06	1.29e-05	protein_coding	80346
TSPAN11	ENSG00000110900	504.795	-113.575	-289.691	1.86e-15	2.63e-14	1.92e-10	2.76e-09	1.02e-11	9.05e-10	0.916235	0.395342	protein_coding	441631
ZFAS1	ENSG00000177410	1820.17	4081.94	4421.1	1.87e-15	2.64e-14	4.85e-14	1.98e-12	1.08e-06	2.6e-06	0.76177	0.353981	antisense	441951
SLC46A2	ENSG00000119457	87.0243	-39.4547	-7.85675	1.91e-15	2.69e-14	6.08e-13	1.79e-11	4.48e-08	1.88e-07	0.0135656	0.0166181	protein_coding	57864
KIAA0513	ENSG00000135709	618.231	188.224	2745	2.06e-15	2.88e-14	8.17e-08	5.72e-07	3.5e-10	4.98e-09	2.89e-10	2.17e-08	protein_coding	9764
MAGOH	ENSG00000162385	688.975	1149.69	1161.09	2.1e-15	2.92e-14	4.31e-15	2.35e-13	3.41e-05	4.74e-05	0.484478	0.264145	protein_coding	4116
DDAH2	ENSG00000213722	55.3062	851.026	1256.49	2.12e-15	2.95e-14	1.13e-12	3.1e-11	3.73e-08	1.62e-07	0.142569	0.108723	protein_coding	23564
SYNGR2	ENSG00000108639	3472.86	5578.59	8795.63	2.15e-15	2.97e-14	3.26e-10	4.41e-09	1.03e-09	1.06e-08	2.38e-05	8.07e-05	protein_coding	9144
PRICKLE3	ENSG00000012211	217.394	459.654	486.367	2.36e-15	3.25e-14	4.85e-14	1.98e-12	1.51e-06	3.44e-06	0.886844	0.387734	protein_coding	4007
NUS1	ENSG00000153989	2462.73	1832.75	7343.12	2.42e-15	3.32e-14	3.14e-06	1.37e-05	6.45e-12	9.05e-10	1.52e-10	2.17e-08	protein_coding	116150
QARS	ENSG00000172053	3398.01	5640.01	6151.65	2.47e-15	3.38e-14	3.09e-13	9.89e-12	1.9e-07	6.17e-07	0.262788	0.17118	protein_coding	102465536
QARS	ENSG00000172053	3398.01	5640.01	6151.65	2.47e-15	3.38e-14	3.09e-13	9.89e-12	1.9e-07	6.17e-07	0.262788	0.17118	protein_coding	5859
HBA2	ENSG00000188536	207.366	2158.52	-489.579	2.5e-15	3.41e-14	2.5e-15	1.51e-13	0.121369	0.0512005	8.18e-07	4.89e-06	protein_coding	3040
MT-CO1	ENSG00000198804	163102	278281	402613	2.77e-15	3.75e-14	2.45e-10	3.44e-09	1.89e-09	1.65e-08	2.52e-05	8.42e-05	protein_coding	4512
UBE2B	ENSG00000119048	1178.72	1678	2233.89	2.8e-15	3.78e-14	5.82e-11	9.95e-10	3.06e-09	2.36e-08	0.000746649	0.00149569	protein_coding	7320
S100A6	ENSG00000197956	9659.85	30222.9	26923.8	2.83e-15	3.81e-14	7.6e-15	3.87e-13	4.66e-05	6.14e-05	0.0985554	0.0816873	protein_coding	6277
ZNF585A	ENSG00000196967	257.941	973.586	1089.31	3.11e-15	4.17e-14	4.61e-14	1.93e-12	2.37e-06	5.02e-06	0.975322	0.40949	protein_coding	199704
SENCR	ENSG00000254703	24.9549	-18.538	-1.06145	3.12e-15	4.17e-14	1.91e-13	6.39e-12	1.16e-06	2.75e-06	0.0022874	0.00380065	antisense	100507392
ZNF420	ENSG00000197050	215.62	727.366	846.699	3.14e-15	4.18e-14	6.46e-14	2.5e-12	1.56e-06	3.54e-06	0.771217	0.356672	protein_coding	147923
FOSB	ENSG00000125740	985.809	6542.26	383.893	3.2e-15	4.24e-14	1.7e-15	1.05e-13	0.911526	0.261782	7.68e-07	4.62e-06	protein_coding	2354
	ENSG00000260404	216.514	138.253	464.125	3.33e-15	4.4e-14	1.26e-07	8.31e-07	5.78e-10	7.01e-09	2.1e-10	2.17e-08	transcribed_unprocessed_pseudogene
	ENSG00000218018	15.497	8.5478	2.0153	3.35e-15	4.4e-14	7.53e-09	6.98e-08	4.25e-11	1.39e-09	5.94e-05	0.000173913	antisense
RET	ENSG00000165731	565.352	-377.771	-218.092	3.37e-15	4.41e-14	1.68e-13	5.76e-12	5.17e-07	1.42e-06	0.484478	0.264145	protein_coding	5979
COX5A	ENSG00000178741	1729.43	2919.23	3159.31	3.61e-15	4.7e-14	1.17e-13	4.22e-12	9.17e-07	2.26e-06	0.607594	0.306939	protein_coding	9377
TRHDE	ENSG00000072657	-19.6943	482.867	665.255	3.62e-15	4.7e-14	2.71e-15	1.62e-13	0.000128064	0.000144996	0.540206	0.285132	protein_coding	29953
FASLG	ENSG00000117560	50.1511	-12.9088	6.7975	3.68e-15	4.77e-14	5.25e-14	2.1e-12	8.04e-06	1.4e-05	0.0126557	0.0156944	protein_coding	356
FAIM2	ENSG00000135472	399.61	-171.592	-40.0227	3.71e-15	4.79e-14	8.62e-13	2.43e-11	7.21e-08	2.74e-07	0.0298862	0.0319219	protein_coding	23017
PTGES	ENSG00000148344	157.238	719.234	832.435	3.98e-15	5.11e-14	1.17e-13	4.22e-12	1.05e-06	2.53e-06	0.633797	0.31526	protein_coding	9536
AADAC	ENSG00000114771	31.1331	275.361	209.54	4.02e-15	5.15e-14	1.11e-14	5.4e-13	5.21e-05	6.74e-05	0.0778564	0.0679216	protein_coding	13
	ENSG00000261116	89.0247	19.4095	565.78	4.26e-15	5.44e-14	5.21e-06	2.12e-05	6.16e-12	9.05e-10	2.27e-10	2.17e-08	sense_overlapping
MLK7-AS1	ENSG00000238133	-4.05685	43.2245	39.6849	4.5e-15	5.72e-14	6.14e-14	2.39e-12	2.78e-06	5.75e-06	0.857608	0.3797	antisense	339751
LPCAT4	ENSG00000176454	463.139	948.276	938.08	4.52e-15	5.72e-14	2.33e-14	1.04e-12	1.19e-05	1.94e-05	0.469148	0.258772	protein_coding	254531
FXYD2	ENSG00000137731	261.793	-109.402	2451.76	5.26e-15	6.64e-14	7.91e-07	4.14e-06	1.32e-10	2.61e-09	1.65e-10	2.17e-08	protein_coding	486
TNFSF15	ENSG00000181634	505.623	-126.925	-3.58028	5.55e-15	6.98e-14	4.98e-14	2.02e-12	1.26e-05	2.05e-05	0.0348819	0.036109	protein_coding	9966
ZSCAN16-AS1	ENSG00000269293	98.6343	267.674	260.615	5.95e-15	7.45e-14	2.15e-14	9.71e-13	1.97e-05	2.97e-05	0.484478	0.264145	antisense	100129195
TBC1D15	ENSG00000121749	1115.77	1776.65	2031.29	6.12e-15	7.64e-14	1.08e-12	2.97e-11	1.65e-07	5.48e-07	0.171531	0.125203	protein_coding	64786
DCPS	ENSG00000110063	286.015	401.167	1119.14	6.31e-15	7.85e-14	5.13e-06	2.1e-05	1.06e-11	9.05e-10	2.67e-10	2.17e-08	protein_coding	28960
QPCTL	ENSG00000011478	310.121	642.717	631.551	6.61e-15	8.2e-14	4.73e-14	1.97e-12	7.56e-06	1.33e-05	0.642636	0.318392	protein_coding	54814
TNFSF10	ENSG00000121858	2091.29	7298.5	7254.87	7.13e-15	8.77e-14	6.3e-14	2.44e-12	5.91e-06	1.08e-05	0.598968	0.304274	protein_coding	8743
ATP1A4	ENSG00000132681	26.3719	-13.0812	-2.37892	7.14e-15	8.77e-14	3.56e-12	8.51e-11	2.13e-08	1.03e-07	0.47678	0.261455	protein_coding	480
TRAPPC1	ENSG00000170043	928.035	1279.98	1624.7	7.15e-15	8.77e-14	3.44e-11	6.25e-10	1.2e-08	6.69e-08	0.003166	0.00497921	protein_coding	58485
CHST2	ENSG00000175040	545.472	1307.23	3732.45	7.34e-15	8.97e-14	1.85e-08	1.56e-07	3.09e-10	4.53e-09	3.11e-07	2.2e-06	protein_coding	9435
	ENSG00000255438	4.46758	8.21518	17.9225	7.57e-15	9.22e-14	6.52e-07	3.51e-06	1.22e-11	9.05e-10	9.33e-08	8.4e-07	antisense
RPA1	ENSG00000132383	1740.25	2872.66	2960.41	7.75e-15	9.4e-14	2.59e-14	1.15e-12	2.03e-05	3.05e-05	0.696704	0.33516	protein_coding	6117
PRSS3	ENSG00000010438	-5.89124	174.508	118.277	7.8e-15	9.43e-14	3.76e-15	2.1e-13	0.000964342	0.000818732	0.0359623	0.0369467	protein_coding	5646
RRP9	ENSG00000114767	519.662	878.929	1524.68	8e-15	9.64e-14	9.98e-09	9e-08	3.65e-10	5.11e-09	1.73e-06	9.11e-06	protein_coding	9136
CDKN2C	ENSG00000123080	411.487	1303.53	1098.56	8.24e-15	9.89e-14	3.66e-15	2.07e-13	0.000727072	0.000641421	0.0821203	0.070729	protein_coding	1031
RPL38	ENSG00000172809	6362.52	11909.9	10685.7	8.3e-15	9.93e-14	3.47e-15	1.98e-13	0.000519167	0.000479895	0.191746	0.136328	protein_coding	6169
SFXN4	ENSG00000183605	428.858	774.724	832.566	8.64e-15	1.03e-13	7.55e-14	2.88e-12	5.56e-06	1.03e-05	0.995064	0.41464	protein_coding	119559
ANKRD2	ENSG00000165887	5.96842	95.8314	189.328	8.7e-15	1.03e-13	4.74e-11	8.29e-10	1.69e-08	8.63e-08	0.000746649	0.00149569	protein_coding	26287
RSPH1	ENSG00000160188	452.654	-107.78	286.316	8.88e-15	1.05e-13	1.48e-14	7.06e-13	0.00780963	0.00493866	1.22e-05	4.61e-05	protein_coding	89765
UXS1	ENSG00000115652	1088.29	1511.35	2354.24	8.92e-15	1.05e-13	1.71e-08	1.46e-07	2.61e-10	4.06e-09	1.35e-06	7.36e-06	protein_coding	80146
	ENSG00000279377	229.914	58.862	14.8061	9.6e-15	1.13e-13	5.9e-12	1.31e-10	5.8e-08	2.31e-07	0.0484255	0.0469206	TEC
CCL4	ENSG00000277943	141.794	458.609	109.382	1.01e-14	1.18e-13	1.93e-14	8.82e-13	0.661445	0.205297	6.62e-08	6.4e-07	protein_coding	6351
DYRK1B	ENSG00000105204	657.563	1790.94	1909.43	1.05e-14	1.23e-13	1.68e-13	5.76e-12	3.06e-06	6.23e-06	0.424808	0.2414	protein_coding	9149
S100A14	ENSG00000189334	687.4	3031.93	1964.13	1.16e-14	1.35e-13	1.16e-15	7.61e-14	0.013988	0.00813687	0.0166511	0.0197276	protein_coding	57402
MT-ND4L	ENSG00000212907	9351.08	18218.5	20100.7	1.16e-14	1.35e-13	1.48e-12	3.91e-11	2.18e-07	6.96e-07	0.424808	0.2414	protein_coding	4539
	ENSG00000261888	23.9104	136.646	176.868	1.17e-14	1.35e-13	2.3e-12	5.75e-11	1.53e-07	5.15e-07	0.21366	0.14766	lincRNA
TPBGL	ENSG00000261594	68.4227	234.816	150.367	1.21e-14	1.4e-13	4.93e-15	2.67e-13	0.00558321	0.00371517	0.00219492	0.00367068	protein_coding	100507050
CXCL16	ENSG00000161921	1623.34	2854.59	3089.65	1.24e-14	1.43e-13	1.06e-13	3.86e-12	6.49e-06	1.17e-05	0.76177	0.353981	protein_coding	58191
SIGLEC15	ENSG00000197046	204.808	-73.5191	15.5738	1.3e-14	1.49e-13	1.1e-12	3.03e-11	5e-07	1.38e-06	0.0140418	0.0171245	protein_coding	284266
FNDC10	ENSG00000228594	195.414	433.373	771.655	1.34e-14	1.53e-13	7.92e-10	9.56e-09	2.51e-09	2.02e-08	0.000122009	0.000318331	protein_coding	643988
	ENSG00000250575	67.7362	34.5507	190.361	1.35e-14	1.54e-13	7.77e-07	4.08e-06	2.3e-10	3.78e-09	5.9e-10	2.55e-08	unprocessed_pseudogene
SMIM6	ENSG00000259120	154.162	-65.256	50.4317	1.36e-14	1.54e-13	1.06e-13	3.86e-12	5.51e-05	7.06e-05	0.00144133	0.00260763	protein_coding	100130933
BRMS1L	ENSG00000100916	262.031	420.558	496.69	1.36e-14	1.54e-13	1.23e-11	2.46e-10	3.21e-08	1.44e-07	0.0912158	0.0769602	protein_coding	84312
UPK3B	ENSG00000243566	149.28	1265.77	1151.27	1.41e-14	1.59e-13	6.14e-14	2.39e-12	2.22e-05	3.28e-05	0.247294	0.163887	protein_coding	80761
UPK3B	ENSG00000243566	149.28	1265.77	1151.27	1.41e-14	1.59e-13	6.14e-14	2.39e-12	2.22e-05	3.28e-05	0.247294	0.163887	protein_coding	105375355
RHCE	ENSG00000188672	20.5916	73.026	80.9829	1.43e-14	1.61e-13	3.97e-13	1.23e-11	1.41e-06	3.25e-06	0.724349	0.343255	protein_coding	6006
TMEM208	ENSG00000168701	475.992	680.134	1119.36	1.47e-14	1.65e-13	4.44e-08	3.34e-07	1.5e-10	2.86e-09	2.35e-06	1.17e-05	protein_coding	29100
TEX30	ENSG00000151287	187.156	294.034	446.792	1.48e-14	1.65e-13	1.57e-09	1.77e-08	1.49e-09	1.38e-08	9.46e-05	0.000257225	protein_coding	93081
EML2	ENSG00000125746	531.401	818.634	1418.08	1.49e-14	1.65e-13	4.33e-10	5.65e-09	5.99e-09	3.95e-08	9.46e-05	0.000257225	protein_coding	442902
EML2	ENSG00000125746	531.401	818.634	1418.08	1.49e-14	1.65e-13	4.33e-10	5.65e-09	5.99e-09	3.95e-08	9.46e-05	0.000257225	protein_coding	24139
SHKBP1	ENSG00000160410	994.173	1761.87	2098.38	1.53e-14	1.69e-13	2.93e-13	9.47e-12	2.29e-06	4.89e-06	0.573431	0.296371	protein_coding	92799
STXBP1	ENSG00000136854	496.639	988.994	1121.87	1.53e-14	1.69e-13	3.33e-13	1.06e-11	1.95e-06	4.26e-06	0.660467	0.323849	protein_coding	6812
CXCL5	ENSG00000163735	824.87	-183.129	-377.195	1.54e-14	1.69e-13	5.36e-12	1.21e-10	7.21e-08	2.74e-07	0.295754	0.186681	protein_coding	6374
TK1	ENSG00000167900	767.402	1676.2	1533.63	1.65e-14	1.8e-13	5.65e-15	2.98e-13	0.000645255	0.000578511	0.262788	0.17118	protein_coding	7083
EIF3H	ENSG00000147677	5945.6	11384.8	13101.2	1.65e-14	1.8e-13	4.98e-13	1.52e-11	1.36e-06	3.16e-06	0.484478	0.264145	protein_coding	8667
CCDC124	ENSG00000007080	847.944	1484.05	1695.08	1.68e-14	1.83e-13	3.87e-13	1.21e-11	1.83e-06	4.05e-06	0.733647	0.345962	protein_coding	115098
MALRD1	ENSG00000204740	-0.742999	47.9298	40.3343	1.69e-14	1.84e-13	2.28e-13	7.53e-12	4.33e-06	8.34e-06	0.363101	0.216479	protein_coding	340895
CCDC47	ENSG00000108588	2827.19	4251.39	6286.81	1.94e-14	2.09e-13	2.61e-10	3.62e-09	1.16e-08	6.5e-08	0.000190956	0.000465573	protein_coding	57003
PCAT19	ENSG00000267107	138.765	-40.09	76.896	1.96e-14	2.11e-13	2.8e-14	1.23e-12	0.00363094	0.00256489	0.000104811	0.000280897	lincRNA	100505495
MRPL2	ENSG00000112651	541.223	911.093	970.502	2e-14	2.14e-13	1e-13	3.76e-12	1.3e-05	2.1e-05	0.975322	0.40949	protein_coding	51069
MIA	ENSG00000261857	63.2492	-41.1228	99.6594	2e-14	2.14e-13	2.15e-14	9.71e-13	0.131085	0.0546623	1.27e-06	6.99e-06	protein_coding	8190
ATP6V0C	ENSG00000185883	2437.65	3071.59	6131.78	2.1e-14	2.24e-13	1.92e-05	6.73e-05	6.75e-12	9.05e-10	1.62e-09	4.54e-08	protein_coding	527
CHMP6	ENSG00000176108	376.552	529.645	877.18	2.11e-14	2.25e-13	7.72e-08	5.48e-07	2.3e-10	3.78e-09	5.23e-07	3.33e-06	protein_coding	79643
COL11A2	ENSG00000204248	7.98082	83.0165	83.3745	2.15e-14	2.27e-13	1.06e-13	3.86e-12	1.43e-05	2.27e-05	0.809332	0.366774	protein_coding	1302
COL11A2	ENSG00000230930	7.98082	83.0165	83.3745	2.15e-14	2.27e-13	1.06e-13	3.86e-12	1.43e-05	2.27e-05	0.809332	0.366774	protein_coding	1302
PRPF19	ENSG00000110107	2287.21	3649.47	3549.29	2.26e-14	2.38e-13	4.85e-14	1.98e-12	5.99e-05	7.6e-05	0.284471	0.181251	protein_coding	27339
IGLV3-21	ENSG00000211662	1260.27	9548.75	1691.22	2.29e-14	2.41e-13	3.66e-15	2.07e-13	0.472159	0.157521	2.13e-05	7.35e-05	IG_V_gene
LTB	ENSG00000231314	15.5703	67.5724	26.5832	2.42e-14	2.53e-13	3.76e-15	2.1e-13	0.694936	0.213479	2.66e-05	8.82e-05	protein_coding	4050
PCDH10	ENSG00000138650	-3.22474	467.63	441.829	2.42e-14	2.53e-13	5.53e-14	2.2e-12	4.16e-05	5.59e-05	0.633797	0.31526	protein_coding	57575
PSMA1	ENSG00000129084	2118.55	3047.43	3769.2	2.45e-14	2.55e-13	6.38e-11	1.07e-09	2.29e-08	1.09e-07	0.00824671	0.011086	protein_coding	5682
EPS15L1	ENSG00000127527	617.409	944.759	1213.29	2.47e-14	2.56e-13	3.94e-11	7.05e-10	4.32e-08	1.83e-07	0.00636395	0.00894704	protein_coding	58513
MYDGF	ENSG00000074842	1444.97	2166.87	2808.82	2.48e-14	2.57e-13	1.23e-10	1.91e-09	1.3e-08	7.11e-08	0.00506834	0.0074042	protein_coding	56005
MFSD4A	ENSG00000174514	376.905	-45.2569	208.219	2.64e-14	2.73e-13	7.6e-15	3.87e-13	0.00876788	0.00544838	0.00329518	0.00515003	protein_coding	148808
CAPNS1	ENSG00000126247	4800.38	7347.39	9976.84	2.65e-14	2.73e-13	2.99e-11	5.58e-10	5.39e-08	2.17e-07	0.0118003	0.0148624	protein_coding	826
GALNT8	ENSG00000130035	125.648	-35.6037	2.70821	2.74e-14	2.81e-13	1.27e-13	4.52e-12	3.23e-05	4.52e-05	0.0865716	0.0737877	protein_coding	26290
GALNT8	ENSG00000130035	125.648	-35.6037	2.70821	2.74e-14	2.81e-13	1.27e-13	4.52e-12	3.23e-05	4.52e-05	0.0865716	0.0737877	protein_coding	3742
ELOVL3	ENSG00000119915	20.6069	150.503	95.9481	2.78e-14	2.84e-13	7.8e-15	3.95e-13	0.00681106	0.00438918	0.00568293	0.00814155	protein_coding	83401
PDZK1	ENSG00000174827	237.051	-105.619	213.479	2.81e-14	2.87e-13	5.96e-15	3.13e-13	0.2527	0.0945621	3.88e-05	0.000120915	protein_coding	5174
PSMB2	ENSG00000126067	2084.44	3216.21	3783.24	2.83e-14	2.88e-13	2.19e-12	5.5e-11	5.93e-07	1.59e-06	0.163908	0.120973	protein_coding	5690
PBX2	ENSG00000206315	100.71	441.933	544.689	2.92e-14	2.96e-13	4.26e-14	1.81e-12	0.00013504	0.000151763	0.152955	0.114792	protein_coding	5089
MAP2K3	ENSG00000034152	1020.01	1471.5	2042.12	3.02e-14	3.05e-13	2.85e-10	3.93e-09	1.3e-08	7.11e-08	0.00062312	0.00127922	protein_coding	5606
SNX8	ENSG00000106266	528.551	827.304	1163.62	3.05e-14	3.07e-13	6.67e-10	8.27e-09	6.73e-09	4.32e-08	0.00028156	0.000647299	protein_coding	102465503
SNX8	ENSG00000106266	528.551	827.304	1163.62	3.05e-14	3.07e-13	6.67e-10	8.27e-09	6.73e-09	4.32e-08	0.00028156	0.000647299	protein_coding	29886
ATP6V1H	ENSG00000047249	1307.56	1937.87	2643.99	3.08e-14	3.09e-13	9.8e-11	1.55e-09	2.38e-08	1.13e-07	0.00417633	0.00627828	protein_coding	51606
RPL28	ENSG00000108107	11372.7	20176.4	22199.6	3.17e-14	3.18e-13	1.76e-12	4.53e-11	7.26e-07	1.87e-06	0.469148	0.258772	protein_coding	6158
RPL28	ENSG00000108107	11372.7	20176.4	22199.6	3.17e-14	3.18e-13	1.76e-12	4.53e-11	7.26e-07	1.87e-06	0.469148	0.258772	protein_coding	102465483
GPN3	ENSG00000111231	497.407	671.946	843.394	3.19e-14	3.18e-13	4.42e-10	5.76e-09	5.99e-09	3.95e-08	0.00185823	0.00319886	protein_coding	51184
CLPTM1L	ENSG00000049656	2015.05	2948.05	3698.9	3.48e-14	3.46e-13	2.24e-10	3.16e-09	9.92e-09	5.74e-08	0.00568293	0.00814155	protein_coding	81037
CHERP	ENSG00000085872	1321.94	1957.26	2657.67	3.58e-14	3.56e-13	2.1e-10	2.99e-09	1.57e-08	8.14e-08	0.00202015	0.0034279	protein_coding	10523
SLC38A4	ENSG00000139209	196.528	-58.2868	874.995	3.65e-14	3.61e-13	4.71e-08	3.52e-07	1.43e-07	4.86e-07	1.65e-10	2.17e-08	protein_coding	55089
MTFR2	ENSG00000146410	88.22	160.454	196.822	3.7e-14	3.65e-13	2.19e-12	5.5e-11	8.03e-07	2.03e-06	0.222914	0.152373	protein_coding	113115
SNRPF	ENSG00000139343	895.444	1376.14	1519.83	3.78e-14	3.73e-13	6.39e-13	1.86e-11	3.16e-06	6.41e-06	0.616274	0.309602	protein_coding	6636
KLF2	ENSG00000127528	242.751	783.253	458.502	3.86e-14	3.79e-13	2.79e-15	1.65e-13	0.0407762	0.020298	0.00855294	0.0114	protein_coding	10365
RXFP1	ENSG00000171509	1003.7	20.3267	6480.62	3.98e-14	3.9e-13	5.29e-06	2.16e-05	1.06e-10	2.32e-09	6.38e-10	2.63e-08	protein_coding	59350
THOC7	ENSG00000163634	976.457	1629.83	1560.25	4.11e-14	4.01e-13	8.82e-14	3.33e-12	7.89e-05	9.57e-05	0.179417	0.12942	protein_coding	80145
PSMD11	ENSG00000108671	1420.5	2245.32	2735.25	4.19e-14	4.08e-13	6.81e-12	1.48e-10	2.99e-07	9.01e-07	0.103705	0.08496	protein_coding	5717
TUBB4A	ENSG00000104833	76.2174	332.024	432.751	4.34e-14	4.2e-13	6.19e-12	1.36e-10	3.09e-07	9.27e-07	0.167687	0.123037	protein_coding	10382
CSNK1D	ENSG00000141551	3007.69	3584.54	6879.1	4.34e-14	4.2e-13	3.03e-05	0.000100688	1.67e-11	9.13e-10	5.45e-10	2.53e-08	protein_coding	1453
EMC2	ENSG00000104412	773.202	1378.86	1808.55	4.49e-14	4.33e-13	1.75e-11	3.39e-10	1.28e-07	4.43e-07	0.0559087	0.0524595	protein_coding	9694
DNPH1	ENSG00000112667	679.012	1238.52	1248.62	4.58e-14	4.41e-13	1.06e-13	3.86e-12	4.53e-05	6e-05	0.669456	0.326649	protein_coding	10591
AKT1S1	ENSG00000204673	814.726	1065.49	1732.93	4.79e-14	4.6e-13	4.11e-07	2.36e-06	1.71e-10	3.15e-09	1.83e-07	1.44e-06	protein_coding	84335
TMEM35B	ENSG00000243749	480.22	768.867	1149.06	5.01e-14	4.8e-13	1.64e-08	1.41e-07	7.73e-10	8.72e-09	4.1e-05	0.000126211	protein_coding	100506144
PSMB8	ENSG00000230034	146.764	533.206	601.082	5.16e-14	4.92e-13	9.05e-13	2.54e-11	3.16e-06	6.41e-06	0.87708	0.385064	protein_coding	5696
MYADM	ENSG00000179820	2034.72	3248.77	5500.91	5.23e-14	4.97e-13	3.33e-08	2.59e-07	7.73e-10	8.72e-09	5.76e-06	2.47e-05	protein_coding	91663
NAA60	ENSG00000122390	971.424	774.149	1661.22	5.25e-14	4.98e-13	1.77e-06	8.42e-06	1.16e-09	1.15e-08	3.39e-10	2.17e-08	protein_coding	79903
	ENSG00000269600	0.376405	24.2613	27.5037	5.26e-14	4.98e-13	5.24e-12	1.18e-10	3.67e-07	1.07e-06	0.548421	0.288139	antisense
HBA1	ENSG00000206172	144.526	1189.98	-535.908	5.38e-14	5.08e-13	2.65e-13	8.62e-12	0.0186229	0.0103738	6.76e-07	4.15e-06	protein_coding	3039
ESRRB	ENSG00000119715	-1.08079	62.4133	126.891	5.49e-14	5.16e-13	3.68e-11	6.64e-10	1.71e-07	5.66e-07	0.00258669	0.00421479	protein_coding	2103
FABP5	ENSG00000164687	2059.15	-28.2848	667.55	5.49e-14	5.16e-13	1.81e-13	6.13e-12	0.000124705	0.00014163	0.0113921	0.0144445	protein_coding	2171
USE1	ENSG00000053501	333.67	569.991	686.987	5.66e-14	5.3e-13	4.87e-12	1.12e-10	4.67e-07	1.3e-06	0.461585	0.255926	protein_coding	55850
OCIAD2	ENSG00000145247	1050.24	2118.63	1710.02	5.76e-14	5.38e-13	6.64e-15	3.45e-13	0.00796252	0.00501857	0.0528072	0.0501641	protein_coding	132299
CNTD2	ENSG00000105219	13.7043	134.402	34.6646	5.9e-14	5.5e-13	1.33e-15	8.45e-14	0.286702	0.104744	0.00568293	0.00814155	protein_coding	79935
FXYD5	ENSG00000089327	558.791	1402.91	1003.6	6.02e-14	5.59e-13	9.94e-15	4.93e-13	0.00667818	0.00431565	0.030833	0.0327257	protein_coding	53827
RHOXF1-AS1	ENSG00000258545	11.9626	112.321	150.213	6.05e-14	5.61e-13	6.34e-12	1.39e-10	4.67e-07	1.3e-06	0.183459	0.131649	antisense	101928969
TSTA3	ENSG00000278243	1050.9	2913.36	2322.08	6.19e-14	5.72e-13	4.04e-14	1.74e-12	0.000920371	0.000787736	0.0338293	0.035228	protein_coding	7264
SNHG6	ENSG00000245910	1183.18	2208.35	2258.31	6.34e-14	5.84e-13	2.28e-13	7.53e-12	2.56e-05	3.71e-05	0.828566	0.372105	processed_transcript
LEFTY1	ENSG00000243709	10101.3	-2582.73	31909.2	6.42e-14	5.9e-13	3.83e-12	9.08e-11	0.00054502	0.000500156	3.55e-07	2.46e-06	protein_coding	10637
RSPO1	ENSG00000169218	116.15	1018.41	1042.07	6.87e-14	6.3e-13	1.02e-12	2.84e-11	4.33e-06	8.34e-06	0.573431	0.296371	protein_coding	284654
SLC7A5	ENSG00000103257	3217.88	-633.015	2204.43	6.93e-14	6.34e-13	3.86e-15	2.14e-13	0.178162	0.0707684	0.00185823	0.00319886	protein_coding	8140
ZNF295-AS1	ENSG00000237232	59.7391	-31.319	7.17881	7.19e-14	6.56e-13	3.5e-13	1.11e-11	3.94e-05	5.33e-05	0.0591604	0.0547784	lincRNA	150142
MARK4	ENSG00000007047	654.173	931.619	1399.91	7.33e-14	6.67e-13	1.01e-07	6.85e-07	4.51e-10	5.88e-09	3.38e-06	1.58e-05	protein_coding	57787
SLC28A1	ENSG00000156222	3.40269	27.1049	37.2402	7.41e-14	6.72e-13	3.56e-12	8.51e-11	1.08e-06	2.6e-06	0.337575	0.205303	protein_coding	9154
PSME3	ENSG00000131467	1881.71	2682.68	3729.26	7.43e-14	6.72e-13	1.16e-09	1.35e-08	1.03e-08	5.91e-08	0.000431	0.000931022	protein_coding	10197
MRPL15	ENSG00000137547	1421.1	2257.71	2892.36	7.74e-14	6.98e-13	1.97e-11	3.79e-10	2.34e-07	7.37e-07	0.0575155	0.0536088	protein_coding	29088
NUP50-AS1	ENSG00000226328	140.342	183.516	588.179	7.83e-14	7.04e-13	0.000109582	0.000307567	1.6e-11	9.05e-10	1.65e-10	2.17e-08	lincRNA
BRI3	ENSG00000164713	1451.28	2066.36	3070.96	7.9e-14	7.09e-13	8.65e-08	5.99e-07	4.7e-10	6e-09	6.11e-06	2.6e-05	protein_coding	25798
TECR	ENSG00000099797	1557.93	3359.69	3050.61	8.15e-14	7.3e-13	5.53e-14	2.2e-12	0.000300973	0.000301618	0.383017	0.224652	protein_coding	693224
TECR	ENSG00000099797	1557.93	3359.69	3050.61	8.15e-14	7.3e-13	5.53e-14	2.2e-12	0.000300973	0.000301618	0.383017	0.224652	protein_coding	9524
KRT13	ENSG00000171401	219.645	-212.835	137.156	8.65e-14	7.72e-13	4.85e-14	1.98e-12	0.112225	0.0479273	1.15e-05	4.4e-05	protein_coding	3860
MMP10	ENSG00000166670	1053.32	-970.205	665.612	8.71e-14	7.75e-13	1.33e-14	6.41e-13	0.367067	0.128468	7.7e-05	0.000216169	protein_coding	4319
TMEM14A	ENSG00000096092	552.252	978.476	922.654	8.77e-14	7.79e-13	4.49e-14	1.89e-12	0.00045945	0.000432985	0.343846	0.207997	protein_coding	28978
CTBS	ENSG00000117151	581.107	755.918	1205.98	9.03e-14	8e-13	2.23e-07	1.37e-06	7.73e-10	8.72e-09	1.5e-07	1.23e-06	protein_coding	1486
LRRC46	ENSG00000141294	172.852	-53.5133	57.1106	9.6e-14	8.48e-13	1.72e-12	4.43e-11	3.83e-05	5.21e-05	0.000122009	0.000318331	protein_coding	90506
TBX15	ENSG00000092607	331.103	89.0074	2148.23	9.62e-14	8.48e-13	3.82e-06	1.63e-05	1.86e-10	3.32e-09	3.2e-09	7e-08	protein_coding	6913
ALG3	ENSG00000214160	876.302	1423.36	1616.02	9.69e-14	8.52e-13	4.12e-12	9.62e-11	1.32e-06	3.07e-06	0.343846	0.207997	protein_coding	10195
BCAP31	ENSG00000185825	4037.77	7018.72	7913	9.75e-14	8.55e-13	4.02e-12	9.43e-11	1.24e-06	2.91e-06	0.598968	0.304274	protein_coding	10134
LPCAT1	ENSG00000275079	751.189	1375.39	1858.96	9.83e-14	8.58e-13	1.54e-10	2.27e-09	4.32e-08	1.83e-07	0.0172213	0.0203199	protein_coding	79888
PQBP1	ENSG00000102103	774.153	1298.44	1407.61	9.84e-14	8.58e-13	5.93e-13	1.76e-11	1.34e-05	2.15e-05	0.799757	0.364306	protein_coding	10084
GPX4	ENSG00000167468	2947.48	3899.48	7117.16	9.88e-14	8.6e-13	1.26e-06	6.26e-06	1.94e-10	3.39e-09	7.09e-08	6.73e-07	protein_coding	2879
TYMS	ENSG00000176890	792.939	1478.04	1639.35	9.9e-14	8.6e-13	1.38e-12	3.68e-11	4.76e-06	9.02e-06	0.995064	0.41464	protein_coding	7298
NPAS2	ENSG00000170485	670.103	1535.51	3212.94	9.94e-14	8.61e-13	2.15e-09	2.33e-08	1.97e-08	9.74e-08	2.26e-05	7.69e-05	protein_coding	4862
PSMC4	ENSG00000013275	1776.7	4633.26	4363.41	9.99e-14	8.63e-13	2.93e-13	9.47e-12	4.28e-05	5.73e-05	0.469148	0.258772	protein_coding	5704
PDRG1	ENSG00000088356	579.295	952.688	960.877	1e-13	8.65e-13	1.33e-13	4.71e-12	0.000109117	0.000126276	0.607594	0.306939	protein_coding	81572
TRABD2B	ENSG00000269113	59.4902	7.36676	754.366	1.02e-13	8.76e-13	0.000494818	0.00113755	7.06e-12	9.05e-10	1.01e-10	2.17e-08	protein_coding	388630
CA9	ENSG00000107159	351.354	1055.06	-133.749	1.05e-13	9.04e-13	1.2e-11	2.41e-10	6.69e-05	8.34e-05	1.19e-06	6.67e-06	protein_coding	768
MTHFD1L	ENSG00000120254	793.408	1074.78	1836.71	1.08e-13	9.24e-13	3.38e-07	1.98e-06	5.55e-10	6.8e-09	2.24e-07	1.7e-06	protein_coding	25902
BARX2	ENSG00000043039	89.066	544.214	468.937	1.11e-13	9.46e-13	5.37e-13	1.61e-11	2.49e-05	3.62e-05	0.325256	0.199937	protein_coding	8538
MTCO1P12	ENSG00000237973	5289.25	721.5	7503.81	1.12e-13	9.49e-13	4.22e-12	9.83e-11	0.011005	0.00662955	3.3e-08	3.76e-07	unprocessed_pseudogene
	ENSG00000260091	13.6669	6.85808	31.5795	1.13e-13	9.56e-13	8.05e-07	4.21e-06	7.56e-09	4.73e-08	5.9e-10	2.55e-08	lincRNA
LRFN1	ENSG00000128011	94.0524	270.553	328.645	1.13e-13	9.56e-13	1.28e-12	3.47e-11	6.29e-06	1.14e-05	0.847904	0.377188	protein_coding	57622
ATP1A2	ENSG00000018625	1481.49	-1263.19	711.53	1.19e-13	1e-12	8.38e-14	3.17e-12	0.0145053	0.00839546	0.000149103	0.000377539	protein_coding	477
	ENSG00000228897	13.7666	7.40495	27.5053	1.19e-13	1e-12	4.53e-08	3.4e-07	1.04e-07	3.72e-07	3.2e-09	7e-08	processed_pseudogene
MRPL39	ENSG00000154719	459.32	696.927	850.233	1.22e-13	1.03e-12	4.85e-11	8.45e-10	1.59e-07	5.31e-07	0.0498508	0.0479655	protein_coding	54148
SRF	ENSG00000112658	1397.23	1850.09	2553.13	1.25e-13	1.05e-12	7.3e-08	5.19e-07	9.89e-10	1.03e-08	6.86e-06	2.86e-05	protein_coding	6722
MED10	ENSG00000133398	474.453	784.234	852.506	1.3e-13	1.09e-12	2.14e-12	5.42e-11	4.07e-06	7.92e-06	0.724349	0.343255	protein_coding	84246
CD1D	ENSG00000158473	35.1882	131.262	95.9124	1.37e-13	1.14e-12	3.01e-13	9.68e-12	0.000180262	0.000194311	0.0318054	0.0335502	protein_coding	912
TMEM88	ENSG00000167874	13.8187	87.7492	107.394	1.37e-13	1.14e-12	3.97e-13	1.23e-11	3.61e-05	4.96e-05	0.945741	0.40245	protein_coding	92162
TATDN1	ENSG00000147687	756.244	1678.99	2015.5	1.38e-13	1.14e-12	7.15e-12	1.54e-10	1.01e-06	2.46e-06	0.515936	0.275826	protein_coding	102466200
TATDN1	ENSG00000147687	756.244	1678.99	2015.5	1.38e-13	1.14e-12	7.15e-12	1.54e-10	1.01e-06	2.46e-06	0.515936	0.275826	protein_coding	83940
BTNL8	ENSG00000113303	3.54617	57.0161	52.717	1.38e-13	1.14e-12	1.08e-12	2.97e-11	1.19e-05	1.94e-05	0.515936	0.275826	protein_coding	79908
ESD	ENSG00000139684	1271.89	1772.15	2204.67	1.38e-13	1.14e-12	2.29e-10	3.22e-09	4.83e-08	2e-07	0.0122214	0.0152806	protein_coding	2098
FARSB	ENSG00000116120	993.512	1475.07	1749.85	1.42e-13	1.16e-12	2.73e-11	5.11e-10	3.67e-07	1.07e-06	0.0559087	0.0524595	protein_coding	10056
NEXN	ENSG00000162614	161.873	438.431	448.566	1.43e-13	1.16e-12	2.48e-12	6.11e-11	3.82e-06	7.49e-06	0.857608	0.3797	protein_coding	91624
	ENSG00000280035	9.75151	4.0018	48.4405	1.43e-13	1.16e-12	0.00014656	0.000396322	2.73e-11	1.12e-09	2.46e-10	2.17e-08	TEC
IGLV2-11	ENSG00000211668	246.53	3669.73	-2922.42	1.43e-13	1.16e-12	1.59e-13	5.55e-12	0.00708396	0.00454393	2.66e-05	8.82e-05	IG_V_gene
CISD3	ENSG00000277972	399.612	716.508	841.575	1.44e-13	1.17e-12	4.87e-12	1.12e-10	2.02e-06	4.38e-06	0.232451	0.15689	protein_coding	284106
	ENSG00000225431	80.0263	14.4842	715.51	1.51e-13	1.22e-12	0.000652897	0.00144501	8.87e-12	9.05e-10	1.1e-10	2.17e-08	lincRNA	101928233
HSD17B8	ENSG00000232357	40.7129	80.1573	80.9774	1.55e-13	1.25e-12	1.34e-12	3.62e-11	9.65e-06	1.63e-05	0.847904	0.377188	protein_coding	7923
MTMR12	ENSG00000150712	1555.61	2133.1	3736.86	1.58e-13	1.27e-12	9.58e-07	4.92e-06	3.97e-10	5.38e-09	1.14e-07	9.9e-07	protein_coding	54545
MYO1A	ENSG00000166866	1.67619	125.805	131.96	1.59e-13	1.27e-12	4.07e-13	1.26e-11	5.07e-05	6.58e-05	0.616274	0.309602	protein_coding	4640
PGBD5	ENSG00000177614	392.166	142.693	2924	1.59e-13	1.28e-12	0.000294882	0.000728023	2e-11	9.73e-10	1.52e-10	2.17e-08	protein_coding	79605
MGP	ENSG00000111341	1300.72	5031.13	5409.26	1.61e-13	1.29e-12	6.05e-12	1.34e-10	1.46e-06	3.34e-06	0.780698	0.359245	protein_coding	4256
	ENSG00000258168	46.5867	-3.44927	1.20306	1.62e-13	1.29e-12	3.87e-13	1.21e-11	5.99e-05	7.6e-05	0.500076	0.270106	antisense
ABHD16A	ENSG00000230475	18.2913	86.0843	110.371	1.65e-13	1.31e-12	1.92e-11	3.71e-10	3.31e-07	9.78e-07	0.790212	0.361862	protein_coding	7920
RAD51	ENSG00000051180	175.917	319.72	357.39	1.65e-13	1.31e-12	1.28e-12	3.47e-11	1.09e-05	1.81e-05	0.867334	0.382398	protein_coding	5888
NUS1P2	ENSG00000234685	455.991	26.7618	1512.52	1.65e-13	1.31e-12	1.04e-07	7.09e-07	3.09e-08	1.4e-07	6.75e-09	1.15e-07	processed_pseudogene
GRAMD1A	ENSG00000089351	1472.25	2233.32	3404.46	1.69e-13	1.33e-12	9.21e-10	1.1e-08	3.09e-08	1.4e-07	0.000892608	0.00174066	protein_coding	57655
SLC6A8	ENSG00000130821	1213.79	2489.25	2932.01	1.7e-13	1.34e-12	5.76e-12	1.28e-10	1.95e-06	4.26e-06	0.319207	0.197358	protein_coding	6535
WFDC21P	ENSG00000261040	35.4648	110.951	134.758	1.7e-13	1.34e-12	4.54e-12	1.05e-10	2.53e-06	5.3e-06	0.396659	0.230291	processed_transcript
OTUB1	ENSG00000167770	1790.1	2365.28	3071.67	1.79e-13	1.41e-12	2.93e-09	3.05e-08	1.3e-08	7.11e-08	0.000340706	0.000761175	protein_coding	55611
MAL	ENSG00000172005	490.093	3580.26	3930.1	1.83e-13	1.43e-12	7.8e-13	2.21e-11	2.28e-05	3.36e-05	0.705877	0.338011	protein_coding	4118
HSD17B8	ENSG00000225312	40.7396	80.0065	80.7432	1.87e-13	1.46e-12	1.48e-12	3.91e-11	1.12e-05	1.85e-05	0.828566	0.372105	protein_coding	7923
GPN1	ENSG00000198522	1192.89	1700.68	2033.31	1.89e-13	1.48e-12	1.31e-10	2e-09	1.2e-07	4.17e-07	0.0203365	0.0233533	protein_coding	11321
S1PR5	ENSG00000180739	10.0826	48.5946	45.0572	1.9e-13	1.48e-12	1.22e-12	3.32e-11	2.03e-05	3.05e-05	0.227647	0.154661	protein_coding	53637
	ENSG00000253326	39.3388	27.7767	115.524	1.96e-13	1.52e-12	0.000628872	0.00140086	1.33e-11	9.05e-10	1.19e-10	2.17e-08	processed_pseudogene
STAC2	ENSG00000141750	31.1176	345.18	370.337	1.97e-13	1.53e-12	3.16e-12	7.61e-11	4.47e-06	8.56e-06	0.935896	0.400117	protein_coding	342667
LMF2	ENSG00000100258	782.343	955.799	2593.63	2.01e-13	1.55e-12	0.00165278	0.00316684	4.67e-12	9.05e-10	1.01e-10	2.17e-08	protein_coding	91289
CD9	ENSG00000010278	9646.21	18070.4	16995.8	2.03e-13	1.57e-12	3.78e-13	1.19e-11	9.54e-05	0.00011279	0.383017	0.224652	protein_coding	928
	ENSG00000279481	15.7744	85.0911	80.7652	2.05e-13	1.58e-12	9.51e-13	2.66e-11	2.88e-05	4.1e-05	0.343846	0.207997	TEC
LGALS9	ENSG00000168961	1158.5	2441.3	2372.65	2.13e-13	1.63e-12	2.46e-13	8.04e-12	0.000185013	0.00019871	0.356609	0.21357	protein_coding	3965
RPL8	ENSG00000161016	34813.4	65930.3	77406.4	2.13e-13	1.63e-12	7.15e-12	1.54e-10	1.77e-06	3.93e-06	0.780698	0.359245	protein_coding	6132
RPL8	ENSG00000161016	34813.4	65930.3	77406.4	2.13e-13	1.63e-12	7.15e-12	1.54e-10	1.77e-06	3.93e-06	0.780698	0.359245	protein_coding	102465978
LIME1	ENSG00000203896	228.732	619.323	480.485	2.2e-13	1.68e-12	2.34e-13	7.69e-12	0.000586057	0.000532324	0.030833	0.0327257	protein_coding	54923
INO80C	ENSG00000153391	185.04	305.721	364.116	2.21e-13	1.69e-12	2.02e-11	3.87e-10	6.78e-07	1.78e-06	0.218252	0.15005	protein_coding	125476
GLTSCR1	ENSG00000063169	258.65	311.589	613.713	2.27e-13	1.73e-12	0.000276066	0.000685978	2e-11	9.73e-10	3.13e-10	2.17e-08	protein_coding	29998
GABBR2	ENSG00000136928	19.7488	140.404	181.575	2.3e-13	1.74e-12	1.02e-11	2.08e-10	1.28e-06	2.99e-06	0.696704	0.33516	protein_coding	9568
VSIG8	ENSG00000243284	182.834	-34.3004	-139.554	2.4e-13	1.81e-12	3.19e-09	3.27e-08	1.75e-09	1.57e-08	0.103705	0.08496	protein_coding	391123
NOL7	ENSG00000225921	1014.37	1548.47	1598.09	2.4e-13	1.81e-12	6.24e-13	1.83e-11	4.53e-05	6e-05	0.906424	0.392828	protein_coding	51406
SBSN	ENSG00000189001	39.0109	-24.3355	20.3327	2.49e-13	1.88e-12	1.63e-13	5.66e-12	0.0158731	0.00906416	0.000200555	0.000485527	protein_coding	374897
LCNL1	ENSG00000214402	39.3065	178.141	157.135	2.71e-13	2.04e-12	5.23e-13	1.58e-11	0.000124705	0.00014163	0.183459	0.131649	protein_coding	401562
ACY1	ENSG00000243989	689.802	1130.82	1827.03	2.75e-13	2.07e-12	9.21e-09	8.36e-08	1.4e-08	7.49e-08	3.49e-05	0.000110932	protein_coding	95
GDNF	ENSG00000168621	210.084	-168.661	17.9318	2.8e-13	2.1e-12	3.33e-13	1.06e-11	0.00139274	0.00112465	0.00329518	0.00515003	protein_coding	2668
WBP2	ENSG00000132471	1746.32	2565.19	3780.94	2.81e-13	2.1e-12	4.34e-09	4.28e-08	1.76e-08	8.87e-08	0.000221129	0.000528021	protein_coding	23558
SMKR1	ENSG00000240204	73.7816	197.989	174.202	2.88e-13	2.14e-12	4.39e-13	1.35e-11	0.000146179	0.000162088	0.290075	0.183987	protein_coding	100287482
CYS1	ENSG00000205795	407.656	107.619	5181.39	2.88e-13	2.14e-12	0.00269976	0.00476742	4.89e-12	9.05e-10	1.01e-10	2.17e-08	protein_coding	192668
CRIP1	ENSG00000213145	2031.29	4938.49	3762.64	3.06e-13	2.27e-12	2.66e-14	1.17e-12	0.0102085	0.00621583	0.111828	0.0901952	protein_coding	1396
IFNAR1	ENSG00000142166	2147.07	3177.31	3808.88	3.07e-13	2.27e-12	1.4e-10	2.1e-09	1.38e-07	4.72e-07	0.0821203	0.070729	protein_coding	3454
HMOX1	ENSG00000100292	1504.33	138.674	608.832	3.08e-13	2.28e-12	2.4e-13	7.86e-12	0.00038655	0.000373148	0.252386	0.166274	protein_coding	3162
APCDD1L-AS1	ENSG00000231290	47.8856	-22.1973	10.3003	3.13e-13	2.31e-12	2.16e-13	7.2e-12	0.00474886	0.00323462	0.00170832	0.00298911	processed_transcript	149773
UBAP1	ENSG00000165006	1489.28	1741.17	3711.87	3.23e-13	2.38e-12	0.000730194	0.00158474	1.22e-11	9.05e-10	3.13e-10	2.17e-08	protein_coding	51271
BST2	ENSG00000130303	4139.92	12276	11335.9	3.25e-13	2.39e-12	4.07e-13	1.26e-11	0.000185013	0.00019871	0.331379	0.202772	protein_coding	684
TG	ENSG00000042832	902.754	-1391.64	-584.824	3.29e-13	2.41e-12	1.59e-13	5.55e-12	0.00108292	0.000904487	0.109067	0.0884838	protein_coding	7038
FAM50A	ENSG00000071859	838.794	1529.79	1623.14	3.29e-13	2.41e-12	4.87e-12	1.12e-10	5.56e-06	1.03e-05	0.607594	0.306939	protein_coding	9130
PMS2P1	ENSG00000078319	140.389	262.712	227.494	3.3e-13	2.41e-12	1.06e-13	3.86e-12	0.00237141	0.00178143	0.0698694	0.0624473	unprocessed_pseudogene
PLEKHA4	ENSG00000105559	513.799	1090.67	1147.41	3.32e-13	2.42e-12	2.67e-12	6.52e-11	1.19e-05	1.94e-05	0.945741	0.40245	protein_coding	57664
PSMD13	ENSG00000185627	2013.52	3031.94	3080.75	3.34e-13	2.42e-12	1e-12	2.78e-11	5.21e-05	6.74e-05	0.454091	0.252708	protein_coding	5719
SLC25A40	ENSG00000075303	504.977	771.558	875.874	3.34e-13	2.42e-12	6.09e-11	1.04e-09	3.67e-07	1.07e-06	0.129573	0.101033	protein_coding	55972
WFIKKN2	ENSG00000173714	11.1048	94.6813	137.724	3.37e-13	2.44e-12	1.39e-11	2.72e-10	1.56e-06	3.54e-06	0.590398	0.30179	protein_coding	124857
EIF5B	ENSG00000158417	2602.63	3373.49	4708.86	3.44e-13	2.48e-12	2.74e-08	2.19e-07	4.92e-09	3.4e-08	5.94e-05	0.000173913	protein_coding	9669
NTSR1	ENSG00000101188	-2.33237	104.701	96.6254	3.44e-13	2.48e-12	1.31e-12	3.54e-11	3.32e-05	4.62e-05	0.733647	0.345962	protein_coding	4923
NAPA	ENSG00000105402	1446.47	1818.01	2849.89	3.48e-13	2.51e-12	2.17e-06	1e-05	2.84e-10	4.24e-09	4.6e-07	3e-06	protein_coding	8775
GTF2IP13	ENSG00000272556	48.8561	38.2585	141.957	3.5e-13	2.51e-12	0.00129116	0.00256595	1.11e-11	9.05e-10	1.65e-10	2.17e-08	transcribed_unprocessed_pseudogene
UBA1	ENSG00000130985	8363.33	14869.1	17305.5	3.52e-13	2.52e-12	1.26e-11	2.5e-10	2.37e-06	5.02e-06	0.175441	0.127335	protein_coding	7317
SP2	ENSG00000167182	392.411	488.118	751.38	3.56e-13	2.54e-12	9.92e-07	5.08e-06	5.11e-10	6.42e-09	9.29e-07	5.45e-06	protein_coding	6668
ILK	ENSG00000166333	1795.2	2400.74	2880.15	3.57e-13	2.55e-12	8.82e-10	1.06e-08	3.87e-08	1.67e-07	0.0109965	0.0140255	protein_coding	3611
APOL1	ENSG00000100342	6050.23	1480.55	20773	3.6e-13	2.56e-12	4.36e-08	3.29e-07	2.88e-07	8.75e-07	9.74e-09	1.49e-07	protein_coding	8542
CACNG8	ENSG00000142408	54.4566	-33.303	6.41578	3.61e-13	2.57e-12	5.1e-13	1.55e-11	0.000448303	0.00042402	0.0255183	0.0281055	protein_coding	100126325
CACNG8	ENSG00000142408	54.4566	-33.303	6.41578	3.61e-13	2.57e-12	5.1e-13	1.55e-11	0.000448303	0.00042402	0.0255183	0.0281055	protein_coding	59283
MRPS18B	ENSG00000233813	150.432	287.671	272.199	3.75e-13	2.66e-12	1.86e-13	6.25e-12	0.000660899	0.000590826	0.307332	0.191911	protein_coding	28973
NSDHL	ENSG00000147383	457.501	854.273	1008.89	3.86e-13	2.73e-12	9.96e-12	2.04e-10	2.87e-06	5.9e-06	0.598968	0.304274	protein_coding	50814
DOCK5	ENSG00000147459	642.426	998.944	2177.82	3.9e-13	2.75e-12	2.17e-05	7.49e-05	6.31e-11	1.72e-09	6.62e-08	6.4e-07	protein_coding	80005
PAQR7	ENSG00000182749	685.582	432.503	3535.98	3.9e-13	2.75e-12	0.00392377	0.00649484	5.12e-12	9.05e-10	1.01e-10	2.17e-08	protein_coding	164091
SIDT2	ENSG00000149577	873.877	1120.66	2275.19	3.96e-13	2.79e-12	8.51e-05	0.000246557	4.86e-11	1.44e-09	4.01e-09	8.08e-08	protein_coding	51092
AHCY	ENSG00000101444	5647.72	8183.55	11453.9	3.97e-13	2.79e-12	2.98e-10	4.07e-09	1.83e-07	6e-07	0.00612919	0.0086564	protein_coding	191
RP2	ENSG00000102218	522.91	880.474	965.52	4e-13	2.8e-12	2.87e-12	6.95e-11	1.43e-05	2.27e-05	0.975322	0.40949	protein_coding	6102
IGLV1-47	ENSG00000211648	84.2906	1059.06	1385.65	4.07e-13	2.85e-12	1.39e-11	2.72e-10	1.89e-06	4.16e-06	0.985192	0.412009	IG_V_gene
TCTEX1D2	ENSG00000213123	143.846	311.044	314.535	4.1e-13	2.86e-12	2.8e-12	6.81e-11	1.6e-05	2.5e-05	0.742984	0.348697	protein_coding	255758
IL4R	ENSG00000077238	947.997	714.905	3108.31	4.17e-13	2.9e-12	0.00264001	0.00467995	8.48e-12	9.05e-10	1.1e-10	2.17e-08	protein_coding	3566
LYZ	ENSG00000090382	3383.96	11776.4	9370.95	4.3e-13	2.98e-12	6.72e-13	1.92e-11	0.00013504	0.000151763	0.396659	0.230291	protein_coding	4069
BCO1	ENSG00000135697	81.7316	32.8852	349.989	4.33e-13	3.01e-12	6.42e-06	2.55e-05	1.43e-09	1.34e-08	2.55e-09	5.93e-08	protein_coding	53630
HCST	ENSG00000126264	98.7523	202.888	194.443	4.38e-13	3.03e-12	3.33e-13	1.06e-11	0.00045945	0.000432985	0.209139	0.145392	protein_coding	10870
HSD17B8	ENSG00000204228	39.919	78.3695	79.3852	4.76e-13	3.28e-12	1.64e-12	4.24e-11	3.83e-05	5.21e-05	0.896626	0.390371	protein_coding	7923
HSD17B8	ENSG00000228712	39.919	78.3695	79.3852	4.76e-13	3.28e-12	1.64e-12	4.24e-11	3.83e-05	5.21e-05	0.896626	0.390371	protein_coding	7923
FERMT1	ENSG00000101311	-2.66567	1091.43	1034.86	4.78e-13	3.29e-12	7.86e-12	1.68e-10	5.06e-06	9.51e-06	0.92606	0.397618	protein_coding	55612
SNUPN	ENSG00000169371	519.231	763.063	977.68	4.9e-13	3.36e-12	1.53e-09	1.73e-08	5.01e-08	2.05e-07	0.00280567	0.00451208	protein_coding	10073
CCDC107	ENSG00000159884	270.029	384.032	490.848	4.93e-13	3.37e-12	7.12e-10	8.72e-09	7.76e-08	2.91e-07	0.0106132	0.0136134	protein_coding	203260
RIMKLB	ENSG00000166532	2361.9	1105.96	26104.7	4.95e-13	3.38e-12	0.0068562	0.0103724	3.71e-12	9.05e-10	1.1e-10	2.17e-08	protein_coding	57494
EIF1B	ENSG00000114784	721.01	998.494	1156.52	5.03e-13	3.42e-12	1.34e-10	2.03e-09	2.69e-07	8.28e-07	0.103705	0.08496	protein_coding	10289
ZNF208	ENSG00000160321	337.824	90.8939	56.9697	5.17e-13	3.51e-12	2.79e-11	5.22e-10	1.24e-06	2.91e-06	0.500076	0.270106	protein_coding	7757
TFDP1	ENSG00000198176	1743.56	2950.93	3375.8	5.17e-13	3.51e-12	1.31e-10	2e-09	2.26e-07	7.16e-07	0.218252	0.15005	protein_coding	7027
E2F3	ENSG00000112242	789.615	1636.87	1948.19	5.19e-13	3.51e-12	3.13e-11	5.82e-10	1.51e-06	3.44e-06	0.12343	0.0972914	protein_coding	1871
HDAC10	ENSG00000100429	304.639	484.385	644.886	5.26e-13	3.55e-12	3.68e-11	6.64e-10	1.66e-06	3.73e-06	0.0393764	0.0397793	protein_coding	83933
ARHGEF38	ENSG00000236699	57.4621	216.938	218.15	5.31e-13	3.58e-12	6.09e-11	1.04e-09	3.8e-07	1.1e-06	0.985192	0.412009	protein_coding	54848
HCCS	ENSG00000004961	434.003	630.261	834.939	5.31e-13	3.58e-12	1.78e-09	1.98e-08	5.19e-08	2.11e-07	0.00210587	0.00354802	protein_coding	3052
CAPN14	ENSG00000214711	48.4555	7.92837	250.897	5.35e-13	3.59e-12	0.000120799	0.00033379	4.7e-10	6e-09	1.29e-10	2.17e-08	protein_coding	440854
ALG12	ENSG00000182858	365.826	440.346	1115.16	5.41e-13	3.63e-12	0.00225445	0.00411166	9.72e-12	9.05e-10	1.94e-10	2.17e-08	protein_coding	79087
TFG	ENSG00000114354	2751.43	3242.42	5742.53	5.42e-13	3.63e-12	0.000175039	0.000462412	4.65e-11	1.4e-09	2.03e-09	5.15e-08	protein_coding	10342
SLC15A1	ENSG00000088386	96.0354	191.55	1557.71	5.71e-13	3.81e-12	0.00631442	0.00969921	4.89e-12	9.05e-10	1.1e-10	2.17e-08	protein_coding	6564
MYL9	ENSG00000101335	3062.55	7708.61	8762.57	5.88e-13	3.92e-12	5.24e-12	1.18e-10	1.16e-05	1.9e-05	0.935896	0.400117	protein_coding	10398
GOLPH3	ENSG00000113384	2780.35	3779.82	5045.06	5.99e-13	3.98e-12	8.67e-09	7.93e-08	1.83e-08	9.14e-08	0.000411324	0.000894356	protein_coding	64083
TOMM6	ENSG00000214736	1706.32	2456.62	2993.68	6.06e-13	4.03e-12	1.15e-10	1.8e-09	4.51e-07	1.27e-06	0.0821203	0.070729	protein_coding	100188893
TUBGCP6	ENSG00000128159	673.992	834.769	1936.03	6.09e-13	4.03e-12	0.00140267	0.00275963	1.53e-11	9.05e-10	2.89e-10	2.17e-08	protein_coding	85378
ACTL6A	ENSG00000136518	1489.9	2706.44	2359.19	6.11e-13	4.04e-12	1.33e-13	4.71e-12	0.00437553	0.00301232	0.0737746	0.0651396	protein_coding	86
CCL4L2	ENSG00000276070	31.5172	90.6454	-1.31077	6.27e-13	4.14e-12	2.04e-12	5.19e-11	0.0305068	0.0158364	1.96e-06	1.01e-05	protein_coding	9560
CCL4L2	ENSG00000276070	31.5172	90.6454	-1.31077	6.27e-13	4.14e-12	2.04e-12	5.19e-11	0.0305068	0.0158364	1.96e-06	1.01e-05	protein_coding	388372
CD55	ENSG00000196352	2468.6	6434.3	8777.49	6.4e-13	4.22e-12	1.68e-10	2.44e-09	3.43e-07	1.01e-06	0.0591604	0.0547784	protein_coding	1604
MATK	ENSG00000007264	42.7412	153.531	111.745	6.46e-13	4.25e-12	6.81e-14	2.62e-12	0.0196279	0.010856	0.0298862	0.0319219	protein_coding	4145
MRPL33	ENSG00000243147	1144.19	1727.82	2062.35	6.69e-13	4.39e-12	1.34e-10	2.03e-09	4.36e-07	1.23e-06	0.0778564	0.0679216	protein_coding	9553
DCK	ENSG00000156136	706.313	1227.66	1181.99	7.09e-13	4.65e-12	1.41e-12	3.75e-11	0.000109117	0.000126276	0.376305	0.222064	protein_coding	1633
TRDC	ENSG00000211829	314.557	-155.312	100.417	7.15e-13	4.67e-12	6.39e-13	1.86e-11	0.00604813	0.00396736	0.00059536	0.00122931	TR_C_gene
B4GALT1	ENSG00000086062	6041.82	4160.01	20049.7	7.32e-13	4.78e-12	0.00109228	0.00222969	3.9e-11	1.32e-09	1.94e-10	2.17e-08	protein_coding	2683
CAMKMT	ENSG00000143919	119.028	203.823	240.813	7.46e-13	4.86e-12	2.34e-10	3.29e-09	2.26e-07	7.16e-07	0.12343	0.0972914	protein_coding	79823
LINC01001	ENSG00000230724	439.305	321.367	1087.18	7.59e-13	4.94e-12	0.000205875	0.000532039	1.38e-10	2.67e-09	5.9e-10	2.55e-08	lincRNA
HM13	ENSG00000101294	3663.6	5880.9	12385.5	7.86e-13	5.1e-12	1.02e-05	3.85e-05	1.16e-10	2.44e-09	1.05e-06	6.04e-06	protein_coding	81502
RELA	ENSG00000173039	1842.88	2304.91	3203.31	8.21e-13	5.32e-12	7e-07	3.73e-06	1.12e-09	1.12e-08	5.76e-06	2.47e-05	protein_coding	5970
NRDC	ENSG00000078618	2732.82	4026.63	4406.81	8.3e-13	5.37e-12	1.17e-10	1.83e-09	5.17e-07	1.42e-06	0.209139	0.145392	protein_coding	4898
NRDC	ENSG00000078618	2732.82	4026.63	4406.81	8.3e-13	5.37e-12	1.17e-10	1.83e-09	5.17e-07	1.42e-06	0.209139	0.145392	protein_coding	100313892
PCP4	ENSG00000183036	94.4792	555.974	539.283	8.46e-13	5.46e-12	3.65e-12	8.67e-11	3.23e-05	4.52e-05	0.847904	0.377188	protein_coding	5121
PLSCR1	ENSG00000188313	1918.2	3701	4119.95	8.57e-13	5.52e-12	1.42e-11	2.78e-10	5.56e-06	1.03e-05	0.975322	0.40949	protein_coding	5359
SLC39A4	ENSG00000147804	699.925	1148.18	2358.62	9.04e-13	5.8e-12	2.53e-06	1.14e-05	8.05e-10	8.97e-09	5.23e-07	3.33e-06	protein_coding	55630
BCL9L	ENSG00000186174	1865.11	2855.41	4230.02	9.2e-13	5.9e-12	4.04e-08	3.07e-07	1.2e-08	6.69e-08	5.63e-05	0.000166326	protein_coding	283149
ST3GAL3	ENSG00000126091	193.867	263.399	462.331	9.33e-13	5.97e-12	9.41e-06	3.59e-05	2.11e-10	3.58e-09	5.23e-07	3.33e-06	protein_coding	6487
NLGN2	ENSG00000169992	619.056	836.077	1766.07	9.38e-13	5.99e-12	4.45e-05	0.000140702	1.26e-10	2.55e-09	3.3e-08	3.76e-07	protein_coding	57555
MATN3	ENSG00000132031	312.378	-42.977	243.508	9.41e-13	5.99e-12	2.11e-13	7.05e-12	0.127781	0.0535176	0.000243671	0.000571828	protein_coding	4148
TMEM100	ENSG00000166292	276.457	996.329	1065.56	9.45e-13	6.01e-12	4.99e-12	1.14e-10	2.49e-05	3.62e-05	0.945741	0.40245	protein_coding	55273
ADIRF	ENSG00000148671	493.137	1850.01	2162.44	9.49e-13	6.03e-12	4.99e-12	1.14e-10	2.88e-05	4.1e-05	0.484478	0.264145	protein_coding	10974
HACD2	ENSG00000206527	1845.66	2974.7	3528.16	9.68e-13	6.14e-12	3.55e-10	4.77e-09	2.6e-07	8.07e-07	0.0528072	0.0501641	protein_coding	201562
FAM65A	ENSG00000039523	760.895	1013.11	1493.7	9.72e-13	6.14e-12	2.77e-07	1.66e-06	2.32e-09	1.91e-08	2.13e-05	7.35e-05	protein_coding	79567
SSTR1	ENSG00000139874	128.252	27.9923	849.358	1e-12	6.33e-12	4.58e-05	0.000144268	6.55e-10	7.67e-09	1.62e-09	4.54e-08	protein_coding	6751
GNE	ENSG00000159921	1308.68	319.156	4311.34	1.01e-12	6.34e-12	4.11e-07	2.36e-06	1.24e-07	4.29e-07	5.4e-09	9.84e-08	protein_coding	10020
GINM1	ENSG00000055211	1147.12	1429.83	2221.63	1.01e-12	6.36e-12	1.1e-05	4.11e-05	4.32e-10	5.74e-09	7.09e-08	6.73e-07	protein_coding	116254
NCF1	ENSG00000158517	133.531	315.634	68.1699	1.04e-12	6.53e-12	1.41e-12	3.75e-11	0.048393	0.0235145	7.27e-06	3e-05	protein_coding	653361
UCHL3	ENSG00000118939	348.679	584.121	599.697	1.04e-12	6.53e-12	2.67e-12	6.52e-11	6.51e-05	8.15e-05	0.857608	0.3797	protein_coding	7347
HNRNPA2B1	ENSG00000122566	13177.1	17171.3	21860.5	1.05e-12	6.56e-12	6.27e-09	5.95e-08	2.47e-08	1.16e-07	0.00417633	0.00627828	protein_coding	3181
KLK6	ENSG00000167755	1335.8	4354.69	4272.18	1.07e-12	6.67e-12	4.02e-12	9.43e-11	5.36e-05	6.9e-05	0.284471	0.181251	protein_coding	5653
RSPO3	ENSG00000146374	161.026	849.079	1010.93	1.08e-12	6.7e-12	1.49e-11	2.9e-10	7.33e-06	1.3e-05	0.995064	0.41464	protein_coding	84870
LMBRD1	ENSG00000168216	1292.39	1782.83	2370.72	1.08e-12	6.7e-12	1.78e-08	1.51e-07	1.4e-08	7.49e-08	0.000853824	0.00167988	protein_coding	55788
MT1F	ENSG00000198417	418.216	1115.56	1670.33	1.08e-12	6.73e-12	1.4e-10	2.1e-09	1.01e-06	2.46e-06	0.032804	0.0343883	protein_coding	4494
PAPD7	ENSG00000112941	603.477	814.531	1184.56	1.09e-12	6.74e-12	3.97e-07	2.29e-06	2.83e-09	2.22e-08	6.48e-06	2.73e-05	protein_coding	11044
GNPTG	ENSG00000090581	1017.27	1255.72	2108.91	1.11e-12	6.89e-12	0.000254973	0.000640341	2.29e-11	1.03e-09	4.37e-08	4.66e-07	protein_coding	84572
BICC1	ENSG00000122870	716.857	425.96	3947.92	1.16e-12	7.17e-12	0.000867491	0.00182945	7.52e-11	1.89e-09	3.13e-10	2.17e-08	protein_coding	80114
NOS1	ENSG00000089250	176.886	174.461	2025.59	1.16e-12	7.17e-12	0.00117376	0.00236689	5.88e-12	9.05e-10	5.4e-09	9.84e-08	protein_coding	4842
SHANK3	ENSG00000251322	341.523	376.198	1170.97	1.17e-12	7.21e-12	0.0122021	0.0166834	7.06e-12	9.05e-10	1.01e-10	2.17e-08	protein_coding	85358
VAT1	ENSG00000108828	2877.77	3533.1	9130.94	1.19e-12	7.3e-12	0.00298424	0.00517291	1.6e-11	9.05e-10	3.67e-10	2.17e-08	protein_coding	10493
KHSRP	ENSG00000088247	2845.41	4044.12	4533.96	1.19e-12	7.3e-12	2.56e-10	3.55e-09	3.8e-07	1.1e-06	0.135951	0.104789	protein_coding	8570
KHSRP	ENSG00000088247	2845.41	4044.12	4533.96	1.19e-12	7.3e-12	2.56e-10	3.55e-09	3.8e-07	1.1e-06	0.135951	0.104789	protein_coding	100500888
WDSUB1	ENSG00000196151	310.994	446.899	624.764	1.23e-12	7.53e-12	3.96e-08	3.02e-07	7.28e-09	4.6e-08	0.000713796	0.00144079	protein_coding	151525
ANKRD36BP2	ENSG00000230006	217.692	98.3089	19.3222	1.23e-12	7.53e-12	4.89e-08	3.64e-07	9.54e-09	5.58e-08	0.00018179	0.000446043	transcribed_unprocessed_pseudogene	645784
DKC1	ENSG00000130826	1744.51	2752.06	2777.1	1.26e-12	7.67e-12	2.48e-12	6.11e-11	0.000106229	0.0001233	0.573431	0.296371	protein_coding	100847052
DKC1	ENSG00000130826	1744.51	2752.06	2777.1	1.26e-12	7.67e-12	2.48e-12	6.11e-11	0.000106229	0.0001233	0.573431	0.296371	protein_coding	1736
CHIT1	ENSG00000133063	-58.473	923.107	835.616	1.27e-12	7.7e-12	8.85e-12	1.86e-10	1.81e-05	2.76e-05	0.906424	0.392828	protein_coding	1118
MRPS18B	ENSG00000203624	156.813	242.348	291.596	1.27e-12	7.71e-12	4.32e-11	7.63e-10	3.06e-06	6.23e-06	0.232451	0.15689	protein_coding	28973
CTSA	ENSG00000064601	3037.11	3672.9	10866.8	1.3e-12	7.89e-12	0.00782611	0.0115473	1.11e-11	9.05e-10	1.29e-10	2.17e-08	protein_coding	5476
NFIL3	ENSG00000165030	774.805	984.808	2381.59	1.38e-12	8.37e-12	0.000561639	0.00127171	6.6e-11	1.74e-09	1.02e-09	3.44e-08	protein_coding	4783
	ENSG00000235142	60.3881	5.33351	1323.81	1.39e-12	8.39e-12	0.0308569	0.0352918	3.71e-12	9.05e-10	1.01e-10	2.17e-08	lincRNA	100422737
BLOC1S3	ENSG00000189114	226.223	339.742	569.055	1.4e-12	8.42e-12	1.21e-07	8.05e-07	9.54e-09	5.58e-08	1.81e-05	6.4e-05	protein_coding	388552
SYNE2	ENSG00000054654	5292.49	6565.07	25659.7	1.4e-12	8.44e-12	0.0278228	0.0324308	3.54e-12	9.05e-10	1.4e-10	2.17e-08	protein_coding	23224
ATP5J	ENSG00000154723	1819.47	2652.76	3196.51	1.41e-12	8.45e-12	1.28e-10	1.97e-09	1.05e-06	2.53e-06	0.163908	0.120973	protein_coding	522
AIF1	ENSG00000235985	58.8948	125.732	85.9035	1.41e-12	8.45e-12	1.76e-13	6.02e-12	0.0434193	0.0214609	0.00660677	0.00924214	protein_coding	199
FAU	ENSG00000149806	7143.91	10422.6	10780.5	1.43e-12	8.55e-12	2.19e-12	5.5e-11	0.000138661	0.000155049	0.724349	0.343255	protein_coding	2197
SFRP2	ENSG00000145423	1049.64	5710.52	3589.24	1.43e-12	8.55e-12	9.75e-13	2.72e-11	0.00242337	0.00181544	0.0118003	0.0148624	protein_coding	6423
CTH	ENSG00000116761	188.015	132.217	945.682	1.44e-12	8.61e-12	0.00664832	0.010112	7.74e-12	9.05e-10	4.3e-10	2.24e-08	protein_coding	1491
IDH3G	ENSG00000067829	761.823	1191.87	1266.11	1.46e-12	8.68e-12	1.26e-11	2.5e-10	1.47e-05	2.32e-05	0.424808	0.2414	protein_coding	3421
DENND3	ENSG00000105339	525.134	411.1	1801.3	1.5e-12	8.94e-12	0.0198498	0.0248218	6.75e-12	9.05e-10	1.01e-10	2.17e-08	protein_coding	22898
CTNNBL1	ENSG00000132792	854.245	1277.19	1420.35	1.52e-12	9.03e-12	1.84e-11	3.55e-10	9.36e-06	1.59e-05	0.809332	0.366774	protein_coding	56259
NELL1	ENSG00000165973	32.6987	253.859	200.733	1.53e-12	9.05e-12	2.42e-12	6.01e-11	0.000171102	0.000185885	0.369667	0.219306	protein_coding	4745
ARHGEF1	ENSG00000076928	1082.86	1706.15	1597.16	1.53e-12	9.05e-12	1.72e-12	4.43e-11	0.000324575	0.000321034	0.232451	0.15689	protein_coding	100505585
ARHGEF1	ENSG00000076928	1082.86	1706.15	1597.16	1.53e-12	9.05e-12	1.72e-12	4.43e-11	0.000324575	0.000321034	0.232451	0.15689	protein_coding	9138
CDKN2A	ENSG00000147889	863.343	2588.88	2254.43	1.58e-12	9.32e-12	2.19e-12	5.5e-11	0.000216084	0.000226686	0.319207	0.197358	protein_coding	1029
HTATIP2	ENSG00000109854	561.669	1000.79	1183.71	1.62e-12	9.52e-12	5.19e-11	8.95e-10	2.87e-06	5.9e-06	0.556698	0.290739	protein_coding	10553
GNL1	ENSG00000206412	99.5333	-16.0702	-73.8677	1.63e-12	9.58e-12	1.12e-10	1.76e-09	1.83e-06	4.05e-06	0.0757931	0.0664909	protein_coding	2794
BAK1	ENSG00000030110	1040.88	1325.22	2502.27	1.64e-12	9.61e-12	2.45e-05	8.37e-05	3.97e-10	5.38e-09	5.38e-08	5.48e-07	protein_coding	578
ANXA7	ENSG00000138279	2486.68	3177.12	4358.74	1.65e-12	9.66e-12	2.23e-07	1.37e-06	3.59e-09	2.66e-08	8.11e-05	0.000226056	protein_coding	310
	ENSG00000261207	3.19609	2.24713	12.6314	1.65e-12	9.68e-12	0.0136867	0.0183584	1.11e-11	9.05e-10	1.1e-10	2.17e-08	antisense
C14orf105	ENSG00000100557	78.9176	48.059	442.333	1.68e-12	9.83e-12	0.00025838	0.000647714	3.26e-11	1.19e-09	1.3e-08	1.84e-07	protein_coding	55195
SULT2B1	ENSG00000088002	125.891	-2.16835	62.6427	1.72e-12	1e-11	1.45e-12	3.83e-11	0.001559	0.00124025	0.0160975	0.0191895	protein_coding	6820
	ENSG00000276980	38.5304	129.313	107.907	1.76e-12	1.02e-11	1.52e-12	3.98e-11	0.00208045	0.00159009	0.00795032	0.0107578	sense_intronic
TPO	ENSG00000115705	159.447	-241.805	-81.6101	1.76e-12	1.03e-11	7.24e-13	2.06e-11	0.00264183	0.00195235	0.0513112	0.0490144	protein_coding	7173
	ENSG00000279312	63.7027	41.1924	780.127	1.83e-12	1.06e-11	0.0482646	0.049983	3.54e-12	9.05e-10	1.01e-10	2.17e-08	TEC
TBC1D22A	ENSG00000054611	532.489	730.146	1066.95	1.86e-12	1.08e-11	1.26e-07	8.31e-07	7.56e-09	4.73e-08	8.99e-05	0.000246623	protein_coding	25771
GUCY2C	ENSG00000070019	172.148	-218.795	-199.718	1.87e-12	1.08e-11	4.23e-11	7.49e-10	4.2e-06	8.14e-06	0.857608	0.3797	protein_coding	2984
TRHDE-AS1	ENSG00000236333	37.383	152.956	243.275	1.88e-12	1.08e-11	6.19e-12	1.36e-10	4.79e-05	6.28e-05	0.507974	0.273098	processed_transcript
	ENSG00000275993	1185.16	2268.35	4475.89	1.93e-12	1.11e-11	2.81e-09	2.94e-08	1.77e-07	5.84e-07	0.00193764	0.00331094	protein_coding	102724428
MZT1	ENSG00000204899	609.441	1062.82	1006.05	1.96e-12	1.13e-11	8.83e-13	2.48e-11	0.000942119	0.000803479	0.356609	0.21357	protein_coding	440145
MPND	ENSG00000008382	302.336	491.387	602.952	1.97e-12	1.13e-11	4.33e-10	5.65e-09	5.17e-07	1.42e-06	0.0643312	0.0585767	protein_coding	84954
NT5DC2	ENSG00000168268	1091.34	1969.29	1902.07	2.04e-12	1.17e-11	5.24e-12	1.18e-10	7.89e-05	9.57e-05	0.660467	0.323849	protein_coding	64943
NOP16	ENSG00000048162	466.022	752.009	894.361	2.04e-12	1.17e-11	7.65e-11	1.25e-09	2.96e-06	6.08e-06	0.247294	0.163887	protein_coding	51491
	ENSG00000259342	129.089	-13.9016	67.1317	2.06e-12	1.17e-11	1.38e-12	3.68e-11	0.00232046	0.00174822	0.0155602	0.0186643	antisense
DECR1	ENSG00000104325	951.077	1482.11	1925.02	2.07e-12	1.18e-11	1.81e-09	2.02e-08	1.28e-07	4.43e-07	0.0318054	0.0335502	protein_coding	1666
USP4	ENSG00000114316	1198.18	1796.57	2100.84	2.07e-12	1.18e-11	2.56e-10	3.55e-09	9.48e-07	2.32e-06	0.0843222	0.072256	protein_coding	7375
LATS2	ENSG00000150457	552.388	673.6	1422.3	2.09e-12	1.19e-11	0.000547637	0.00124381	1.16e-10	2.44e-09	1.02e-09	3.44e-08	protein_coding	26524
ABCC5	ENSG00000114770	1134.16	936.288	3282.57	2.12e-12	1.2e-11	0.0102423	0.0144158	1.53e-11	9.05e-10	1.94e-10	2.17e-08	protein_coding	10057
NEIL1	ENSG00000140398	211.381	319.416	534.521	2.13e-12	1.21e-11	8.98e-06	3.44e-05	1.86e-10	3.32e-09	1.15e-05	4.4e-05	protein_coding	79661
MBIP	ENSG00000151332	506.767	745.225	1083.27	2.15e-12	1.21e-11	2.07e-07	1.29e-06	5.32e-09	3.65e-08	8.99e-05	0.000246623	protein_coding	51562
PRAF2	ENSG00000243279	454.121	669.716	1096.58	2.19e-12	1.23e-11	2.98e-07	1.77e-06	5.54e-09	3.74e-08	2.96e-05	9.66e-05	protein_coding	11230
LDLRAD1	ENSG00000203985	313.042	6.70381	-24.3287	2.24e-12	1.26e-11	1.79e-10	2.6e-09	7.02e-07	1.83e-06	0.195991	0.138539	protein_coding	388633
RPS5	ENSG00000083845	14095.2	21706.7	25358.2	2.25e-12	1.27e-11	4.42e-11	7.79e-10	6.1e-06	1.11e-05	0.356609	0.21357	protein_coding	6193
PON3	ENSG00000105852	37.0614	161.347	200.446	2.26e-12	1.27e-11	6.83e-11	1.14e-09	2.96e-06	6.08e-06	0.995064	0.41464	protein_coding	5446
NPM3	ENSG00000107833	490.164	881.517	856.921	2.28e-12	1.28e-11	4.99e-12	1.14e-10	0.000106229	0.0001233	0.515936	0.275826	protein_coding	10360
ARRB2	ENSG00000141480	612.802	1034.61	818.128	2.32e-12	1.3e-11	3.87e-13	1.21e-11	0.0241363	0.0129694	0.0102418	0.0132194	protein_coding	409
MDH2	ENSG00000146701	3757.13	6307.44	6030.87	2.33e-12	1.3e-11	2.67e-12	6.52e-11	0.00029347	0.000295334	0.337575	0.205303	protein_coding	4191
CDA	ENSG00000158825	82.1609	33.0807	416.542	2.33e-12	1.3e-11	0.00070353	0.00153901	3.09e-10	4.53e-09	2.89e-10	2.17e-08	protein_coding	978
SNRNP70	ENSG00000104852	2829.35	3453.35	6099.45	2.37e-12	1.32e-11	0.000306741	0.000753826	8.94e-11	2.07e-09	1.21e-08	1.76e-07	protein_coding	6625
LINC01535	ENSG00000226686	12.2863	117.193	116.348	2.39e-12	1.33e-11	9.73e-12	2.01e-10	4.41e-05	5.86e-05	0.678493	0.32922	lincRNA	101927667
F8A1	ENSG00000277203	573.637	912.587	1181.32	2.47e-12	1.37e-11	8.82e-10	1.06e-08	4.36e-07	1.23e-06	0.0203365	0.0233533	protein_coding	8263
FAM133A	ENSG00000179083	13.3506	129.955	174.055	2.51e-12	1.39e-11	2.66e-11	5.01e-10	1.23e-05	1.99e-05	0.607594	0.306939	protein_coding	286499
APOBR	ENSG00000184730	258.112	88.5319	177.61	2.54e-12	1.41e-11	6.89e-13	1.97e-11	0.00946377	0.00582277	0.0155602	0.0186643	protein_coding	55911
SRRM2	ENSG00000167978	9688.61	7807.25	17313.1	2.58e-12	1.42e-11	0.000265323	0.000662873	1.07e-09	1.08e-08	3.39e-10	2.17e-08	protein_coding	23524
LTB	ENSG00000204487	15.1577	55.6844	37.6237	2.61e-12	1.43e-11	6.55e-13	1.88e-11	0.00592875	0.00390384	0.0470345	0.0458413	protein_coding	4050
LTB	ENSG00000206437	15.1577	55.6844	37.6237	2.61e-12	1.43e-11	6.55e-13	1.88e-11	0.00592875	0.00390384	0.0470345	0.0458413	protein_coding	4050
LTB	ENSG00000236237	15.1577	55.6844	37.6237	2.61e-12	1.43e-11	6.55e-13	1.88e-11	0.00592875	0.00390384	0.0470345	0.0458413	protein_coding	4050
LTB	ENSG00000236925	15.1577	55.6844	37.6237	2.61e-12	1.43e-11	6.55e-13	1.88e-11	0.00592875	0.00390384	0.0470345	0.0458413	protein_coding	4050
LTB	ENSG00000238114	15.1577	55.6844	37.6237	2.61e-12	1.43e-11	6.55e-13	1.88e-11	0.00592875	0.00390384	0.0470345	0.0458413	protein_coding	4050
SRSF5	ENSG00000100650	3070.61	4028.63	6025.49	2.61e-12	1.43e-11	1.24e-06	6.16e-06	2.51e-09	2.02e-08	7.71e-06	3.13e-05	protein_coding	6430
COL4A4	ENSG00000081052	272.306	82.9497	1312.74	2.69e-12	1.47e-11	8.39e-05	0.000243603	1.82e-09	1.61e-08	1.28e-09	3.97e-08	protein_coding	1286
STUM	ENSG00000203685	200.615	93.7572	1039.94	2.71e-12	1.47e-11	0.000922071	0.00192849	6.31e-11	1.72e-09	2.19e-09	5.45e-08	protein_coding	375057
	ENSG00000277749	32.005	-1.82237	-3.775	2.72e-12	1.48e-11	1.19e-09	1.38e-08	6.01e-08	2.38e-07	0.581886	0.299139	antisense
TNFRSF18	ENSG00000186891	236.492	-87.3431	112.173	2.75e-12	1.49e-11	5.37e-13	1.61e-11	0.0295164	0.0154045	0.00506834	0.0074042	protein_coding	8784
	ENSG00000232445	30.6109	82.3302	87.4441	2.76e-12	1.5e-11	2.06e-11	3.95e-10	1.91e-05	2.9e-05	0.799757	0.364306	antisense
ATP6V0A1	ENSG00000033627	936.267	1052.98	2396.65	2.79e-12	1.51e-11	0.0223183	0.027319	8.87e-12	9.05e-10	2.27e-10	2.17e-08	protein_coding	100847046
DHDH	ENSG00000104808	12.4316	45.227	44.6659	2.82e-12	1.52e-11	9.73e-12	2.01e-10	5.83e-05	7.42e-05	0.598968	0.304274	protein_coding	27294
HSPB2	ENSG00000170276	45.2761	105.939	132.188	2.83e-12	1.52e-11	1.31e-10	2e-09	2.29e-06	4.89e-06	0.313233	0.194534	protein_coding	3316
PCBP1	ENSG00000169564	6585.65	8388	11336.9	2.85e-12	1.54e-11	1.45e-06	7.07e-06	8.39e-10	9.21e-09	0.000104811	0.000280897	protein_coding	5093
MUC6	ENSG00000277518	379.858	9.48557	47.1521	2.87e-12	1.54e-11	2e-10	2.87e-09	9.17e-07	2.26e-06	0.129573	0.101033	polymorphic_pseudogene	4588
FAM3D	ENSG00000198643	73.8647	-43.2732	-36.3022	2.87e-12	1.54e-11	2.92e-10	4e-09	5e-07	1.38e-06	0.273482	0.176017	protein_coding	131177
RNF167	ENSG00000108523	1644.88	2221.82	2752.05	2.88e-12	1.54e-11	3.88e-10	5.13e-09	9.8e-07	2.4e-06	0.0661355	0.0598141	protein_coding	26001
SAMD4B	ENSG00000179134	2030.38	3849.29	5019.58	2.92e-12	1.56e-11	1.4e-10	2.1e-09	3.47e-06	6.95e-06	0.0470345	0.0458413	protein_coding	55095
POLDIP2	ENSG00000004142	1842.34	2777.81	3082.9	2.93e-12	1.56e-11	4.13e-11	7.34e-10	9.08e-06	1.55e-05	0.515936	0.275826	protein_coding	26073
MIGA1	ENSG00000180488	818.192	939.872	2215.79	2.93e-12	1.57e-11	0.0142158	0.0189624	1.22e-11	9.05e-10	3.39e-10	2.17e-08	protein_coding	374986
KPTN	ENSG00000118162	96.9416	182.488	197.071	2.94e-12	1.57e-11	6.34e-12	1.39e-10	0.000103413	0.00012089	0.705877	0.338011	protein_coding	11133
PTHLH	ENSG00000087494	576.982	32.6459	2774.97	3.02e-12	1.61e-11	2.62e-07	1.59e-06	5.73e-07	1.54e-06	1.74e-08	2.28e-07	protein_coding	5744
CNTD1	ENSG00000176563	45.3733	6.81301	40.7665	3.05e-12	1.62e-11	5.5e-13	1.64e-11	0.513363	0.168089	0.000110272	0.000292822	protein_coding	124817
SLC6A14	ENSG00000268104	404.115	-187.713	91.643	3.06e-12	1.62e-11	3.36e-11	6.15e-10	3.23e-05	4.52e-05	0.00953356	0.0124738	protein_coding	11254
ERGIC3	ENSG00000125991	5326.62	8749.54	8816.95	3.09e-12	1.63e-11	8.24e-12	1.74e-10	7.89e-05	9.57e-05	0.715092	0.340646	protein_coding	51614
	ENSG00000243679	92.2354	62.6593	203.391	3.09e-12	1.63e-11	8.88e-05	0.000256241	1.68e-09	1.52e-08	1.75e-09	4.74e-08	processed_pseudogene
TNNC1	ENSG00000114854	905.074	-927.296	-72.8758	3.13e-12	1.65e-11	2.87e-12	6.95e-11	0.00149042	0.00119194	0.0166511	0.0197276	protein_coding	7134
TMCC3	ENSG00000057704	685.863	1091.27	2518.2	3.16e-12	1.66e-11	1.47e-06	7.18e-06	7e-09	4.46e-08	5.23e-07	3.33e-06	protein_coding	57458
TMCC3	ENSG00000057704	685.863	1091.27	2518.2	3.16e-12	1.66e-11	1.47e-06	7.18e-06	7e-09	4.46e-08	5.23e-07	3.33e-06	protein_coding	102465834
KDSR	ENSG00000119537	1155.16	1556.41	2065.66	3.17e-12	1.67e-11	8.98e-08	6.18e-07	1.35e-08	7.28e-08	0.000357212	0.000793267	protein_coding	2531
RAB11FIP5	ENSG00000135631	735.529	589.734	1931.12	3.18e-12	1.67e-11	0.0231297	0.0281296	1.53e-11	9.05e-10	1.29e-10	2.17e-08	protein_coding	26056
TMBIM1	ENSG00000135926	4031.52	5413.7	10828.1	3.25e-12	1.7e-11	0.000152716	0.000411118	1.26e-10	2.55e-09	8.14e-08	7.47e-07	protein_coding	102465256
TMBIM1	ENSG00000135926	4031.52	5413.7	10828.1	3.25e-12	1.7e-11	0.000152716	0.000411118	1.26e-10	2.55e-09	8.14e-08	7.47e-07	protein_coding	64114
MRPL13	ENSG00000172172	1043.12	1897.69	1986.8	3.25e-12	1.7e-11	9.5e-12	1.98e-10	6.88e-05	8.53e-05	0.809332	0.366774	protein_coding	28998
HOXA10	ENSG00000253293	361.078	-66.513	126.86	3.3e-12	1.72e-11	7.86e-12	1.68e-10	0.000519167	0.000479895	0.00547098	0.00789037	protein_coding	3206
TMC7	ENSG00000170537	40.2533	111.695	148.299	3.32e-12	1.72e-11	2.56e-10	3.55e-09	1.71e-06	3.82e-06	0.103705	0.08496	protein_coding	79905
HNRNPH3	ENSG00000096746	2640.28	3409.91	4406.67	3.32e-12	1.72e-11	1.6e-07	1.03e-06	3.73e-09	2.73e-08	0.00202015	0.0034279	protein_coding	3189
ZCCHC9	ENSG00000131732	411.957	468.526	861.618	3.32e-12	1.72e-11	0.0111841	0.0155345	1.06e-11	9.05e-10	1.1e-09	3.59e-08	protein_coding	84240
PTGDS	ENSG00000107317	2075.08	6192.69	6467.32	3.38e-12	1.75e-11	1.07e-11	2.17e-10	6.69e-05	8.34e-05	0.616274	0.309602	protein_coding	5730
CRELD2	ENSG00000184164	458.315	636.7	1190.13	3.39e-12	1.75e-11	0.000111121	0.000310979	8.94e-11	2.07e-09	4.6e-07	3e-06	protein_coding	79174
PNKP	ENSG00000039650	491.641	610.541	915.589	3.4e-12	1.76e-11	3.57e-05	0.000116545	4.51e-10	5.88e-09	1.71e-07	1.37e-06	protein_coding	11284
CBR1	ENSG00000159228	1071.93	1423.78	2673.33	3.4e-12	1.76e-11	4.19e-05	0.000133866	7.41e-10	8.46e-09	3.07e-08	3.59e-07	protein_coding	873
CLCN7	ENSG00000103249	1509.49	1850.24	3467.09	3.43e-12	1.77e-11	0.000628872	0.00140086	6.6e-11	1.74e-09	1.4e-08	1.94e-07	protein_coding	1186
TPPP3	ENSG00000159713	1475.34	-526.224	527.53	3.45e-12	1.77e-11	9.5e-12	1.98e-10	0.000676896	0.000603308	0.0015696	0.00279549	protein_coding	51673
RPL4P2	ENSG00000232341	35.579	47.3722	12.7648	3.47e-12	1.78e-11	8.88e-05	0.000256241	7.56e-09	4.73e-08	2.89e-10	2.17e-08	processed_pseudogene
POLR2E	ENSG00000099817	1717.12	1960.07	3823.16	3.48e-12	1.78e-11	0.00563239	0.0088077	2.39e-11	1.06e-09	9.43e-10	3.32e-08	protein_coding	5434
VCAN	ENSG00000038427	7207.34	4306.95	40730.4	3.48e-12	1.78e-11	0.0368517	0.0405473	1.06e-11	9.05e-10	1.29e-10	2.17e-08	protein_coding	1462
INHA	ENSG00000123999	144.77	0.640248	-145.476	3.54e-12	1.81e-11	1.09e-09	1.28e-08	7.02e-07	1.83e-06	0.00919608	0.0120989	protein_coding	3623
CDK16	ENSG00000102225	2699.01	4634	6013.19	3.56e-12	1.82e-11	3.96e-10	5.23e-09	1.46e-06	3.34e-06	0.0405739	0.0407624	protein_coding	5127
ANKRD11	ENSG00000167522	2579.46	1944.66	4558.16	3.57e-12	1.82e-11	3.57e-05	0.000116545	1.35e-08	7.28e-08	6.9e-10	2.77e-08	protein_coding	29123
FENDRR	ENSG00000268388	58.7178	-38.41	20.8773	3.57e-12	1.82e-11	5.5e-13	1.64e-11	0.119805	0.0506268	0.00106465	0.00202625	lincRNA	400550
TDRD9	ENSG00000156414	56.3865	309.161	244.063	3.62e-12	1.84e-11	2.48e-12	6.11e-11	0.000558392	0.000510771	0.446665	0.249957	protein_coding	122402
AIF1	ENSG00000206428	59.1405	118.635	93.903	3.72e-12	1.89e-11	1.52e-12	3.98e-11	0.00378566	0.00265761	0.032804	0.0343883	protein_coding	199
DAPK1	ENSG00000196730	1546.33	1239.35	8433.22	3.75e-12	1.9e-11	0.131423	0.108174	3.88e-12	9.05e-10	1.01e-10	2.17e-08	protein_coding	1612
ASNA1	ENSG00000198356	1530.73	2354.7	2705.78	3.76e-12	1.9e-11	7.48e-11	1.23e-09	6.1e-06	1.11e-05	0.581886	0.299139	protein_coding	439
	ENSG00000254615	124.528	339.621	373.348	3.8e-12	1.92e-11	3.52e-11	6.38e-10	1.56e-05	2.44e-05	0.886844	0.387734	lincRNA
	ENSG00000274092	7.65764	5.59912	39.426	3.83e-12	1.93e-11	0.0424059	0.0452456	1.06e-11	9.05e-10	1.29e-10	2.17e-08	antisense
GJB2	ENSG00000165474	1689.7	-123.225	535.594	3.9e-12	1.96e-11	3.44e-11	6.25e-10	4.93e-05	6.42e-05	0.0088693	0.0117339	protein_coding	2706
MRPL49	ENSG00000149792	1599.17	2081.64	2821.56	3.95e-12	1.98e-11	1.06e-07	7.19e-07	2.13e-08	1.03e-07	0.000134917	0.000346735	protein_coding	740
GADD45A	ENSG00000116717	1068.71	1428.27	3749.92	4.02e-12	2.02e-11	0.00100384	0.00207605	7.85e-11	1.93e-09	5.02e-09	9.43e-08	protein_coding	1647
CFB	ENSG00000243649	521.932	2215.76	3123.12	4.04e-12	2.03e-11	7.43e-10	9.05e-09	6.56e-07	1.72e-06	0.0936119	0.0785171	protein_coding	629
TAF13	ENSG00000197780	644.945	758.11	1508.75	4.13e-12	2.07e-11	0.000613314	0.00137224	2.3e-10	3.78e-09	1.28e-09	3.97e-08	protein_coding	6884
SNRPD2	ENSG00000125743	3410.7	5506.75	5683.52	4.16e-12	2.08e-11	1.39e-11	2.72e-10	6.33e-05	7.96e-05	0.678493	0.32922	protein_coding	6633
HES6	ENSG00000144485	657.795	147.881	-132.454	4.19e-12	2.09e-11	9.15e-08	6.29e-07	1.21e-09	1.18e-08	0.142569	0.108723	protein_coding	55502
U2AF1L5	ENSG00000275895	481.759	300.076	985.938	4.32e-12	2.15e-11	5.83e-06	2.35e-05	8.65e-08	3.19e-07	2.03e-09	5.15e-08	protein_coding	102724594
CD63	ENSG00000135404	10043.5	15102.6	17081	4.33e-12	2.15e-11	1.16e-09	1.35e-08	4.07e-07	1.16e-06	0.103705	0.08496	protein_coding	967
MAP3K5	ENSG00000197442	619.556	693.438	2837.59	4.34e-12	2.16e-11	0.165769	0.128618	3.71e-12	9.05e-10	1.1e-10	2.17e-08	protein_coding	4217
LILRA2	ENSG00000274000	16.0645	67.4073	32.5419	4.36e-12	2.16e-11	5.76e-12	1.28e-10	0.0214083	0.0116799	2.81e-05	9.22e-05	protein_coding	11027
WDR61	ENSG00000140395	866.347	1233.16	1289.48	4.37e-12	2.16e-11	3.28e-11	6.03e-10	2.15e-05	3.2e-05	0.439309	0.247049	protein_coding	80349
SF3A2	ENSG00000104897	753.055	996.171	1426.33	4.38e-12	2.16e-11	3.08e-06	1.36e-05	1.12e-09	1.12e-08	2.81e-05	9.22e-05	protein_coding	8175
EPN1	ENSG00000063245	2227.53	2646.07	4875.35	4.4e-12	2.17e-11	0.00120216	0.00241756	7.85e-11	1.93e-09	4.32e-09	8.5e-08	protein_coding	29924
SLC9A3	ENSG00000066230	61.6279	-10.173	85.1194	4.47e-12	2.2e-11	4.98e-13	1.52e-11	0.346603	0.122663	0.000243671	0.000571828	protein_coding	6550
IGLON5	ENSG00000142549	67.4775	245.453	357.68	4.48e-12	2.2e-11	6.82e-10	8.42e-09	6.56e-07	1.72e-06	0.204687	0.143038	protein_coding	402665
ZNF585B	ENSG00000245680	488.463	1281.84	1612.95	4.53e-12	2.23e-11	8.37e-11	1.34e-09	7.8e-06	1.36e-05	0.295754	0.186681	protein_coding	92285
ITM2B	ENSG00000136156	14899.7	17316.2	48122.1	4.69e-12	2.3e-11	0.0530924	0.053909	7.39e-12	9.05e-10	2.67e-10	2.17e-08	protein_coding	9445
C19orf68	ENSG00000185453	248.264	340.114	456.876	4.78e-12	2.34e-11	4.53e-08	3.4e-07	3.21e-08	1.44e-07	0.00121328	0.00225765	protein_coding	374920
TAF4	ENSG00000130699	585.071	922.565	1137.04	4.8e-12	2.35e-11	5.86e-10	7.39e-09	1.16e-06	2.75e-06	0.0799653	0.0693305	protein_coding	100302168
TAF4	ENSG00000130699	585.071	922.565	1137.04	4.8e-12	2.35e-11	5.86e-10	7.39e-09	1.16e-06	2.75e-06	0.0799653	0.0693305	protein_coding	6874
2017-03-09	ENSG00000139266	497.132	371.2	929.777	4.81e-12	2.35e-11	0.00012593	0.000346478	4.92e-09	3.4e-08	5.9e-10	2.55e-08	protein_coding	92979
PTH1R	ENSG00000160801	225.913	13.5622	1029.21	4.85e-12	2.37e-11	4.83e-07	2.71e-06	5.54e-07	1.5e-06	1.74e-08	2.28e-07	protein_coding	5745
FAM155A	ENSG00000204442	108.791	99.2567	915.478	4.87e-12	2.38e-11	0.141276	0.114	3.54e-12	9.05e-10	1.94e-10	2.17e-08	protein_coding	728215
AFF1	ENSG00000172493	2008.2	2385.06	4994.38	4.91e-12	2.39e-11	0.00308498	0.00532545	4.45e-11	1.39e-09	2.55e-09	5.93e-08	protein_coding	4299
CLDN3	ENSG00000165215	4525.65	6886.63	13314.4	4.96e-12	2.41e-11	1.12e-05	4.17e-05	8.05e-10	8.97e-09	3e-06	1.43e-05	protein_coding	1365
EEF2K	ENSG00000103319	2016.03	1603.55	5114.72	5e-12	2.43e-11	0.0130497	0.0176591	5.79e-11	1.62e-09	1.29e-10	2.17e-08	protein_coding	29904
EEF2K	ENSG00000103319	2016.03	1603.55	5114.72	5e-12	2.43e-11	0.0130497	0.0176591	5.79e-11	1.62e-09	1.29e-10	2.17e-08	protein_coding	101930123
CTSV	ENSG00000136943	902.8	-113.138	323.17	5.04e-12	2.44e-11	5.24e-12	1.18e-10	0.00190507	0.00147545	0.007386	0.0101303	protein_coding	1515
CEP44	ENSG00000164118	876.186	597.983	5256.79	5.05e-12	2.44e-11	0.080658	0.0745626	9.29e-12	9.05e-10	1.1e-10	2.17e-08	protein_coding	80817
ZDHHC8	ENSG00000099904	539.72	650.323	1380.16	5.18e-12	2.5e-11	0.000786358	0.00168532	1.32e-10	2.61e-09	5.82e-09	1.03e-07	protein_coding	29801
LYG1	ENSG00000144214	36.6244	-6.56659	10.6508	5.28e-12	2.55e-11	3.48e-12	8.35e-11	0.00313364	0.00226106	0.0122214	0.0152806	protein_coding	129530
PLAGL1	ENSG00000118495	377.417	317.677	1834.54	5.4e-12	2.6e-11	0.109497	0.0940127	6.16e-12	9.05e-10	1.52e-10	2.17e-08	protein_coding	5325
	ENSG00000258938	121.574	103.081	309.113	5.4e-12	2.6e-11	0.0420606	0.044972	1.91e-11	9.6e-10	1.19e-10	2.17e-08	antisense
	ENSG00000259445	57.6712	28.5106	23.6595	5.42e-12	2.6e-11	1.24e-09	1.43e-08	5.54e-07	1.5e-06	0.0843222	0.072256	lincRNA
CR1L	ENSG00000197721	10.8305	19.0178	123.341	5.43e-12	2.61e-11	0.047497	0.0493743	7.39e-12	9.05e-10	5.04e-10	2.42e-08	protein_coding	1379
GATA4	ENSG00000136574	98.1435	176.434	587.757	5.45e-12	2.61e-11	0.00145312	0.00284204	4.45e-11	1.39e-09	2.01e-08	2.55e-07	protein_coding	2626
LGALS3	ENSG00000131981	4128.12	4901.77	14644.5	5.51e-12	2.64e-11	0.0522609	0.0532501	9.72e-12	9.05e-10	2.46e-10	2.17e-08	protein_coding	3958
FLNB-AS1	ENSG00000244161	28.4887	18.8825	124.653	5.59e-12	2.67e-11	0.0257194	0.030534	3.41e-11	1.22e-09	1.19e-10	2.17e-08	antisense	105377105
	ENSG00000261505	64.1484	46.6635	195.85	5.63e-12	2.69e-11	0.00984686	0.0139593	8.56e-11	2.04e-09	1.52e-10	2.17e-08	antisense
F3	ENSG00000117525	1048.25	759.326	5322.84	5.68e-12	2.71e-11	0.00900648	0.0129706	2.86e-11	1.14e-09	8.72e-10	3.16e-08	protein_coding	2152
GDI1	ENSG00000203879	1955.04	2867.03	3781.53	5.82e-12	2.77e-11	5.67e-09	5.42e-08	1.83e-07	6e-07	0.0150387	0.0181374	protein_coding	2664
ATXN10	ENSG00000130638	2049.37	2588.73	3720.31	5.84e-12	2.77e-11	2.77e-07	1.66e-06	2.05e-08	1e-07	3.49e-05	0.000110932	protein_coding	25814
UBE2I	ENSG00000103275	1965.78	2656.39	3361.08	5.89e-12	2.8e-11	1.49e-08	1.29e-07	9.99e-08	3.6e-07	0.00371206	0.00568457	protein_coding	7329
KLC3	ENSG00000104892	112.822	240.507	371.72	5.9e-12	2.8e-11	3.25e-09	3.33e-08	6.34e-07	1.68e-06	0.00210587	0.00354802	protein_coding	147700
UQCRC2	ENSG00000140740	3622.76	5155.84	6160.53	5.96e-12	2.82e-11	1.07e-09	1.26e-08	8.87e-07	2.2e-06	0.0498508	0.0479655	protein_coding	7385
GOLGA6L5P	ENSG00000230373	77.5418	63.6368	276.185	6.09e-12	2.87e-11	0.0459925	0.0482061	1.6e-11	9.05e-10	1.79e-10	2.17e-08	transcribed_unprocessed_pseudogene	642402
GAREM1	ENSG00000141441	620.098	500.869	2633.86	6.09e-12	2.87e-11	0.0873726	0.0793438	9.72e-12	9.05e-10	1.4e-10	2.17e-08	protein_coding	64762
IVNS1ABP	ENSG00000116679	6542.64	4779.11	19477	6.2e-12	2.92e-11	0.00315385	0.00542196	4.45e-11	1.39e-09	2.97e-09	6.63e-08	protein_coding	10625
SELENOK	ENSG00000113811	771.206	1014.3	1258.82	6.22e-12	2.92e-11	6.02e-09	5.73e-08	1.48e-07	5e-07	0.0289645	0.0311313	protein_coding	58515
SCAF4	ENSG00000156304	737.944	957.487	1444.26	6.32e-12	2.97e-11	4.88e-06	2.01e-05	2.51e-09	2.02e-08	3.59e-06	1.66e-05	protein_coding	57466
PPA2	ENSG00000138777	1131.14	1718.95	1630.06	6.34e-12	2.97e-11	7.32e-12	1.57e-10	0.000286142	0.000289127	0.573431	0.296371	protein_coding	27068
RBKS	ENSG00000171174	205.878	263.801	568.957	6.45e-12	3.02e-11	0.000279737	0.000693123	3.09e-10	4.53e-09	1.87e-08	2.41e-07	protein_coding	64080
OSBPL11	ENSG00000144909	786.851	993.884	1565.83	6.51e-12	3.04e-11	6.22e-06	2.48e-05	5.99e-09	3.95e-08	1.83e-07	1.44e-06	protein_coding	114885
PNKD	ENSG00000127838	2422.55	2959.17	5829.51	6.57e-12	3.07e-11	0.0021056	0.00388884	6.31e-11	1.72e-09	6.75e-09	1.15e-07	protein_coding	25953
TMEM245	ENSG00000106771	2412.33	2779.79	6003.07	6.58e-12	3.07e-11	0.00222899	0.00407372	1.57e-10	2.96e-09	6.9e-10	2.77e-08	protein_coding	23731
PPP2R1A	ENSG00000105568	5494.16	6539.07	10232.4	6.62e-12	3.09e-11	0.000133093	0.000363998	3.97e-10	5.38e-09	7.09e-08	6.73e-07	protein_coding	5518
GPR87	ENSG00000138271	15.6238	83.6499	88.8308	6.63e-12	3.09e-11	3.21e-11	5.92e-10	4.05e-05	5.45e-05	0.847904	0.377188	protein_coding	53836
CAPSL	ENSG00000152611	164.923	-27.3093	23.1124	6.8e-12	3.15e-11	7.65e-11	1.25e-09	4.41e-05	5.86e-05	0.00401603	0.00606683	protein_coding	133690
RPL4P4	ENSG00000229638	11.4536	-2.27951	-1.48738	6.8e-12	3.15e-11	1.31e-10	2e-09	6.49e-06	1.17e-05	0.916235	0.395342	processed_pseudogene
ATPIF1	ENSG00000130770	1617.06	2302.49	3088.63	6.81e-12	3.15e-11	6.8e-09	6.4e-08	2.6e-07	8.07e-07	0.00526618	0.007645	protein_coding	93974
ADK	ENSG00000156110	550.917	917.187	1041.7	6.83e-12	3.16e-11	6.67e-11	1.12e-09	1.65e-05	2.56e-05	0.590398	0.30179	protein_coding	132
PTOV1	ENSG00000104960	2203.08	2926.55	3975.41	6.85e-12	3.16e-11	4.58e-07	2.59e-06	9.54e-09	5.58e-08	0.000116001	0.000305321	protein_coding	53635
PRRX2	ENSG00000167157	204.978	281.833	1228.63	6.86e-12	3.17e-11	0.0227209	0.027713	2.29e-11	1.03e-09	3.98e-10	2.21e-08	protein_coding	51450
HLA-DQB1	ENSG00000231286	896.248	-11.7197	-2.64884	6.97e-12	3.21e-11	1.37e-10	2.07e-09	6.69e-06	1.2e-05	0.715092	0.340646	protein_coding	3119
NAPSA	ENSG00000131400	117.498	82.2274	2207.98	6.97e-12	3.21e-11	0.359664	0.223612	3.54e-12	9.05e-10	1.29e-10	2.17e-08	protein_coding	9476
NELFE	ENSG00000231044	177.992	286.367	300.898	7e-12	3.21e-11	3.36e-11	6.15e-10	4.16e-05	5.59e-05	0.799757	0.364306	protein_coding	7936
NELFE	ENSG00000231044	177.992	286.367	300.898	7e-12	3.21e-11	3.36e-11	6.15e-10	4.16e-05	5.59e-05	0.799757	0.364306	protein_coding	100302242
SLC25A30	ENSG00000174032	530.415	447.297	1307.42	7.06e-12	3.24e-11	0.0601511	0.0593775	1.6e-11	9.05e-10	1.65e-10	2.17e-08	protein_coding	253512
SLC6A12	ENSG00000111181	359.001	404.129	2270.19	7.06e-12	3.24e-11	0.298994	0.196645	3.54e-12	9.05e-10	1.79e-10	2.17e-08	protein_coding	6539
SLC25A39	ENSG00000013306	2633.54	3596.09	5090.49	7.18e-12	3.29e-11	9.87e-08	6.74e-07	3.87e-08	1.67e-07	0.000295371	0.00067453	protein_coding	51629
RNF26	ENSG00000173456	958.691	1438.23	1682.85	7.19e-12	3.29e-11	3.55e-10	4.77e-09	3.06e-06	6.23e-06	0.152955	0.114792	protein_coding	79102
ZFYVE21	ENSG00000100711	903.066	1059.86	2037.11	7.2e-12	3.29e-11	0.00301748	0.00522206	5.3e-11	1.54e-09	5.82e-09	1.03e-07	protein_coding	79038
EIF3I	ENSG00000084623	3368	4438.01	5594.32	7.22e-12	3.29e-11	4.71e-09	4.61e-08	3.55e-07	1.04e-06	0.00919608	0.0120989	protein_coding	8668
	ENSG00000278071	20.7221	15.2065	79.1747	7.27e-12	3.31e-11	0.0300729	0.0345924	3.12e-11	1.16e-09	1.94e-10	2.17e-08	lincRNA
PPEF1	ENSG00000086717	13.3257	116.315	150.889	7.32e-12	3.33e-11	2.98e-10	4.07e-09	2.69e-06	5.6e-06	0.651527	0.321011	protein_coding	5475
	ENSG00000279072	32.9816	27.3008	94.1829	7.38e-12	3.35e-11	0.0397097	0.0430081	2.5e-11	1.07e-09	1.79e-10	2.17e-08	lincRNA
UCKL1	ENSG00000198276	756.527	1114.93	1363.2	7.38e-12	3.35e-11	4.82e-10	6.23e-09	2.37e-06	5.02e-06	0.117517	0.0936663	protein_coding	100302137
UCKL1	ENSG00000198276	756.527	1114.93	1363.2	7.38e-12	3.35e-11	4.82e-10	6.23e-09	2.37e-06	5.02e-06	0.117517	0.0936663	protein_coding	54963
PFDN6	ENSG00000237335	138.844	229.658	269.651	7.42e-12	3.36e-11	9.59e-11	1.52e-09	1.23e-05	1.99e-05	0.461585	0.255926	protein_coding	10471
PFDN6	ENSG00000237335	138.844	229.658	269.651	7.42e-12	3.36e-11	9.59e-11	1.52e-09	1.23e-05	1.99e-05	0.461585	0.255926	protein_coding	102465501
RCAN1	ENSG00000159200	1800.56	154.33	517.437	7.45e-12	3.37e-11	8e-11	1.3e-09	1.91e-05	2.9e-05	0.132733	0.102934	protein_coding	1827
NCF1C	ENSG00000165178	71.6301	162.699	32.0702	7.45e-12	3.37e-11	6.98e-12	1.51e-10	0.0454954	0.02231	2.81e-05	9.22e-05	unprocessed_pseudogene	654817
IGFALS	ENSG00000099769	79.187	-7.96085	75.1105	7.6e-12	3.43e-11	1.94e-12	4.95e-11	0.275041	0.101255	0.000122009	0.000318331	protein_coding	3483
FAM46C	ENSG00000183508	1094.77	294.378	-19.3515	7.61e-12	3.43e-11	5.81e-08	4.23e-07	8.17e-09	4.95e-08	0.0698694	0.0624473	protein_coding	54855
PNPLA2	ENSG00000177666	1611.62	2138.63	3237.13	7.67e-12	3.45e-11	4.75e-07	2.67e-06	2.29e-08	1.09e-07	1.37e-05	5.07e-05	protein_coding	57104
NABP1	ENSG00000173559	994.865	820.178	6157.5	7.79e-12	3.5e-11	0.183043	0.138133	5.12e-12	9.05e-10	2.27e-10	2.17e-08	protein_coding	64859
NELFE	ENSG00000206357	178.293	286.918	300.734	7.86e-12	3.52e-11	3.21e-11	5.92e-10	5.36e-05	6.9e-05	0.724349	0.343255	protein_coding	100302242
NELFE	ENSG00000206357	178.293	286.918	300.734	7.86e-12	3.52e-11	3.21e-11	5.92e-10	5.36e-05	6.9e-05	0.724349	0.343255	protein_coding	7936
SSC5D	ENSG00000179954	191.011	421.473	151.566	7.86e-12	3.52e-11	4.32e-12	1e-10	0.249999	0.0937882	1.81e-05	6.4e-05	protein_coding	284297
PACS1	ENSG00000175115	1831.4	2717.97	3339.76	7.95e-12	3.55e-11	1.96e-08	1.64e-07	7.21e-08	2.74e-07	0.0118003	0.0148624	protein_coding	55690
TUBGCP3	ENSG00000126216	544.507	775.901	899.624	7.95e-12	3.55e-11	1.32e-09	1.52e-08	1.24e-06	2.91e-06	0.0263448	0.0288477	protein_coding	10426
L1CAM	ENSG00000198910	694.725	1836.92	2547.5	7.97e-12	3.56e-11	4.96e-11	8.61e-10	2.96e-05	4.21e-05	0.598968	0.304274	protein_coding	3897
SLC45A4	ENSG00000022567	1695.55	1138.88	9710.4	7.98e-12	3.56e-11	0.0986295	0.0869238	1.6e-11	9.05e-10	1.01e-10	2.17e-08	protein_coding	57210
IGSF1	ENSG00000147255	374.128	-337.779	293.962	8.06e-12	3.59e-11	3.01e-12	7.27e-11	0.844545	0.247708	1.91e-05	6.7e-05	protein_coding	3547
FAM160B2	ENSG00000158863	802.137	681.682	1909.54	8.08e-12	3.59e-11	0.0126803	0.0172246	5.54e-11	1.59e-09	4.3e-10	2.24e-08	protein_coding	64760
PCED1B	ENSG00000179715	130.081	115.211	361.215	8.17e-12	3.63e-11	0.0403697	0.0435564	1.22e-11	9.05e-10	6.38e-10	2.63e-08	protein_coding	91523
C10orf76	ENSG00000120029	610.682	715.33	1207.12	8.23e-12	3.65e-11	0.000464261	0.00107708	2.96e-10	4.4e-09	1.3e-08	1.84e-07	protein_coding	79591
IGLV2-8	ENSG00000278196	146.423	624.58	-27.0178	8.27e-12	3.66e-11	6.5e-12	1.42e-10	0.0173531	0.00977398	8.54e-05	0.00023602	IG_V_gene	723778
C16orf70	ENSG00000125149	434.195	515.34	960.489	8.35e-12	3.69e-11	0.000677775	0.00149115	2.4e-10	3.86e-09	9.05e-09	1.42e-07	protein_coding	80262
GGT1	ENSG00000100031	261.817	368.889	3020.06	8.4e-12	3.7e-11	0.41184	0.245605	4.07e-12	9.05e-10	1.4e-10	2.17e-08	protein_coding	91227
GGT1	ENSG00000100031	261.817	368.889	3020.06	8.4e-12	3.7e-11	0.41184	0.245605	4.07e-12	9.05e-10	1.4e-10	2.17e-08	protein_coding	102724197
GGT1	ENSG00000100031	261.817	368.889	3020.06	8.4e-12	3.7e-11	0.41184	0.245605	4.07e-12	9.05e-10	1.4e-10	2.17e-08	protein_coding	728441
GGT1	ENSG00000100031	261.817	368.889	3020.06	8.4e-12	3.7e-11	0.41184	0.245605	4.07e-12	9.05e-10	1.4e-10	2.17e-08	protein_coding	2678
TAP1	ENSG00000224212	232.111	949.496	1117.09	8.58e-12	3.78e-11	1.61e-10	2.36e-09	7.11e-06	1.26e-05	0.975322	0.40949	protein_coding	6890
TAF6	ENSG00000106290	1076.66	1554.31	1842.95	8.67e-12	3.82e-11	2.38e-09	2.55e-08	6.34e-07	1.68e-06	0.038209	0.0387776	protein_coding	6878
DCUN1D5	ENSG00000137692	616.874	944.017	863.134	8.7e-12	3.82e-11	1.85e-12	4.73e-11	0.004029	0.00280319	0.237327	0.159229	protein_coding	84259
MYPOP	ENSG00000176182	120.847	153.588	261.378	8.72e-12	3.83e-11	3.95e-05	0.000127436	9.49e-10	1.01e-08	4.6e-07	3e-06	protein_coding	339344
	ENSG00000272941	26.7812	21.5452	88.0359	8.78e-12	3.85e-11	0.0574179	0.057291	2.73e-11	1.12e-09	1.29e-10	2.17e-08	antisense
ABHD16A	ENSG00000206403	24.4277	86.9832	108.048	8.79e-12	3.85e-11	5.74e-10	7.29e-09	1.41e-06	3.25e-06	0.799757	0.364306	protein_coding	7920
CHRNA6	ENSG00000147434	6.45743	68.1072	15.5987	8.81e-12	3.85e-11	1.38e-12	3.68e-11	0.452261	0.15208	0.000243671	0.000571828	protein_coding	8973
CYP8B1	ENSG00000180432	24.7884	14.0141	177.293	8.81e-12	3.85e-11	0.0830495	0.0762021	2.09e-11	9.87e-10	1.1e-10	2.17e-08	protein_coding	1582
SPC25	ENSG00000277909	99.6749	223.692	228.981	8.87e-12	3.87e-11	1.2e-11	2.41e-10	0.000245653	0.000252809	0.581886	0.299139	protein_coding	57405
GNB1	ENSG00000078369	6631.18	8796.42	11864	8.92e-12	3.89e-11	8.33e-08	5.82e-07	4.48e-08	1.88e-07	0.000746649	0.00149569	protein_coding	2782
SYNJ1	ENSG00000159082	255.218	311.43	575.492	9e-12	3.91e-11	0.00019507	0.000507936	4.9e-10	6.22e-09	4.37e-08	4.66e-07	protein_coding	8867
SEC14L6	ENSG00000214491	51.6628	43.456	394.573	9.12e-12	3.96e-11	0.163699	0.127393	6.16e-12	9.05e-10	2.89e-10	2.17e-08	protein_coding	730005
TMEM50A	ENSG00000183726	2314.65	3093.96	3801.45	9.18e-12	3.99e-11	2.3e-08	1.88e-07	8.97e-08	3.29e-07	0.00685789	0.00953011	protein_coding	23585
MYLK4	ENSG00000145949	67.3046	47.394	327.066	9.2e-12	3.99e-11	0.0518492	0.0529147	3.26e-11	1.19e-09	1.29e-10	2.17e-08	protein_coding	340156
ERVMER34-1	ENSG00000226887	1502.99	-505.645	-107.084	9.22e-12	3.99e-11	1.26e-10	1.94e-09	1.16e-05	1.9e-05	0.389802	0.227422	protein_coding	100288413
LINC00174	ENSG00000179406	145.229	89.1545	248.051	9.25e-12	4e-11	1.26e-07	8.31e-07	3.82e-06	7.49e-06	6.18e-08	6.1e-07	lincRNA	285908
	ENSG00000229591	4.80877	3.45622	21.0621	9.25e-12	4e-11	0.12883	0.106578	1.46e-11	9.05e-10	1.1e-10	2.17e-08	antisense
MYH11	ENSG00000276480	1.61278	5113.9	9502.58	9.31e-12	4.02e-11	4.81e-09	4.68e-08	3.67e-07	1.07e-06	0.0224328	0.0253026	protein_coding	4629
POLR2F	ENSG00000100142	621.118	957.073	994.078	9.34e-12	4.02e-11	3.21e-11	5.92e-10	7.27e-05	8.94e-05	0.590398	0.30179	protein_coding	5435
GPX2	ENSG00000176153	485.148	-127.743	-75.8541	9.36e-12	4.03e-11	3.28e-11	6.03e-10	9.8e-05	0.000115481	0.175441	0.127335	protein_coding	2877
ZNF383	ENSG00000188283	296.045	653.158	759.842	9.39e-12	4.04e-11	9.81e-11	1.55e-09	1.56e-05	2.44e-05	0.985192	0.412009	protein_coding	163087
PAQR6	ENSG00000160781	117.037	12.046	218.953	9.47e-12	4.06e-11	6.97e-10	8.58e-09	0.00159437	0.00126387	4.31e-07	2.86e-06	protein_coding	79957
CXCL14	ENSG00000145824	4604.88	-1986.59	4430.82	9.49e-12	4.07e-11	7.61e-13	2.16e-11	0.656714	0.204286	0.000746649	0.00149569	protein_coding	9547
ANK1	ENSG00000029534	123.799	83.9801	1172.01	9.63e-12	4.12e-11	0.0233365	0.0282882	1.83e-11	9.33e-10	1.19e-09	3.79e-08	protein_coding	286
COL4A3	ENSG00000169031	149.36	8.37078	766.463	9.63e-12	4.12e-11	1.42e-06	6.96e-06	1.43e-07	4.86e-07	6.18e-08	6.1e-07	protein_coding	1285
HNF1A-AS1	ENSG00000241388	44.2157	54.5309	384.703	9.65e-12	4.12e-11	0.886275	0.403216	3.88e-12	9.05e-10	1.1e-10	2.17e-08	processed_transcript	283460
RELB	ENSG00000104856	531.461	751.133	1050.69	9.75e-12	4.16e-11	2.04e-08	1.69e-07	1.65e-07	5.48e-07	0.00219492	0.00367068	protein_coding	5971
	ENSG00000232233	167.387	124.601	496.56	9.91e-12	4.22e-11	0.0117399	0.0161433	1.21e-10	2.5e-09	2.46e-10	2.17e-08	lincRNA	102724699
MFSD1	ENSG00000118855	1543.46	2266.44	2483.15	9.92e-12	4.22e-11	1.68e-10	2.44e-09	9.65e-06	1.63e-05	0.383017	0.224652	protein_coding	64747
FST	ENSG00000134363	87.9656	513.862	510.138	1.01e-11	4.27e-11	3.44e-11	6.25e-10	7.47e-05	9.14e-05	0.573431	0.296371	protein_coding	10468
ANKS3	ENSG00000168096	341.711	310.196	906.866	1.01e-11	4.31e-11	0.226719	0.161214	7.74e-12	9.05e-10	1.65e-10	2.17e-08	protein_coding	124401
BCS1L	ENSG00000074582	428.108	533.53	839.638	1.02e-11	4.32e-11	3.26e-05	0.000107777	1.43e-09	1.34e-08	4.6e-07	3e-06	protein_coding	617
CPVL	ENSG00000106066	936.519	1433.08	2638.71	1.05e-11	4.43e-11	3.82e-06	1.63e-05	6.73e-09	4.32e-08	3e-06	1.43e-05	protein_coding	54504
PLCH2	ENSG00000149527	136.869	36.8737	527.551	1.06e-11	4.49e-11	3.73e-05	0.00012114	2.13e-08	1.03e-07	3.72e-09	7.63e-08	protein_coding	9651
YTHDC1	ENSG00000083896	1955.35	2228.47	3601.48	1.08e-11	4.56e-11	0.00159596	0.00307328	1.26e-10	2.55e-09	1.21e-08	1.76e-07	protein_coding	91746
CHKB	ENSG00000100288	429.398	518.471	1077.11	1.09e-11	4.59e-11	0.000922071	0.00192849	2.5e-10	3.94e-09	9.05e-09	1.42e-07	protein_coding	1120
TRBV5-4	ENSG00000230099	21.0796	-3.42456	3.85205	1.1e-11	4.61e-11	1.15e-11	2.31e-10	0.00105818	0.000887032	0.0370712	0.0378342	TR_V_gene
BLVRB	ENSG00000090013	676.263	1026.69	1428.5	1.1e-11	4.61e-11	3.84e-09	3.83e-08	9.48e-07	2.32e-06	0.00469269	0.006922	protein_coding	645
HACL1	ENSG00000131373	358.442	567.608	606.386	1.1e-11	4.61e-11	5.08e-11	8.78e-10	4.53e-05	6e-05	0.857608	0.3797	protein_coding	26061
TMOD1	ENSG00000136842	1343.04	2878.27	4100.27	1.1e-11	4.62e-11	5.38e-10	6.88e-09	3.16e-06	6.41e-06	0.200304	0.140729	protein_coding	7111
VAV2	ENSG00000160293	1159.03	1281.9	3712.88	1.11e-11	4.64e-11	0.0958818	0.0851812	1.46e-11	9.05e-10	2.46e-10	2.17e-08	protein_coding	7410
GTF2IP20	ENSG00000272645	180.405	154.547	417.701	1.11e-11	4.66e-11	0.00918749	0.01318	7.2e-11	1.83e-09	1.02e-09	3.44e-08	transcribed_unprocessed_pseudogene
S100A8	ENSG00000143546	1184.74	-551.757	462.605	1.12e-11	4.69e-11	9.73e-12	2.01e-10	0.00641941	0.00417175	0.00144133	0.00260763	protein_coding	6279
MFSD12	ENSG00000161091	1164.04	1265.45	4269.25	1.13e-11	4.73e-11	0.0958818	0.0851812	1.4e-11	9.05e-10	2.89e-10	2.17e-08	protein_coding	126321
GAL3ST1	ENSG00000128242	65.2578	93.5052	380.757	1.16e-11	4.86e-11	0.0327548	0.0369916	1.6e-11	9.05e-10	1.88e-09	4.95e-08	protein_coding	9514
MYBL2	ENSG00000101057	930.131	1947	1772.13	1.17e-11	4.88e-11	5.63e-12	1.26e-10	0.00203527	0.00156092	0.114645	0.0918194	protein_coding	4605
MLST8	ENSG00000167965	715.879	896.745	1396.81	1.18e-11	4.9e-11	3.78e-05	0.000122778	9.89e-10	1.03e-08	1.27e-06	6.99e-06	protein_coding	64223
PAPLN	ENSG00000100767	469.031	399.043	3533.32	1.18e-11	4.91e-11	0.28343	0.189584	5.12e-12	9.05e-10	3.39e-10	2.17e-08	protein_coding	89932
RIOK1	ENSG00000124784	609.321	995.228	1041.18	1.19e-11	4.92e-11	7.31e-11	1.21e-09	3.23e-05	4.52e-05	0.985192	0.412009	protein_coding	83732
LAMP3	ENSG00000078081	276.306	1011.26	766.146	1.19e-11	4.93e-11	4.12e-12	9.62e-11	0.00378566	0.00265761	0.0821203	0.070729	protein_coding	27074
	ENSG00000280279	112.217	86.8227	315.6	1.19e-11	4.93e-11	0.00814834	0.0119513	1.5e-10	2.86e-09	5.04e-10	2.42e-08	lincRNA
C12orf74	ENSG00000214215	10.0934	30.1513	9.53473	1.19e-11	4.94e-11	6.65e-12	1.45e-10	0.911526	0.261782	8.17e-06	3.29e-05	protein_coding	338809
MYH7B	ENSG00000078814	744.834	-395.477	160.669	1.22e-11	5.05e-11	1.23e-10	1.91e-09	4.66e-05	6.14e-05	0.00824671	0.011086	protein_coding	57644
SOWAHC	ENSG00000198142	512.882	711.344	1192.4	1.24e-11	5.09e-11	8.84e-06	3.39e-05	2.41e-09	1.96e-08	7.71e-06	3.13e-05	protein_coding	65124
NR2F2-AS1	ENSG00000247809	25.4278	34.0606	96.5145	1.24e-11	5.09e-11	0.0109684	0.015299	3.12e-11	1.16e-09	5.4e-09	9.84e-08	antisense	644192
GALNT11	ENSG00000178234	1625.36	1548.65	8393.74	1.25e-11	5.12e-11	0.899737	0.406725	5.88e-12	9.05e-10	1.01e-10	2.17e-08	protein_coding	63917
TCEA2	ENSG00000171703	641.361	1098.13	1162.69	1.25e-11	5.13e-11	8.37e-11	1.34e-09	2.96e-05	4.21e-05	0.857608	0.3797	protein_coding	6919
	ENSG00000273243	3.46532	3.05014	16.434	1.26e-11	5.16e-11	0.21516	0.155419	6.75e-12	9.05e-10	3.67e-10	2.17e-08	lincRNA
PCOLCE	ENSG00000106333	1936.39	409.399	1025.56	1.27e-11	5.18e-11	2.36e-12	5.88e-11	0.00982985	0.00601887	0.0698694	0.0624473	protein_coding	5118
	ENSG00000279041	20.9842	17.0876	201.366	1.29e-11	5.27e-11	0.886275	0.403216	6.16e-12	9.05e-10	1.01e-10	2.17e-08	TEC
S1PR1	ENSG00000170989	253.488	514.881	540.22	1.29e-11	5.29e-11	2e-10	2.87e-09	1.02e-05	1.71e-05	0.696704	0.33516	protein_coding	1901
SNX11	ENSG00000002919	448.845	585.428	796.661	1.3e-11	5.3e-11	1.43e-07	9.35e-07	3.46e-08	1.53e-07	0.00116173	0.00217835	protein_coding	29916
	ENSG00000259275	14.4522	18.3709	61.0368	1.3e-11	5.3e-11	0.0634752	0.0619092	1.33e-11	9.05e-10	1.02e-09	3.44e-08	lincRNA
ASPRV1	ENSG00000244617	65.4071	12.32	6.87599	1.31e-11	5.31e-11	4.93e-10	6.35e-09	3.37e-06	6.76e-06	0.607594	0.306939	protein_coding	151516
SLC35A2	ENSG00000102100	1066.7	1678.92	2247.87	1.32e-11	5.36e-11	4.81e-09	4.68e-08	5.17e-07	1.42e-06	0.0338293	0.035228	protein_coding	7355
FOXP4	ENSG00000137166	1596.11	3291	3523.71	1.34e-11	5.42e-11	8.37e-11	1.34e-09	3.23e-05	4.52e-05	0.678493	0.32922	protein_coding	116113
RPS6KB2	ENSG00000175634	799.129	1103.91	1277.26	1.34e-11	5.42e-11	1.35e-09	1.55e-08	1.61e-06	3.64e-06	0.114645	0.0918194	protein_coding	6199
	ENSG00000263551	112.584	59.9567	48.1099	1.35e-11	5.47e-11	8.63e-10	1.04e-08	3.16e-06	6.41e-06	0.0698694	0.0624473	lincRNA
	ENSG00000265413	6.78983	8.51278	38.6302	1.35e-11	5.47e-11	0.0938615	0.0837965	1.33e-11	9.05e-10	5.45e-10	2.53e-08	sense_intronic
ATP5B	ENSG00000110955	13481.3	19043.7	21505.5	1.36e-11	5.47e-11	3.12e-10	4.24e-09	8.81e-06	1.51e-05	0.132733	0.102934	protein_coding	506
PPP1R13L	ENSG00000104881	436.301	647.791	963.346	1.36e-11	5.5e-11	1.49e-07	9.69e-07	4.16e-08	1.78e-07	0.000746649	0.00149569	protein_coding	10848
CDK11A	ENSG00000008128	301.148	435.186	617.386	1.38e-11	5.58e-11	5.28e-07	2.92e-06	2.21e-08	1.06e-07	9.96e-05	0.000268423	protein_coding	728642
SQLE	ENSG00000104549	1819.49	3392.16	4480.38	1.39e-11	5.59e-11	2.99e-09	3.1e-08	7.26e-07	1.87e-06	0.0821203	0.070729	protein_coding	6713
MT-CO3	ENSG00000198938	62899.2	103616	122862	1.4e-11	5.62e-11	2.28e-09	2.47e-08	1.08e-06	2.6e-06	0.0661355	0.0598141	protein_coding	4514
C10orf88	ENSG00000119965	264.942	293.485	667.909	1.42e-11	5.71e-11	0.0615576	0.0604557	2.73e-11	1.12e-09	3.13e-10	2.17e-08	protein_coding	80007
FOXP3	ENSG00000049768	30.9848	61.4067	57.9061	1.44e-11	5.76e-11	5.63e-12	1.26e-10	0.00174337	0.00136479	0.313233	0.194534	protein_coding	50943
DPY30	ENSG00000162961	1055.67	1508.75	1772.72	1.47e-11	5.87e-11	2.76e-09	2.89e-08	8.87e-07	2.2e-06	0.0757931	0.0664909	protein_coding	84661
CD37	ENSG00000104894	205.701	428.438	291.58	1.48e-11	5.93e-11	3.93e-12	9.28e-11	0.0554828	0.0264336	0.00132278	0.00243209	protein_coding	951
EPAS1	ENSG00000116016	2704.05	2999.32	11817.3	1.49e-11	5.98e-11	0.133173	0.109241	1.6e-11	9.05e-10	2.67e-10	2.17e-08	protein_coding	2034
SNAPC1	ENSG00000023608	379.66	488.804	765.273	1.5e-11	5.98e-11	2.14e-05	7.4e-05	2.41e-09	1.96e-08	1.35e-06	7.36e-06	protein_coding	6617
LY96	ENSG00000154589	108.77	238.309	168.61	1.51e-11	6.04e-11	9.73e-12	2.01e-10	0.0104026	0.00632045	0.00170832	0.00298911	protein_coding	23643
C16orf74	ENSG00000154102	51.3232	48.6677	525.047	1.52e-11	6.04e-11	0.940282	0.417557	6.16e-12	9.05e-10	1.52e-10	2.17e-08	protein_coding	404550
RPS6	ENSG00000137154	46989.1	82393.6	76820.1	1.52e-11	6.04e-11	8.05e-12	1.71e-10	0.00127168	0.00103806	0.268099	0.173626	protein_coding	6194
SF1	ENSG00000168066	3789.18	4351.82	5840	1.52e-11	6.05e-11	1.95e-05	6.82e-05	3.45e-09	2.58e-08	7.21e-07	4.38e-06	protein_coding	7536
NPIPB11	ENSG00000254206	59.7189	51.0355	194.683	1.53e-11	6.08e-11	0.133173	0.109241	2e-11	9.73e-10	2.1e-10	2.17e-08	protein_coding	728888
PRRC2A	ENSG00000231825	257.853	750.04	664.695	1.53e-11	6.08e-11	2.6e-11	4.91e-10	0.000448303	0.00042402	0.0591604	0.0547784	protein_coding	7916
NR2F2	ENSG00000185551	1867.62	1351.51	6441.73	1.56e-11	6.16e-11	0.00874093	0.0126488	1.78e-10	3.24e-09	6.38e-10	2.63e-08	protein_coding	100302258
NR2F2	ENSG00000185551	1867.62	1351.51	6441.73	1.56e-11	6.16e-11	0.00874093	0.0126488	1.78e-10	3.24e-09	6.38e-10	2.63e-08	protein_coding	7026
DAGLB	ENSG00000164535	449.504	448.024	1173.6	1.58e-11	6.25e-11	0.790541	0.376677	7.74e-12	9.05e-10	1.19e-10	2.17e-08	protein_coding	221955
NOV	ENSG00000136999	253.138	699.845	706.174	1.59e-11	6.27e-11	1.47e-10	2.19e-09	2.03e-05	3.05e-05	0.76177	0.353981	protein_coding	4856
HAS3	ENSG00000103044	284.298	-7.47805	195.128	1.59e-11	6.28e-11	1.64e-12	4.24e-11	0.0571706	0.0271152	0.0150387	0.0181374	protein_coding	3038
RAB2A	ENSG00000104388	4364.9	5697.84	10087.1	1.6e-11	6.3e-11	1.55e-05	5.58e-05	3.19e-09	2.44e-08	1.96e-06	1.01e-05	protein_coding	5862
VRK3	ENSG00000105053	652.537	907.851	1120.22	1.6e-11	6.31e-11	7.23e-09	6.76e-08	5.73e-07	1.54e-06	0.0131037	0.0161569	protein_coding	51231
IFRD2	ENSG00000214706	938.027	1500.94	1418.58	1.62e-11	6.36e-11	9.96e-12	2.04e-10	0.001301	0.0010588	0.163908	0.120973	protein_coding	7866
YRDC	ENSG00000196449	457.91	646.52	800.15	1.63e-11	6.41e-11	9.59e-09	8.66e-08	4.67e-07	1.3e-06	0.00988204	0.0128265	protein_coding	79693
FRA10AC1	ENSG00000148690	399.476	548.692	707.318	1.64e-11	6.42e-11	2.74e-08	2.19e-07	1.77e-07	5.84e-07	0.00526618	0.007645	protein_coding	118924
PLBD2	ENSG00000151176	1352.16	1114.89	2625.65	1.65e-11	6.46e-11	0.00451194	0.00730992	5.78e-10	7.01e-09	3.98e-10	2.21e-08	protein_coding	196463
ZDHHC7	ENSG00000153786	1537.83	1105.31	3813.15	1.67e-11	6.52e-11	0.000488561	0.00112397	2.41e-09	1.96e-08	2.37e-09	5.7e-08	protein_coding	55625
SLC25A29	ENSG00000197119	2259.97	2075.48	9269.21	1.67e-11	6.54e-11	0.978267	0.426974	8.48e-12	9.05e-10	1.1e-10	2.17e-08	protein_coding	123096
UBAC2	ENSG00000134882	1725.26	2100.37	3695.57	1.68e-11	6.56e-11	0.000298787	0.000736347	4.9e-10	6.22e-09	1.14e-07	9.9e-07	protein_coding	337867
SYDE2	ENSG00000097096	276.568	169.182	112.676	1.69e-11	6.57e-11	1.81e-08	1.53e-07	1.59e-07	5.31e-07	0.0298862	0.0319219	protein_coding	84144
MGLL	ENSG00000074416	1695.64	1576.44	9367.05	1.69e-11	6.57e-11	0.728341	0.357396	8.87e-12	9.05e-10	1.19e-10	2.17e-08	protein_coding	11343
HMGXB4	ENSG00000100281	612.883	798.629	1055.24	1.71e-11	6.65e-11	4.92e-07	2.76e-06	3.21e-08	1.44e-07	9.46e-05	0.000257225	protein_coding	10042
MINOS1	ENSG00000173436	1178.42	1694.21	1717.02	1.72e-11	6.68e-11	1.23e-11	2.46e-10	0.000558392	0.000510771	0.790212	0.361862	protein_coding	440574
CCL4L2	ENSG00000275313	42.3011	106.797	5.55265	1.74e-11	6.73e-11	1.64e-10	2.4e-09	0.156094	0.0632242	9.33e-08	8.4e-07	protein_coding	9560
CCL4L2	ENSG00000275313	42.3011	106.797	5.55265	1.74e-11	6.73e-11	1.64e-10	2.4e-09	0.156094	0.0632242	9.33e-08	8.4e-07	protein_coding	388372
PBX2	ENSG00000237344	170.838	602.293	606.528	1.74e-11	6.74e-11	1.12e-11	2.27e-10	0.000614993	0.000554492	0.857608	0.3797	protein_coding	5089
TPCN1	ENSG00000186815	1198.45	1302.52	3430.42	1.75e-11	6.76e-11	0.259688	0.177986	9.72e-12	9.05e-10	3.67e-10	2.17e-08	protein_coding	53373
SNX1	ENSG00000028528	2079.64	2440.13	3562.96	1.78e-11	6.88e-11	9.26e-05	0.000265885	8.39e-10	9.21e-09	7.21e-07	4.38e-06	protein_coding	6642
	ENSG00000230715	32.2073	23.8054	65.7694	1.78e-11	6.88e-11	0.000327504	0.000798722	4.92e-09	3.4e-08	2.03e-09	5.15e-08	processed_pseudogene
NEU1	ENSG00000227129	269.305	315.945	699.708	1.8e-11	6.92e-11	0.00706994	0.0106206	1.16e-10	2.44e-09	2.37e-09	5.7e-08	protein_coding	4758
BICDL1	ENSG00000135127	521.909	320.963	1755.72	1.8e-11	6.92e-11	0.00196581	0.0036744	1.03e-09	1.06e-08	8.72e-10	3.16e-08	protein_coding	92558
SPPL3	ENSG00000157837	1359.08	1762.12	2388.17	1.8e-11	6.92e-11	3.95e-06	1.67e-05	6.23e-09	4.06e-08	2.26e-05	7.69e-05	protein_coding	121665
RBPMS	ENSG00000157110	804.131	804.091	3756.99	1.8e-11	6.92e-11	0.419644	0.248794	1.4e-11	9.05e-10	1.01e-10	2.17e-08	protein_coding	11030
VAMP5	ENSG00000168899	227.088	380.874	435.455	1.82e-11	7e-11	5.86e-10	7.39e-09	5.56e-06	1.03e-05	0.232451	0.15689	protein_coding	10791
	ENSG00000260855	30.6258	32.2892	195.994	1.83e-11	7e-11	0.546692	0.296652	5.62e-12	9.05e-10	3.98e-10	2.21e-08	antisense
ANXA5	ENSG00000164111	4689.2	6329.65	8972.98	1.84e-11	7.06e-11	1.22e-06	6.08e-06	1.16e-08	6.5e-08	0.000134917	0.000346735	protein_coding	308
ADSL	ENSG00000239900	1181.5	1647.07	2039.14	1.86e-11	7.13e-11	2.99e-09	3.1e-08	1.28e-06	2.99e-06	0.0498508	0.0479655	protein_coding	158
KCNJ1	ENSG00000151704	13.0743	2.76253	40.0621	1.87e-11	7.13e-11	2.58e-07	1.56e-06	4.2e-06	8.14e-06	7.09e-08	6.73e-07	protein_coding	3758
CCNK	ENSG00000090061	1031.7	1328.95	1669.71	1.87e-11	7.15e-11	3.88e-08	2.97e-07	1.83e-07	6e-07	0.00258669	0.00421479	protein_coding	8812
PRRC2A	ENSG00000206427	258.315	749.358	678.544	1.88e-11	7.15e-11	3.06e-11	5.7e-10	0.000448303	0.00042402	0.0757931	0.0664909	protein_coding	7916
MED25	ENSG00000104973	1128.24	1491.29	2226.49	1.88e-11	7.17e-11	3.7e-06	1.58e-05	1.4e-08	7.49e-08	3.59e-06	1.66e-05	protein_coding	81857
MED25	ENSG00000104973	1128.24	1491.29	2226.49	1.88e-11	7.17e-11	3.7e-06	1.58e-05	1.4e-08	7.49e-08	3.59e-06	1.66e-05	protein_coding	102465480
WHAMMP3	ENSG00000276141	83.102	85.0331	219.121	1.88e-11	7.17e-11	0.670361	0.338619	8.87e-12	9.05e-10	1.65e-10	2.17e-08	transcribed_unprocessed_pseudogene
SLC30A5	ENSG00000145740	1446.23	1767.24	2535.35	1.89e-11	7.17e-11	3.95e-05	0.000127436	1.07e-09	1.08e-08	4.29e-06	1.93e-05	protein_coding	64924
CDK5	ENSG00000164885	285.278	470.36	427.702	1.89e-11	7.19e-11	9.28e-12	1.94e-10	0.00163048	0.00128823	0.21366	0.14766	protein_coding	1020
PLXNB2	ENSG00000196576	7791.3	9012.12	21898.9	1.91e-11	7.23e-11	0.0151854	0.0200033	9.34e-11	2.12e-09	8.72e-10	3.16e-08	protein_coding	23654
C1QL1	ENSG00000131094	57.6376	344.718	-184.389	1.91e-11	7.23e-11	7.14e-11	1.18e-09	0.0167472	0.00947993	8.65e-06	3.45e-05	protein_coding	10882
PFDN6	ENSG00000224782	143.239	226.421	277.846	1.95e-11	7.38e-11	4.93e-10	6.35e-09	7.56e-06	1.33e-05	0.227647	0.154661	protein_coding	102465501
PFDN6	ENSG00000224782	143.239	226.421	277.846	1.95e-11	7.38e-11	4.93e-10	6.35e-09	7.56e-06	1.33e-05	0.227647	0.154661	protein_coding	10471
	ENSG00000260121	32.1084	20.6686	79.921	1.95e-11	7.38e-11	0.000514042	0.00117584	7.86e-09	4.84e-08	5.9e-10	2.55e-08	antisense
TAF10	ENSG00000166337	920.708	1257.11	1489.42	1.96e-11	7.38e-11	2.74e-08	2.19e-07	2.34e-07	7.37e-07	0.00469269	0.006922	protein_coding	6881
OSCAR	ENSG00000275736	27.1549	76.9857	14.7301	1.96e-11	7.38e-11	4.87e-12	1.12e-10	0.633266	0.198589	6.59e-05	0.000190152	protein_coding	126014
CAP2	ENSG00000112186	323.035	602.16	693.032	1.96e-11	7.38e-11	1.88e-10	2.71e-09	2.15e-05	3.2e-05	0.446665	0.249957	protein_coding	10486
MAB21L2	ENSG00000181541	9.63241	80.5899	41.4395	1.96e-11	7.38e-11	1.07e-11	2.17e-10	0.00667818	0.00431565	0.00766351	0.010449	protein_coding	10586
USP21	ENSG00000143258	538.192	856.026	892.277	1.96e-11	7.38e-11	5.04e-10	6.47e-09	6.1e-06	1.11e-05	0.548421	0.288139	protein_coding	27005
SF3A1	ENSG00000099995	2242.9	2802.07	3834.09	1.97e-11	7.38e-11	2.25e-06	1.03e-05	1.57e-08	8.14e-08	1.29e-05	4.84e-05	protein_coding	10291
	ENSG00000280020	16.7874	19.5286	61.7835	1.97e-11	7.38e-11	0.12969	0.107068	1.75e-11	9.31e-10	5.04e-10	2.42e-08	TEC
LINC01341	ENSG00000227953	44.3861	41.1705	309.745	1.98e-11	7.43e-11	0.638411	0.32794	6.45e-12	9.05e-10	3.39e-10	2.17e-08	processed_transcript
SURF1	ENSG00000148290	549.535	798.224	956.216	1.99e-11	7.43e-11	2.59e-09	2.74e-08	1.36e-06	3.16e-06	0.0936119	0.0785171	protein_coding	6834
FAM151B	ENSG00000152380	41.5917	35.4127	136.304	1.99e-11	7.44e-11	0.155614	0.122618	2.09e-11	9.87e-10	2.89e-10	2.17e-08	protein_coding	167555
	ENSG00000273055	13.4826	11.5271	100.035	1.99e-11	7.44e-11	0.433509	0.254333	7.39e-12	9.05e-10	3.98e-10	2.21e-08	antisense
IGHV5-51	ENSG00000211966	602.164	4829.41	2367.29	2e-11	7.45e-11	6.19e-12	1.36e-10	0.0262649	0.0139413	0.00329518	0.00515003	IG_V_gene
LRRC23	ENSG00000010626	556.514	27.6994	270.635	2.01e-11	7.5e-11	1.6e-11	3.1e-10	0.00604813	0.00396736	0.00269415	0.00435921	protein_coding	10233
ELOVL7	ENSG00000164181	352.474	391.573	1642.36	2.03e-11	7.54e-11	0.201616	0.148207	1.53e-11	9.05e-10	3.39e-10	2.17e-08	protein_coding	79993
EEF1B2	ENSG00000114942	9840.33	15295.2	15921.4	2.04e-11	7.58e-11	9.5e-12	1.98e-10	0.000987049	0.000835051	0.771217	0.356672	protein_coding	1933
BRD1	ENSG00000100425	819.868	930.365	1772.26	2.06e-11	7.63e-11	0.0160624	0.0209207	5.07e-11	1.48e-09	3.72e-09	7.63e-08	protein_coding	23774
DGCR6	ENSG00000183628	65.8198	90.5684	552.692	2.08e-11	7.7e-11	0.225413	0.160737	8.87e-12	9.05e-10	8.72e-10	3.16e-08	protein_coding	8214
	ENSG00000261104	40.7266	5.88661	-9.66738	2.08e-11	7.7e-11	1.17e-08	1.04e-07	1.07e-07	3.83e-07	0.507974	0.273098	lincRNA
AMDHD1	ENSG00000139344	51.9765	43.7606	163.938	2.11e-11	7.8e-11	0.102152	0.089211	3.41e-11	1.22e-09	2.89e-10	2.17e-08	protein_coding	144193
GOLGA6L4	ENSG00000184206	63.8955	55.105	185.626	2.11e-11	7.8e-11	0.117254	0.0989238	2.99e-11	1.16e-09	2.89e-10	2.17e-08	protein_coding	643707
UTP18	ENSG00000011260	931.097	1210.31	1646.16	2.13e-11	7.87e-11	8.81e-08	6.1e-07	1.15e-07	4.04e-07	0.00116173	0.00217835	protein_coding	51096
BATF3	ENSG00000123685	59.1952	16.8275	191.738	2.16e-11	7.97e-11	3.07e-05	0.000102027	7.76e-08	2.91e-07	4.32e-09	8.5e-08	protein_coding	55509
LYPLA1	ENSG00000120992	2667.85	3807.74	5014.14	2.17e-11	8e-11	6.02e-09	5.73e-08	9.17e-07	2.26e-06	0.0210154	0.0239902	protein_coding	10434
WSB1	ENSG00000109046	2123.94	1971.14	7625.17	2.17e-11	8e-11	0.670361	0.338619	1.46e-11	9.05e-10	1.01e-10	2.17e-08	protein_coding	26118
LINC01088	ENSG00000249307	10.864	13.6637	42.0428	2.18e-11	8.03e-11	0.015473	0.0203126	4.65e-11	1.4e-09	5.82e-09	1.03e-07	antisense
MTF1	ENSG00000188786	706.621	718.269	1930.64	2.2e-11	8.08e-11	0.383351	0.233613	1.46e-11	9.05e-10	1.79e-10	2.17e-08	protein_coding	4520
KTI12	ENSG00000198841	212.283	238.667	390.214	2.24e-11	8.22e-11	0.00359735	0.00603765	1.63e-10	3.06e-09	9.74e-09	1.49e-07	protein_coding	112970
NIP7	ENSG00000132603	578.558	754.413	1146.4	2.24e-11	8.22e-11	3.03e-07	1.8e-06	8.65e-08	3.19e-07	6.59e-05	0.000190152	protein_coding	51388
H19	ENSG00000130600	12653.3	46034.4	49318.4	2.26e-11	8.26e-11	9.59e-11	1.52e-09	5.83e-05	7.42e-05	0.945741	0.40245	processed_transcript	283120
H19	ENSG00000130600	12653.3	46034.4	49318.4	2.26e-11	8.26e-11	9.59e-11	1.52e-09	5.83e-05	7.42e-05	0.945741	0.40245	processed_transcript	100033819
H19	ENSG00000130600	12653.3	46034.4	49318.4	2.26e-11	8.26e-11	9.59e-11	1.52e-09	5.83e-05	7.42e-05	0.945741	0.40245	processed_transcript	102724852
UBALD2	ENSG00000185262	922.641	1224.4	2110.4	2.27e-11	8.29e-11	2.69e-05	9.07e-05	2.72e-09	2.14e-08	2.21e-06	1.11e-05	protein_coding	283991
CLDN1	ENSG00000163347	1979.33	6145.49	13535.3	2.27e-11	8.29e-11	3.53e-08	2.73e-07	3.55e-07	1.04e-06	0.00101898	0.00195297	protein_coding	9076
TMEM101	ENSG00000091947	1330.73	1089.32	8431.96	2.28e-11	8.31e-11	0.175328	0.133854	1.46e-11	9.05e-10	5.9e-10	2.55e-08	protein_coding	84336
CTLA4	ENSG00000163599	54.8007	9.00608	7.38999	2.28e-11	8.31e-11	1.07e-09	1.26e-08	2.29e-06	4.89e-06	0.103705	0.08496	protein_coding	1493
SCARB1	ENSG00000073060	781.392	989.748	1908.39	2.3e-11	8.36e-11	0.000899868	0.00188821	3.81e-10	5.25e-09	3.79e-08	4.2e-07	protein_coding	949
HN1L	ENSG00000206053	4309.3	3678.98	11534.2	2.31e-11	8.38e-11	0.107251	0.0925964	3.73e-11	1.29e-09	2.89e-10	2.17e-08	protein_coding	90861
CDIP1	ENSG00000089486	370.272	526.495	1005	2.31e-11	8.39e-11	4.32e-05	0.00013713	3.45e-09	2.58e-08	3.55e-07	2.46e-06	protein_coding	29965
ARHGAP1	ENSG00000175220	2472.64	2541.01	6494.57	2.32e-11	8.41e-11	0.738597	0.360571	6.75e-12	9.05e-10	4.3e-10	2.24e-08	protein_coding	392
UFD1L	ENSG00000070010	871.694	1272.92	1582.01	2.32e-11	8.42e-11	5.22e-09	5.05e-08	8.03e-07	2.03e-06	0.0718002	0.0637793	protein_coding	7353
ZCCHC12	ENSG00000174460	310.529	-58.2254	-22.4235	2.36e-11	8.56e-11	3.76e-09	3.77e-08	3.09e-07	9.27e-07	0.106359	0.0866591	protein_coding	170261
MYD88	ENSG00000172936	1069.82	1431.87	2068.03	2.37e-11	8.56e-11	3.9e-07	2.25e-06	3.87e-08	1.67e-07	0.000374462	0.000826228	protein_coding	4615
SERPINI1	ENSG00000163536	256.266	37.5679	128.933	2.38e-11	8.59e-11	1.29e-11	2.56e-10	0.00474886	0.00323462	0.0166511	0.0197276	protein_coding	5274
PMP22	ENSG00000109099	637.992	1087.1	1383.88	2.39e-11	8.61e-11	1.09e-09	1.28e-08	4.76e-06	9.02e-06	0.101104	0.0832932	protein_coding	5376
	ENSG00000278987	14.6687	15.4896	57.666	2.39e-11	8.61e-11	0.822178	0.385769	8.1e-12	9.05e-10	3.13e-10	2.17e-08	TEC
USP48	ENSG00000090686	1486.54	1959.62	2496.77	2.39e-11	8.62e-11	1.41e-07	9.2e-07	8.97e-08	3.29e-07	0.000853824	0.00167988	protein_coding	84196
ARHGAP33	ENSG00000004777	136.472	269.848	285.243	2.41e-11	8.65e-11	1e-10	1.58e-09	6.33e-05	7.96e-05	0.752359	0.351441	protein_coding	115703
TMEM14C	ENSG00000111843	2560.13	4106.96	4342.95	2.41e-11	8.65e-11	1.37e-10	2.07e-09	4.05e-05	5.45e-05	0.935896	0.400117	protein_coding	51522
HSP90B1	ENSG00000166598	32894.6	15437.6	35548.7	2.41e-11	8.66e-11	2.43e-11	4.6e-10	0.500809	0.164784	4.04e-06	1.83e-05	protein_coding	100500842
HSP90B1	ENSG00000166598	32894.6	15437.6	35548.7	2.41e-11	8.66e-11	2.43e-11	4.6e-10	0.500809	0.164784	4.04e-06	1.83e-05	protein_coding	7184
ZHX3	ENSG00000174306	947.769	882.379	4421.57	2.44e-11	8.73e-11	0.331803	0.211009	1.33e-11	9.05e-10	3.39e-10	2.17e-08	protein_coding	23051
LRRC55	ENSG00000183908	137.559	482.819	304.282	2.44e-11	8.73e-11	8.24e-12	1.74e-10	0.00796252	0.00501857	0.0255183	0.0281055	protein_coding	219527
RAPH1	ENSG00000173166	825.56	766.799	2764.23	2.44e-11	8.73e-11	0.162672	0.126777	1.28e-11	9.05e-10	9.43e-10	3.32e-08	protein_coding	65059
SOX18	ENSG00000203883	180.299	430.845	444.707	2.46e-11	8.79e-11	4.63e-11	8.13e-10	0.000194871	0.000207868	0.565034	0.293703	protein_coding	54345
TMEM184A	ENSG00000164855	668.675	541.042	2010.16	2.5e-11	8.9e-11	0.0356388	0.0395021	6.31e-11	1.72e-09	8.72e-10	3.16e-08	protein_coding	202915
ATP11A	ENSG00000068650	1977.71	2107.53	13104.9	2.52e-11	8.97e-11	0.347298	0.218052	1.67e-11	9.13e-10	2.27e-10	2.17e-08	protein_coding	23250
TM6SF1	ENSG00000136404	75.2273	162.484	148.412	2.55e-11	9.06e-11	6.38e-11	1.07e-09	0.000150081	0.000165912	0.376305	0.222064	protein_coding	53346
PSMG2	ENSG00000128789	1061.1	1464.06	1865.07	2.58e-11	9.17e-11	1.24e-08	1.1e-07	4.83e-07	1.34e-06	0.0239324	0.0266663	protein_coding	56984
IFNGR2	ENSG00000159128	392.536	563.257	933.199	2.58e-11	9.17e-11	7.42e-06	2.9e-05	7.56e-09	4.73e-08	8.17e-06	3.29e-05	protein_coding	3460
SGK2	ENSG00000101049	112.251	101.321	844.992	2.61e-11	9.25e-11	0.687819	0.344256	8.48e-12	9.05e-10	3.98e-10	2.21e-08	protein_coding	10110
	ENSG00000261732	47.5435	48.9191	135.02	2.62e-11	9.28e-11	0.718134	0.354049	9.29e-12	9.05e-10	3.39e-10	2.17e-08	protein_coding
	ENSG00000279789	34.3553	27.9849	100.634	2.63e-11	9.29e-11	0.0721835	0.0684792	5.79e-11	1.62e-09	3.67e-10	2.17e-08	TEC
KLF10	ENSG00000155090	1443.31	2271.28	3269.92	2.67e-11	9.44e-11	4.89e-08	3.64e-07	2.51e-07	7.84e-07	0.00193764	0.00331094	protein_coding	7071
	ENSG00000273771	4.59242	6.06783	25.0195	2.67e-11	9.44e-11	0.160631	0.125614	1.33e-11	9.05e-10	1.39e-09	4.2e-08	lincRNA
NEU1	ENSG00000184494	269.831	325.08	685.675	2.69e-11	9.5e-11	0.00470839	0.00758094	1.71e-10	3.15e-09	8.41e-09	1.36e-07	protein_coding	4758
SLC16A4	ENSG00000168679	304.325	230.787	1788.44	2.75e-11	9.68e-11	0.216423	0.156108	2.39e-11	1.06e-09	3.13e-10	2.17e-08	protein_coding	9122
LTC4S	ENSG00000213316	47.6543	150.174	104.052	2.8e-11	9.87e-11	3.31e-12	7.97e-11	0.0210413	0.0115028	0.0718002	0.0637793	protein_coding	4056
SCAF1	ENSG00000126461	1499.25	1745.56	2863.5	2.88e-11	1.01e-10	0.00329582	0.0056268	1.94e-10	3.39e-09	1.74e-08	2.28e-07	protein_coding	58506
EVI2B	ENSG00000185862	279.708	542.805	564.003	2.88e-11	1.01e-10	9.37e-11	1.5e-09	9.8e-05	0.000115481	0.532053	0.282034	protein_coding	2124
DTNBP1	ENSG00000047579	330.034	520.217	565.208	2.9e-11	1.02e-10	2.1e-10	2.99e-09	3.13e-05	4.42e-05	0.678493	0.32922	protein_coding	84062
TMC4	ENSG00000274384	179.034	577.022	411.695	2.91e-11	1.02e-10	1.56e-11	3.03e-10	0.00370757	0.00261191	0.0318054	0.0335502	protein_coding	147798
CCL3	ENSG00000277632	187.088	489.808	202.705	2.92e-11	1.02e-10	4.76e-12	1.1e-10	0.719232	0.219255	0.000210606	0.000506682	protein_coding	6348
EGR3	ENSG00000179388	316.872	1042.64	-174.255	2.92e-11	1.02e-10	4.53e-11	7.96e-10	0.0514441	0.024765	1.62e-05	5.82e-05	protein_coding	1960
DLX3	ENSG00000064195	198.488	-20.3642	108.637	2.93e-11	1.02e-10	1.85e-12	4.73e-11	0.067234	0.0310579	0.0430618	0.042729	protein_coding	1747
SEC23IP	ENSG00000107651	1389.5	1760.14	2516.72	2.95e-11	1.03e-10	3.19e-06	1.39e-05	3.09e-08	1.4e-07	3e-06	1.43e-05	protein_coding	11196
IGLL5	ENSG00000254709	4373.84	13945.4	-12721.9	2.96e-11	1.03e-10	4.62e-10	5.99e-09	0.000358745	0.000350387	3.68e-05	0.000115956	protein_coding	100423062
TMEM253	ENSG00000232070	6.06297	28.1029	25.7417	2.97e-11	1.03e-10	4.96e-11	8.61e-10	0.000245653	0.000252809	0.492244	0.267028	protein_coding	643382
	ENSG00000228748	100.076	20.9315	62.1554	2.99e-11	1.04e-10	7.32e-12	1.57e-10	0.0203239	0.0111704	0.0118003	0.0148624	antisense
OSCAR	ENSG00000170909	26.1607	67.7639	27.6713	3.03e-11	1.05e-10	3.65e-12	8.67e-11	0.921899	0.263934	0.000324917	0.000730657	protein_coding	126014
HDAC1	ENSG00000116478	2465.06	3060.36	4395.47	3.05e-11	1.06e-10	1.6e-05	5.72e-05	5.12e-09	3.53e-08	4.83e-06	2.13e-05	protein_coding	3065
TMBIM4	ENSG00000155957	1384.5	2020.62	2940.49	3.07e-11	1.06e-10	3.5e-07	2.04e-06	5.19e-08	2.11e-07	0.00059536	0.00122931	protein_coding	51643
CCL4L2	ENSG00000276125	23.5911	60.0203	3.06182	3.08e-11	1.06e-10	2.85e-10	3.93e-09	0.165853	0.0665711	1.07e-07	9.36e-07	protein_coding	9560
MDC1	ENSG00000231135	18.1174	48.5818	56.9373	3.08e-11	1.06e-10	6.23e-11	1.06e-09	0.000166688	0.000181565	0.818935	0.369338	protein_coding	9656
MPC1	ENSG00000060762	502.587	534.374	1470.27	3.11e-11	1.07e-10	0.165769	0.128618	3.12e-11	1.16e-09	3.67e-10	2.17e-08	protein_coding	51660
MAPK14	ENSG00000112062	1861.42	2147.79	3924.49	3.11e-11	1.07e-10	0.00664832	0.010112	1.38e-10	2.67e-09	9.74e-09	1.49e-07	protein_coding	1432
IGLV2-14	ENSG00000211666	1338.33	3874.39	-1889.21	3.16e-11	1.09e-10	1.44e-09	1.64e-08	0.00038655	0.000373148	6.86e-06	2.86e-05	IG_V_gene
TSPAN12	ENSG00000106025	1110.28	2832.14	2958.68	3.18e-11	1.09e-10	2.73e-10	3.77e-09	2.56e-05	3.71e-05	0.678493	0.32922	protein_coding	23554
TIMM17B	ENSG00000126768	662.196	1018.73	1254.08	3.2e-11	1.1e-10	5.55e-09	5.32e-08	1.16e-06	2.75e-06	0.0737746	0.0651396	protein_coding	10245
SH3GL1	ENSG00000141985	1391.59	1629.58	2695.8	3.25e-11	1.11e-10	0.00336896	0.00572324	1.26e-10	2.55e-09	6.18e-08	6.1e-07	protein_coding	6455
RAB11FIP3	ENSG00000275338	145.005	134.389	612.67	3.27e-11	1.12e-10	0.431512	0.25361	1.28e-11	9.05e-10	5.45e-10	2.53e-08	protein_coding	9727
ZC3HAV1	ENSG00000105939	1734.92	1677.64	3561.52	3.33e-11	1.14e-10	0.404123	0.242416	1.75e-11	9.31e-10	3.67e-10	2.17e-08	protein_coding	56829
C1orf54	ENSG00000118292	112.563	198.656	197.536	3.35e-11	1.14e-10	6.83e-11	1.14e-09	0.000166688	0.000181565	0.838223	0.374988	protein_coding	79630
NELFE	ENSG00000229363	178.382	285.604	298.616	3.37e-11	1.15e-10	6.09e-11	1.04e-09	0.000210586	0.000222003	0.633797	0.31526	protein_coding	100302242
NELFE	ENSG00000229363	178.382	285.604	298.616	3.37e-11	1.15e-10	6.09e-11	1.04e-09	0.000210586	0.000222003	0.633797	0.31526	protein_coding	7936
KLK14	ENSG00000129437	77.5499	6.44054	-19.1694	3.41e-11	1.16e-10	2.63e-08	2.12e-07	4.48e-08	1.88e-07	0.92606	0.397618	protein_coding	43847
HSPA5	ENSG00000044574	17185.3	12401.6	24391.7	3.47e-11	1.18e-10	7.64e-07	4.03e-06	1.47e-05	2.32e-05	7.82e-09	1.3e-07	protein_coding	3309
	ENSG00000232759	7.41389	9.02083	41.9197	3.47e-11	1.18e-10	0.147835	0.117958	2.61e-11	1.1e-09	8.72e-10	3.16e-08	antisense	100506178
LMAN2	ENSG00000169223	3866.7	4384.3	12439.6	3.5e-11	1.19e-10	0.0783228	0.0728661	4.65e-11	1.4e-09	8.72e-10	3.16e-08	protein_coding	10960
LPIN3	ENSG00000132793	557.403	494.78	1707.85	3.53e-11	1.2e-10	0.201616	0.148207	2.61e-11	1.1e-09	5.45e-10	2.53e-08	protein_coding	64900
SKI	ENSG00000157933	1810.84	2588.29	3348.56	3.54e-11	1.2e-10	1.06e-07	7.19e-07	1.77e-07	5.84e-07	0.00132278	0.00243209	protein_coding	6497
ELMSAN1	ENSG00000156030	1264.24	1152.93	2275.39	3.54e-11	1.2e-10	0.0380995	0.0416346	1.38e-10	2.67e-09	5.45e-10	2.53e-08	protein_coding	91748
KRI1	ENSG00000129347	740.159	1212.03	1218.08	3.62e-11	1.23e-10	8.18e-11	1.33e-09	0.00020522	0.000217303	0.257551	0.168693	protein_coding	65095
	ENSG00000269958	46.0777	41.2877	115.041	3.62e-11	1.23e-10	0.268424	0.182376	2.86e-11	1.14e-09	3.39e-10	2.17e-08	sense_intronic
FLYWCH2	ENSG00000162076	523.53	410.828	1301.86	3.63e-11	1.23e-10	0.091221	0.0819261	7.85e-11	1.93e-09	3.39e-10	2.17e-08	protein_coding	114984
INO80E	ENSG00000169592	722.065	742.379	1556.5	3.66e-11	1.24e-10	0.292701	0.193685	2.5e-11	1.07e-09	3.67e-10	2.17e-08	protein_coding	283899
FLYWCH1	ENSG00000059122	614.322	542.587	1427.18	3.77e-11	1.27e-10	0.11646	0.0984348	7.2e-11	1.83e-09	2.89e-10	2.17e-08	protein_coding	84256
JMY	ENSG00000152409	1114.18	1138.07	2680.36	3.77e-11	1.27e-10	0.685314	0.343521	1.53e-11	9.05e-10	3.67e-10	2.17e-08	protein_coding	133746
CKS2	ENSG00000123975	1042.12	1741.67	1972.01	3.79e-11	1.27e-10	3.26e-10	4.41e-09	2.64e-05	3.8e-05	0.733647	0.345962	protein_coding	1164
EVC	ENSG00000072840	831.97	606.054	1893.79	3.8e-11	1.27e-10	0.000677775	0.00149115	7.86e-09	4.84e-08	1.62e-09	4.54e-08	protein_coding	2121
AATF	ENSG00000276072	987.338	1389.23	1608.86	3.81e-11	1.28e-10	1.21e-09	1.41e-08	6.1e-06	1.11e-05	0.301506	0.189268	protein_coding	26574
IGFBP7	ENSG00000163453	9027.73	9828.18	31152.2	3.83e-11	1.28e-10	0.511047	0.2835	1.67e-11	9.13e-10	4.3e-10	2.24e-08	protein_coding	3490
NACAD	ENSG00000136274	103.57	221.485	250.363	3.87e-11	1.3e-10	6.39e-10	7.97e-09	1.16e-05	1.9e-05	0.696704	0.33516	protein_coding	23148
WDR91	ENSG00000105875	1258.64	1238.64	4421.67	3.9e-11	1.3e-10	0.961977	0.423379	2.09e-11	9.87e-10	1.94e-10	2.17e-08	protein_coding	29062
TMEM199	ENSG00000244045	534.357	773.114	922.531	3.92e-11	1.31e-10	1.97e-09	2.17e-08	4.76e-06	9.02e-06	0.0985554	0.0816873	protein_coding	147007
TMEM199	ENSG00000244045	534.357	773.114	922.531	3.92e-11	1.31e-10	1.97e-09	2.17e-08	4.76e-06	9.02e-06	0.0985554	0.0816873	protein_coding	100616388
FOXO1	ENSG00000150907	1295.25	1247.67	4110.12	3.95e-11	1.32e-10	0.54896	0.297279	1.67e-11	9.13e-10	4.3e-10	2.24e-08	protein_coding	2308
PFDN6	ENSG00000206283	150.337	235.485	289.162	3.95e-11	1.32e-10	1.24e-09	1.43e-08	6.29e-06	1.14e-05	0.295754	0.186681	protein_coding	10471
PFDN6	ENSG00000206283	150.337	235.485	289.162	3.95e-11	1.32e-10	1.24e-09	1.43e-08	6.29e-06	1.14e-05	0.295754	0.186681	protein_coding	102465501
	ENSG00000278134	11.5777	8.66766	65.6968	3.97e-11	1.32e-10	0.102152	0.089211	3.57e-11	1.27e-09	1.19e-09	3.79e-08	unprocessed_pseudogene
THOC3	ENSG00000051596	1244.82	1957.08	2450.95	4.04e-11	1.35e-10	5.22e-09	5.05e-08	2.29e-06	4.89e-06	0.0280674	0.0303395	protein_coding	84321
SMG1P7	ENSG00000261556	98.781	86.5855	305.612	4.07e-11	1.35e-10	0.308601	0.20097	4.25e-11	1.39e-09	1.94e-10	2.17e-08	transcribed_unprocessed_pseudogene	100506060
CNOT3	ENSG00000088038	694.217	929.976	1172.96	4.08e-11	1.35e-10	3.53e-08	2.73e-07	4.07e-07	1.16e-06	0.007386	0.0101303	protein_coding	4849
MGRN1	ENSG00000102858	1438.4	1461.79	2828.14	4.09e-11	1.35e-10	0.46826	0.267955	2.39e-11	1.06e-09	2.89e-10	2.17e-08	protein_coding	23295
BASP1P1	ENSG00000230535	91.0036	60.2889	516.297	4.09e-11	1.35e-10	0.0674586	0.0649383	8.94e-11	2.07e-09	5.9e-10	2.55e-08	processed_pseudogene
HECTD3	ENSG00000126107	821.328	934.224	1452.28	4.1e-11	1.35e-10	0.0011598	0.00234119	9.89e-10	1.03e-08	1.3e-08	1.84e-07	protein_coding	79654
MAPK8IP3	ENSG00000138834	1151.07	1031.73	4620.22	4.12e-11	1.36e-10	0.700393	0.348681	2.61e-11	1.1e-09	1.79e-10	2.17e-08	protein_coding	23162
TRIOBP	ENSG00000100106	1312.68	1439.01	2896.28	4.18e-11	1.38e-10	0.0738174	0.0696582	4.65e-11	1.4e-09	1.62e-09	4.54e-08	protein_coding	11078
SHISA2	ENSG00000180730	286.592	-50.825	-9.69217	4.19e-11	1.38e-10	7.14e-11	1.18e-09	0.000278986	0.00028305	0.369667	0.219306	protein_coding	387914
LRP11	ENSG00000120256	886.049	653.166	3010.75	4.2e-11	1.38e-10	0.047117	0.0491172	1.16e-10	2.44e-09	7.46e-10	2.91e-08	protein_coding	84918
ACTR10	ENSG00000131966	1157.73	1476.75	1757.02	4.25e-11	1.4e-10	4.12e-08	3.12e-07	2.26e-07	7.16e-07	0.0271943	0.0296239	protein_coding	55860
NAA20	ENSG00000173418	1347.38	1921.15	2029.4	4.27e-11	1.4e-10	1.28e-10	1.97e-09	0.000103413	0.00012089	0.955595	0.40484	protein_coding	51126
ADSSL1	ENSG00000185100	163.595	230.531	486.987	4.27e-11	1.4e-10	7.59e-05	0.000223165	2.05e-09	1.75e-08	2.35e-06	1.17e-05	protein_coding	122622
TOB2	ENSG00000183864	2026.77	2037.36	5649.35	4.28e-11	1.41e-10	0.767036	0.36954	2e-11	9.73e-10	2.89e-10	2.17e-08	protein_coding	10766
NDUFB9	ENSG00000147684	3422.08	7116.16	6794.05	4.29e-11	1.41e-10	2.73e-11	5.11e-10	0.00118734	0.00097871	0.27894	0.17871	protein_coding	4715
ATP6V1A	ENSG00000114573	2822.1	2787.95	6313.37	4.31e-11	1.41e-10	0.50886	0.282661	3.73e-11	1.29e-09	1.29e-10	2.17e-08	protein_coding	523
RER1	ENSG00000157916	2454.79	2987.28	4340.04	4.37e-11	1.43e-10	2.57e-05	8.73e-05	5.76e-09	3.83e-08	3.38e-06	1.58e-05	protein_coding	11079
GFRA2	ENSG00000168546	31.9524	142.85	144.508	4.38e-11	1.43e-10	2.61e-10	3.62e-09	4.28e-05	5.73e-05	0.945741	0.40245	protein_coding	2675
C19orf71	ENSG00000183397	16.7707	14.884	57.4011	4.38e-11	1.43e-10	0.427535	0.251996	2.29e-11	1.03e-09	4.3e-10	2.24e-08	protein_coding	100128569
KHK	ENSG00000138030	85.9347	201.385	182.423	4.41e-11	1.44e-10	5.56e-11	9.54e-10	0.000426763	0.000406921	0.363101	0.216479	protein_coding	3795
TSPAN14	ENSG00000108219	3770.41	3298.08	7999.87	4.43e-11	1.44e-10	0.0266366	0.0313867	1.38e-10	2.67e-09	1.62e-09	4.54e-08	protein_coding	81619
	ENSG00000275322	5.0086	5.74004	23.7296	4.46e-11	1.45e-10	0.485133	0.274039	1.6e-11	9.05e-10	7.46e-10	2.91e-08	lincRNA
TMEM39B	ENSG00000121775	285.219	416.952	522.202	4.47e-11	1.45e-10	3.46e-08	2.69e-07	3.43e-07	1.01e-06	0.0184132	0.0214748	protein_coding	55116
HLA-C	ENSG00000206435	403.289	46.4602	81.8493	4.47e-11	1.45e-10	9.01e-10	1.08e-08	8.29e-06	1.44e-05	0.484478	0.264145	protein_coding	3107
ZBTB10	ENSG00000205189	3154.33	2323.98	7799.53	4.47e-11	1.45e-10	0.00545829	0.00858992	2.05e-09	1.75e-08	4.3e-10	2.24e-08	protein_coding	65986
KDELR2	ENSG00000136240	5201.27	5854.92	10522.9	4.49e-11	1.45e-10	0.0189659	0.0239187	8.56e-11	2.04e-09	8.41e-09	1.36e-07	protein_coding	11014
FBRS	ENSG00000156860	1762.86	1962.89	3487.02	4.49e-11	1.45e-10	0.00523372	0.00827854	3.81e-10	5.25e-09	5.02e-09	9.43e-08	protein_coding	64319
SHANK2	ENSG00000162105	556.612	367.747	1627.82	4.54e-11	1.47e-10	0.00135383	0.00267724	2.22e-09	1.86e-08	4.32e-09	8.5e-08	protein_coding	22941
PKD1	ENSG00000008710	1767.36	1559.93	3884.71	4.6e-11	1.49e-10	0.200417	0.147596	8.2e-11	1.98e-09	1.65e-10	2.17e-08	protein_coding	102465429
PKD1	ENSG00000008710	1767.36	1559.93	3884.71	4.6e-11	1.49e-10	0.200417	0.147596	8.2e-11	1.98e-09	1.65e-10	2.17e-08	protein_coding	5310
RAB7A	ENSG00000075785	5100.07	6594.14	8578.14	4.62e-11	1.49e-10	5.57e-07	3.06e-06	4.32e-08	1.83e-07	0.00106465	0.00202625	protein_coding	7879
BLVRA	ENSG00000106605	681.147	901.843	1507.84	4.62e-11	1.49e-10	8.27e-05	0.000240612	1.75e-09	1.57e-08	3.59e-06	1.66e-05	protein_coding	644
NDUFS7	ENSG00000115286	670.545	883.99	1415.48	4.64e-11	1.49e-10	1.78e-05	6.29e-05	7.28e-09	4.6e-08	6.11e-06	2.6e-05	protein_coding	374291
	ENSG00000254339	15.0564	41.2765	64.0633	4.67e-11	1.5e-10	1.89e-08	1.59e-07	8.03e-07	2.03e-06	0.0140418	0.0171245	lincRNA
STOML2	ENSG00000165283	2035.95	2951.58	3009.15	4.7e-11	1.51e-10	8.76e-11	1.4e-09	0.000216084	0.000226686	0.625009	0.312415	protein_coding	30968
MGAT4B	ENSG00000161013	2715.64	3894.19	4861.44	4.71e-11	1.51e-10	9.4e-09	8.51e-08	1.66e-06	3.73e-06	0.0178085	0.0209037	protein_coding	11282
AP5B1	ENSG00000254470	609.763	647.606	1544.73	4.85e-11	1.56e-10	0.248348	0.172115	3.73e-11	1.29e-09	4.66e-10	2.32e-08	protein_coding	91056
NSUN2	ENSG00000037474	1656.31	2347.53	2796.82	4.88e-11	1.56e-10	4.08e-09	4.05e-08	2.08e-06	4.5e-06	0.237327	0.159229	protein_coding	54888
	ENSG00000258472	327.895	268.855	1171.35	4.92e-11	1.57e-10	0.340355	0.214829	6.6e-11	1.74e-09	1.29e-10	2.17e-08	protein_coding
	ENSG00000259692	84.3878	41.6776	30.8782	4.92e-11	1.57e-10	9.03e-09	8.21e-08	1.61e-06	3.64e-06	0.0280674	0.0303395	lincRNA
	ENSG00000197670	40.1281	18.8632	71.8919	4.93e-11	1.58e-10	6.77e-08	4.87e-07	0.000308656	0.000307683	2.67e-08	3.21e-07	antisense
STIM1	ENSG00000167323	1123.02	1395.8	2841.64	4.99e-11	1.59e-10	0.00322412	0.00552008	2.61e-10	4.06e-09	5.02e-08	5.18e-07	protein_coding	100616453
STIM1	ENSG00000167323	1123.02	1395.8	2841.64	4.99e-11	1.59e-10	0.00322412	0.00552008	2.61e-10	4.06e-09	5.02e-08	5.18e-07	protein_coding	6786
	ENSG00000267632	10.5805	11.5974	38.1166	5e-11	1.59e-10	0.28343	0.189584	2.99e-11	1.16e-09	6.38e-10	2.63e-08	sense_intronic
RNF19A	ENSG00000034677	2596.19	1913.78	5911.57	5.08e-11	1.62e-10	0.00201143	0.00374657	8.17e-09	4.95e-08	4.3e-10	2.24e-08	protein_coding	25897
PAX8	ENSG00000125618	6521.73	6748.73	18146.8	5.09e-11	1.62e-10	0.670361	0.338619	1.83e-11	9.33e-10	5.9e-10	2.55e-08	protein_coding	7849
BCKDK	ENSG00000103507	988.381	1150.08	1969.46	5.09e-11	1.62e-10	0.00344358	0.00582428	2.84e-10	4.24e-09	3.79e-08	4.2e-07	protein_coding	10295
APLP2	ENSG00000084234	14107.9	16088.6	41606.9	5.11e-11	1.62e-10	0.0300729	0.0345924	1.06e-10	2.32e-09	2.97e-09	6.63e-08	protein_coding	334
GET4	ENSG00000239857	869.924	1153.41	1949.12	5.12e-11	1.62e-10	0.000175039	0.000462412	1.55e-09	1.43e-08	9.89e-07	5.74e-06	protein_coding	51608
TBCE	ENSG00000116957	495.332	776.682	866.211	5.12e-11	1.62e-10	1.97e-09	2.17e-08	5.06e-06	9.51e-06	0.313233	0.194534	protein_coding	6905
CLSTN1	ENSG00000171603	5472.08	5748.14	14512.7	5.19e-11	1.64e-10	0.338634	0.214023	2.99e-11	1.16e-09	5.45e-10	2.53e-08	protein_coding	22883
FFAR2	ENSG00000126262	59.0094	12.1463	-72.6178	5.2e-11	1.64e-10	1.37e-06	6.75e-06	2.47e-08	1.16e-07	0.000495431	0.0010482	protein_coding	2867
ALG1L13P	ENSG00000253981	32.4851	21.9836	7.87396	5.24e-11	1.66e-10	5.22e-05	0.000161597	9.11e-10	9.71e-09	7.32e-05	0.000207073	transcribed_unprocessed_pseudogene
FAM95B1	ENSG00000223839	31.6852	31.4841	184.311	5.32e-11	1.68e-10	0.934865	0.416016	1.75e-11	9.31e-10	5.9e-10	2.55e-08	lincRNA	105379252
FAM95B1	ENSG00000223839	31.6852	31.4841	184.311	5.32e-11	1.68e-10	0.934865	0.416016	1.75e-11	9.31e-10	5.9e-10	2.55e-08	lincRNA	100133036
FAM156A	ENSG00000268350	398.55	455.097	995.583	5.34e-11	1.68e-10	0.080069	0.0741607	3.73e-11	1.29e-09	4.32e-09	8.5e-08	protein_coding	29057
CEBPD	ENSG00000221869	2008.86	2312.18	7043.14	5.43e-11	1.71e-10	0.066444	0.0641671	1.02e-10	2.26e-09	8.07e-10	3.08e-08	protein_coding	1052
	ENSG00000273142	100.765	73.7419	196.802	5.46e-11	1.72e-10	1.58e-05	5.64e-05	1.71e-07	5.66e-07	3.54e-08	3.96e-07	lincRNA
MELTF	ENSG00000163975	382.975	1031.99	822.095	5.47e-11	1.72e-10	8.44e-12	1.78e-10	0.00928533	0.0057265	0.209139	0.145392	protein_coding	4241
GSTO1	ENSG00000148834	1474.72	2151	2299.32	5.47e-11	1.72e-10	1.54e-10	2.27e-09	0.000115118	0.000132213	0.847904	0.377188	protein_coding	9446
CSNK1G2	ENSG00000133275	1345	1506.73	2683.11	5.51e-11	1.73e-10	0.0235449	0.0284834	6.04e-11	1.67e-09	2.01e-08	2.55e-07	protein_coding	1455
TPCN2	ENSG00000162341	272.305	308.512	573.448	5.51e-11	1.73e-10	0.0160624	0.0209207	1.63e-10	3.06e-09	5.4e-09	9.84e-08	protein_coding	219931
SNX9	ENSG00000130340	1665.6	1783.74	4147.34	5.51e-11	1.73e-10	0.213902	0.154731	4.45e-11	1.39e-09	5.9e-10	2.55e-08	protein_coding	51429
TDGF1	ENSG00000241186	143.464	-24.4197	21.9353	5.56e-11	1.74e-10	2.92e-10	4e-09	8.11e-05	9.8e-05	0.109067	0.0884838	protein_coding	6997
SLC7A2	ENSG00000003989	2070.24	2488.42	21088.6	5.57e-11	1.74e-10	0.159618	0.124954	3.9e-11	1.32e-09	1.28e-09	3.97e-08	protein_coding	6542
	ENSG00000260317	43.8835	32.3412	172.361	5.61e-11	1.76e-10	0.0892801	0.0806195	1.26e-10	2.55e-09	4.66e-10	2.32e-08	lincRNA
ATP5O	ENSG00000241837	3136.01	4570.52	4804.78	5.62e-11	1.76e-10	7.48e-11	1.23e-09	0.000300973	0.000301618	0.995064	0.41464	protein_coding	539
LAMC1	ENSG00000135862	13022.1	11052.8	51615.9	5.73e-11	1.79e-10	0.409903	0.244829	4.45e-11	1.39e-09	2.89e-10	2.17e-08	protein_coding	3915
PRR14	ENSG00000156858	524.85	687.807	882.16	5.75e-11	1.79e-10	2.58e-07	1.56e-06	1.2e-07	4.17e-07	0.0015696	0.00279549	protein_coding	78994
HLA-DQB1	ENSG00000225824	202.133	-31.8905	244.178	5.76e-11	1.8e-10	4.32e-11	7.63e-10	0.406491	0.139568	1.22e-05	4.61e-05	protein_coding	3119
TMEM132E	ENSG00000181291	71.2148	-25.6849	12.4551	5.81e-11	1.81e-10	2.92e-10	4e-09	0.000100668	0.000118277	0.0643312	0.0585767	protein_coding	124842
LINC01541	ENSG00000260676	620.208	327.552	4054.83	5.81e-11	1.81e-10	0.00322412	0.00552008	2.4e-10	3.86e-09	3.54e-08	3.96e-07	lincRNA	100505776
IRAK1	ENSG00000184216	3436.49	5781.09	6511.38	5.82e-11	1.81e-10	4.14e-10	5.44e-09	3.61e-05	4.96e-05	0.771217	0.356672	protein_coding	100313781
IRAK1	ENSG00000184216	3436.49	5781.09	6511.38	5.82e-11	1.81e-10	4.14e-10	5.44e-09	3.61e-05	4.96e-05	0.771217	0.356672	protein_coding	3654
	ENSG00000272356	49.7077	63.439	110.96	5.92e-11	1.84e-10	0.000652897	0.00144501	4.51e-10	5.88e-09	1.05e-06	6.04e-06	antisense
SPPL2B	ENSG00000005206	783.927	935.282	1723.76	5.94e-11	1.84e-10	0.00189915	0.00356506	2.3e-10	3.78e-09	3.79e-07	2.59e-06	protein_coding	56928
ATXN2	ENSG00000204842	821.796	779.131	1605.8	5.98e-11	1.85e-10	0.310222	0.201603	4.86e-11	1.44e-09	3.98e-10	2.21e-08	protein_coding	6311
CREB3L1	ENSG00000157613	645.173	102.62	284.839	6.01e-11	1.86e-10	4.85e-11	8.45e-10	0.00139274	0.00112465	0.0985554	0.0816873	protein_coding	90993
LSM14A	ENSG00000262860	2511.53	3593.7	4382.57	6.01e-11	1.86e-10	4.91e-09	4.78e-08	2.87e-06	5.9e-06	0.106359	0.0866591	protein_coding	26065
RGPD6	ENSG00000183054	1138.25	1113.33	2886.31	6.01e-11	1.86e-10	0.926745	0.413857	2.73e-11	1.12e-09	3.67e-10	2.17e-08	protein_coding	729540
RGPD6	ENSG00000183054	1138.25	1113.33	2886.31	6.01e-11	1.86e-10	0.926745	0.413857	2.73e-11	1.12e-09	3.67e-10	2.17e-08	protein_coding	84220
BAG1	ENSG00000107262	1377.65	2070.77	2662.48	6.01e-11	1.86e-10	3.61e-09	3.63e-08	3.94e-06	7.7e-06	0.126473	0.0991497	protein_coding	573
BORCS8	ENSG00000254901	319.811	354.904	795.526	6.03e-11	1.86e-10	0.0486525	0.0503305	1.21e-10	2.5e-09	1.39e-09	4.2e-08	protein_coding	729991
NUMB	ENSG00000133961	1485.03	1438.94	2913.76	6.1e-11	1.88e-10	0.623884	0.322927	4.07e-11	1.36e-09	2.46e-10	2.17e-08	protein_coding	101928143
NUMB	ENSG00000133961	1485.03	1438.94	2913.76	6.1e-11	1.88e-10	0.623884	0.322927	4.07e-11	1.36e-09	2.46e-10	2.17e-08	protein_coding	8650
ZFAND3	ENSG00000156639	1862.96	2285.02	3472.49	6.11e-11	1.88e-10	6.12e-05	0.000185787	3.59e-09	2.66e-08	3.38e-06	1.58e-05	protein_coding	60685
EIF5A2	ENSG00000163577	471.956	147.57	201.254	6.15e-11	1.89e-10	4.14e-10	5.44e-09	7.67e-05	9.36e-05	0.0318054	0.0335502	protein_coding	56648
BCAN	ENSG00000132692	5.50393	70.3536	75.8375	6.19e-11	1.9e-10	9.21e-09	8.36e-08	1.46e-06	3.34e-06	0.0960582	0.0801409	protein_coding	63827
FBXO8	ENSG00000164117	531.925	468.689	2959.5	6.2e-11	1.9e-10	0.940282	0.417557	2.5e-11	1.07e-09	4.66e-10	2.32e-08	protein_coding	26269
PTPRO	ENSG00000151490	290.139	9.44347	98.151	6.24e-11	1.91e-10	1.12e-10	1.76e-09	0.0011604	0.000959548	0.00711755	0.0098261	protein_coding	5800
ATP6V0E1	ENSG00000113732	3523.79	3080.79	8546.62	6.29e-11	1.93e-10	0.138534	0.112344	1.38e-10	2.67e-09	2.67e-10	2.17e-08	protein_coding	8992
HPRT1	ENSG00000165704	804.322	1324.94	1271.96	6.39e-11	1.96e-10	1.63e-11	3.17e-10	0.00326898	0.00234564	0.47678	0.261455	protein_coding	3251
COL18A1	ENSG00000182871	10591.4	13251.1	28193.4	6.42e-11	1.96e-10	0.00759197	0.0112623	2.11e-10	3.58e-09	2.48e-08	3.03e-07	protein_coding	80781
NAPSB	ENSG00000131401	480.884	-4.10275	177.335	6.48e-11	1.98e-10	2.24e-10	3.16e-09	0.00011208	0.000129322	0.383017	0.224652	transcribed_unprocessed_pseudogene	256236
EMC7	ENSG00000134153	897.8	1086.03	1636.97	6.49e-11	1.98e-10	1.35e-05	4.93e-05	9.18e-09	5.41e-08	2.26e-05	7.69e-05	protein_coding	56851
XRCC1	ENSG00000073050	759.693	1171.86	1193.51	6.6e-11	2.01e-10	1.4e-10	2.1e-09	0.000166688	0.000181565	0.790212	0.361862	protein_coding	7515
PDCL3	ENSG00000115539	643.303	633.621	1429.12	6.61e-11	2.01e-10	0.97012	0.425212	2.99e-11	1.16e-09	3.98e-10	2.21e-08	protein_coding	79031
WASF2	ENSG00000158195	3359.2	3808.43	6152.52	6.7e-11	2.04e-10	0.00288651	0.005038	8.74e-10	9.52e-09	9.74e-09	1.49e-07	protein_coding	10163
DPY19L3	ENSG00000178904	790.195	1569.64	2138.13	6.75e-11	2.05e-10	1.67e-09	1.87e-08	8.54e-06	1.47e-05	0.432023	0.244286	protein_coding	147991
PRKCD	ENSG00000163932	1123.75	1814.44	1803.09	6.76e-11	2.05e-10	3.6e-11	6.52e-10	0.0011604	0.000959548	0.625009	0.312415	protein_coding	5580
KCNRG	ENSG00000198553	79.1773	9.85371	-10.6275	7.01e-11	2.13e-10	8.67e-09	7.93e-08	8.58e-07	2.15e-06	0.76177	0.353981	protein_coding	283518
MSH4	ENSG00000057468	35.1676	5.31565	-100.823	7.05e-11	2.14e-10	0.00161469	0.00310625	5.55e-10	6.8e-09	1.31e-07	1.11e-06	protein_coding	4438
PIDD1	ENSG00000177595	299.943	344.136	708.675	7.05e-11	2.14e-10	0.00699801	0.010529	5.78e-10	7.01e-09	4.01e-09	8.08e-08	protein_coding	55367
	ENSG00000243312	81.0912	99.0402	32.5573	7.07e-11	2.14e-10	0.000686261	0.00150741	1.03e-08	5.91e-08	4.32e-09	8.5e-08	processed_pseudogene
APOC4-APOC2	ENSG00000224916	81.8916	211.316	230.642	7.2e-11	2.18e-10	3.19e-10	4.33e-09	6.88e-05	8.53e-05	0.92606	0.397618	protein_coding	344
EEF1A2	ENSG00000101210	1009.17	42.5382	7885.17	7.25e-11	2.19e-10	0.00123117	0.00246764	5.54e-09	3.74e-08	4.01e-09	8.08e-08	protein_coding	1917
CSF1	ENSG00000184371	1030.14	2329.72	2055.5	7.26e-11	2.19e-10	3.94e-11	7.05e-10	0.00170496	0.00133943	0.247294	0.163887	protein_coding	1435
FER1L4	ENSG00000088340	163.708	121.595	742.469	7.27e-11	2.19e-10	0.326738	0.208754	7.52e-11	1.89e-09	2.89e-10	2.17e-08	transcribed_unitary_pseudogene
ZFP36L1	ENSG00000185650	7287.39	9521.69	14774.9	7.29e-11	2.19e-10	0.00010656	0.000300843	2.22e-09	1.86e-08	4.55e-06	2.02e-05	protein_coding	677
PSMA7	ENSG00000101182	3321.04	4729.52	5311.95	7.45e-11	2.24e-10	3.8e-10	5.06e-09	5.83e-05	7.42e-05	0.642636	0.318392	protein_coding	5688
PLEKHM2	ENSG00000116786	1499.46	1710.18	2733.04	7.46e-11	2.24e-10	0.00124592	0.00248891	1.32e-09	1.27e-08	3.79e-08	4.2e-07	protein_coding	23207
TMEM109	ENSG00000110108	1621.99	2224.46	2501.13	7.51e-11	2.26e-10	8.27e-10	9.97e-09	2.42e-05	3.53e-05	0.383017	0.224652	protein_coding	79073
JUND	ENSG00000130522	2612.56	2897.78	7669.22	7.54e-11	2.26e-10	0.177507	0.135035	4.65e-11	1.4e-09	1.75e-09	4.74e-08	protein_coding	3727
EIF4E3	ENSG00000163412	1047.74	788.115	3102.72	7.57e-11	2.27e-10	0.00891717	0.0128632	6.03e-10	7.18e-09	3.72e-09	7.63e-08	protein_coding	317649
FLOT2	ENSG00000132589	2161.2	2699.54	5095.86	7.61e-11	2.28e-10	0.000200404	0.000519716	3.73e-09	2.73e-08	2.91e-07	2.09e-06	protein_coding	2319
AIF1	ENSG00000204472	58.3623	104.753	108.129	7.64e-11	2.29e-10	3.12e-10	4.24e-09	7.67e-05	9.36e-05	0.828566	0.372105	protein_coding	199
MRNIP	ENSG00000161010	728.335	669.487	1491.04	7.7e-11	2.3e-10	0.368664	0.22753	8.56e-11	2.04e-09	2.27e-10	2.17e-08	protein_coding	51149
PNO1	ENSG00000115946	769.696	1081.55	1248.45	7.7e-11	2.3e-10	2.01e-09	2.21e-08	9.65e-06	1.63e-05	0.218252	0.15005	protein_coding	56902
SRGAP1	ENSG00000196935	793.88	592.932	1527.56	7.71e-11	2.3e-10	0.000276069	0.000685978	6.96e-08	2.66e-07	1.75e-09	4.74e-08	protein_coding	57522
WDFY3-AS2	ENSG00000180769	55.122	59.2096	199.07	7.8e-11	2.33e-10	0.102152	0.089211	1.06e-10	2.32e-09	9.43e-10	3.32e-08	processed_transcript	404201
TMEM259	ENSG00000182087	2094.46	2428.28	4401.58	7.85e-11	2.34e-10	0.010862	0.0151725	1.94e-10	3.39e-09	2.48e-08	3.03e-07	protein_coding	91304
LYG2	ENSG00000185674	36.7865	-2.35681	8.30096	7.88e-11	2.35e-10	6.38e-11	1.07e-09	0.00145718	0.00116835	0.0985554	0.0816873	protein_coding	254773
PRELP	ENSG00000188783	471.945	1201.92	948.804	7.9e-11	2.35e-10	4.04e-11	7.2e-10	0.00247638	0.00184872	0.132733	0.102934	protein_coding	5549
PIGZ	ENSG00000119227	85.6681	156.09	246.511	7.93e-11	2.36e-10	5.77e-07	3.17e-06	8.65e-08	3.19e-07	0.00106465	0.00202625	protein_coding	80235
MIB2	ENSG00000197530	699.91	831.617	1455.65	8.01e-11	2.38e-10	0.001523	0.0029505	9.11e-10	9.71e-09	7.09e-08	6.73e-07	protein_coding	142678
C1orf226	ENSG00000239887	732.324	214.542	478.093	8.04e-11	2.38e-10	2.26e-11	4.33e-10	0.00751173	0.00477894	0.0757931	0.0664909	protein_coding	400793
KCNE1	ENSG00000180509	61.9578	-8.46877	16.5538	8.05e-11	2.38e-10	2.24e-10	3.16e-09	0.000396257	0.000380807	0.0196768	0.0226998	protein_coding	102723475
KCNE1	ENSG00000180509	61.9578	-8.46877	16.5538	8.05e-11	2.38e-10	2.24e-10	3.16e-09	0.000396257	0.000380807	0.0196768	0.0226998	protein_coding	3753
SPINK9	ENSG00000204909	27.8075	14.1238	-4.05667	8.05e-11	2.38e-10	7.25e-07	3.85e-06	7.56e-09	4.73e-08	0.114645	0.0918194	protein_coding	643394
SRSF4	ENSG00000116350	1592.68	1655.34	2939.99	8.06e-11	2.38e-10	0.462018	0.265758	2.86e-11	1.14e-09	1.28e-09	3.97e-08	protein_coding	6429
MTG1	ENSG00000148824	609.248	910.905	1345.58	8.13e-11	2.4e-10	1.74e-06	8.32e-06	5.01e-08	2.05e-07	0.000190956	0.000465573	protein_coding	92170
COL27A1	ENSG00000196739	666.671	895.205	2680.4	8.2e-11	2.42e-10	0.0445283	0.0470147	6.89e-11	1.8e-09	1.3e-08	1.84e-07	protein_coding	85301
AVPI1	ENSG00000119986	283.452	257.718	1024.08	8.23e-11	2.43e-10	0.80632	0.381024	3.73e-11	1.29e-09	5.04e-10	2.42e-08	protein_coding	60370
NDUFAB1	ENSG00000004779	1180.38	1773.2	1744.64	8.32e-11	2.45e-10	3.77e-11	6.77e-10	0.00166734	0.00131336	0.47678	0.261455	protein_coding	4706
TIMM8A	ENSG00000126953	248.907	412.282	398.268	8.33e-11	2.45e-10	2.32e-11	4.41e-10	0.0030679	0.00221926	0.484478	0.264145	protein_coding	1678
CORO6	ENSG00000167549	50.2964	43.3494	305.385	8.35e-11	2.45e-10	0.491544	0.276217	4.25e-11	1.39e-09	6.38e-10	2.63e-08	protein_coding	84940
COMMD6	ENSG00000188243	1705.4	2773.96	2653.18	8.35e-11	2.45e-10	8.96e-11	1.43e-09	0.000586057	0.000532324	0.383017	0.224652	protein_coding	170622
PKIB	ENSG00000135549	124.005	397.966	352.099	8.36e-11	2.45e-10	7.14e-11	1.18e-09	0.000964342	0.000818732	0.232451	0.15689	protein_coding	5570
FAM92B	ENSG00000153789	84.7757	-18.6345	0.716582	8.38e-11	2.46e-10	5.04e-10	6.47e-09	8.56e-05	0.000102788	0.0498508	0.0479655	protein_coding	339145
ATF3	ENSG00000162772	1258.49	2964.26	3362.91	8.39e-11	2.46e-10	3.48e-10	4.68e-09	7.89e-05	9.57e-05	0.838223	0.374988	protein_coding	467
LDHA	ENSG00000134333	16754.2	15064.3	41853.7	8.5e-11	2.49e-10	0.145938	0.116831	9.34e-11	2.12e-09	9.43e-10	3.32e-08	protein_coding	3939
FAM102A	ENSG00000167106	1271.8	1826.09	2294.26	8.56e-11	2.5e-10	3.12e-09	3.22e-08	8.29e-06	1.44e-05	0.0912158	0.0769602	protein_coding	399665
WWC2	ENSG00000151718	734.393	800.645	1985.09	8.59e-11	2.51e-10	0.181926	0.137494	6.89e-11	1.8e-09	1.1e-09	3.59e-08	protein_coding	80014
TFCP2L1	ENSG00000115112	1015.37	650.413	3357.5	8.64e-11	2.52e-10	0.000968007	0.00201144	1.55e-09	1.43e-08	4.68e-08	4.93e-07	protein_coding	29842
EXOSC8	ENSG00000120699	420.553	585.186	746.376	8.67e-11	2.53e-10	7.16e-08	5.11e-07	5.54e-07	1.5e-06	0.00568293	0.00814155	protein_coding	11340
SLFNL1	ENSG00000171790	42.3592	31.6977	99.6539	8.7e-11	2.54e-10	0.000413649	0.000977102	1.57e-08	8.14e-08	9.05e-09	1.42e-07	protein_coding	200172
	ENSG00000228830	259.182	442.541	479.752	8.72e-11	2.54e-10	4.62e-10	5.99e-09	5.67e-05	7.24e-05	0.790212	0.361862	antisense
PPP5C	ENSG00000011485	1187.61	1784.32	1976.03	8.74e-11	2.54e-10	6.12e-10	7.69e-09	4.05e-05	5.45e-05	0.642636	0.318392	protein_coding	5536
PRPH	ENSG00000135406	189.454	-95.6083	-53.0534	8.75e-11	2.54e-10	3.48e-10	4.68e-09	8.79e-05	0.000105274	0.625009	0.312415	protein_coding	5630
PTPRM	ENSG00000173482	1271.86	1521.29	4711.16	8.78e-11	2.55e-10	0.0711107	0.0676886	8.94e-11	2.07e-09	3.72e-09	7.63e-08	protein_coding	5797
FGFBP3	ENSG00000174721	101.676	-24.6618	14.7957	8.83e-11	2.56e-10	8.37e-11	1.34e-09	0.000818442	0.000711546	0.252386	0.166274	protein_coding	143282
NAE1	ENSG00000159593	880.535	1320.84	1281.93	8.84e-11	2.56e-10	7.82e-11	1.28e-09	0.000558392	0.000510771	0.916235	0.395342	protein_coding	8883
LEPROT	ENSG00000213625	2650.63	2795.81	5491.58	8.96e-11	2.59e-10	0.17103	0.131565	6.6e-11	1.74e-09	1.5e-09	4.39e-08	protein_coding	54741
C10orf35	ENSG00000171224	163.068	251.915	320.467	9.09e-11	2.63e-10	3.2e-08	2.51e-07	7.76e-07	1.98e-06	0.038209	0.0387776	protein_coding	219738
DTX1	ENSG00000135144	160.099	101.709	415.202	9.09e-11	2.63e-10	0.000279737	0.000693123	1.51e-08	7.92e-08	2.01e-08	2.55e-07	protein_coding	1840
PEAR1	ENSG00000187800	87.5303	94.4446	317.365	9.1e-11	2.63e-10	0.480884	0.272503	4.07e-11	1.36e-09	8.72e-10	3.16e-08	protein_coding	375033
ZNF780A	ENSG00000197782	478.078	1034.99	1179.44	9.12e-11	2.63e-10	2.7e-09	2.84e-08	6.1e-06	1.11e-05	0.809332	0.366774	protein_coding	284323
TRAPPC6A	ENSG00000007255	361.346	724.509	682.461	9.18e-11	2.64e-10	1.26e-10	1.94e-09	0.000358745	0.000350387	0.669456	0.326649	protein_coding	79090
KIAA0196	ENSG00000164961	1573.42	2810.64	2916.13	9.18e-11	2.64e-10	3.88e-10	5.13e-09	7.67e-05	9.36e-05	0.995064	0.41464	protein_coding	9897
SCPEP1	ENSG00000121064	1685.69	2852.01	4116.12	9.21e-11	2.65e-10	1.09e-09	1.28e-08	3.51e-05	4.85e-05	0.0405739	0.0407624	protein_coding	59342
	ENSG00000276805	25.1758	15.0403	38.5169	9.24e-11	2.65e-10	9.5e-08	6.51e-07	0.000239451	0.000247367	8.14e-08	7.47e-07	transcribed_unprocessed_pseudogene
SLC4A11	ENSG00000088836	346.791	1077.32	1039.79	9.32e-11	2.68e-10	1.64e-10	2.4e-09	0.000470855	0.000442394	0.101104	0.0832932	protein_coding	83959
DAPL1	ENSG00000163331	845.077	2655.25	2488.26	9.33e-11	2.68e-10	2.1e-10	2.99e-09	0.000245653	0.000252809	0.252386	0.166274	protein_coding	92196
PLPPR3	ENSG00000129951	53.0272	-3.9985	-0.411279	9.34e-11	2.68e-10	5.49e-10	7e-09	5.51e-05	7.06e-05	0.432023	0.244286	protein_coding	79948
FAM84B	ENSG00000168672	3757.13	3172.56	12383.7	9.35e-11	2.68e-10	0.338634	0.214023	1.11e-10	2.4e-09	2.67e-10	2.17e-08	protein_coding	157638
CAMTA2	ENSG00000108509	583.62	621.658	1241.01	9.42e-11	2.7e-10	0.0510339	0.0522824	2.72e-10	4.13e-09	8.07e-10	3.08e-08	protein_coding	23125
LZTR1	ENSG00000099949	1370.1	359.18	1392.03	9.45e-11	2.7e-10	6.98e-12	1.51e-10	0.890827	0.257321	0.00121328	0.00225765	protein_coding	8216
CRYZL1	ENSG00000205758	440.693	528.733	809.95	9.45e-11	2.7e-10	2.21e-05	7.59e-05	2.13e-08	1.03e-07	2.35e-06	1.17e-05	protein_coding	9946
	ENSG00000253284	26.8556	48.4804	44.9833	9.54e-11	2.72e-10	6.97e-10	8.58e-09	3.94e-05	5.33e-05	0.556698	0.290739	sense_intronic
MORN5	ENSG00000185681	67.6684	-19.149	29.0398	9.63e-11	2.75e-10	1.12e-10	1.76e-09	0.00681106	0.00438918	0.000892608	0.00174066	protein_coding	254956
COL2A1	ENSG00000139219	552.529	-346.796	132.214	9.64e-11	2.75e-10	5.19e-11	8.95e-10	0.00411321	0.00285505	0.0393764	0.0397793	protein_coding	1280
SEMA4G	ENSG00000095539	187.639	242.136	917.714	9.65e-11	2.75e-10	0.0727248	0.0688569	8.94e-11	2.07e-09	4.66e-09	8.95e-08	protein_coding	57715
	ENSG00000197550	16.2292	51.0555	44.0818	9.71e-11	2.76e-10	2.92e-11	5.46e-10	0.00326898	0.00234564	0.369667	0.219306	unprocessed_pseudogene
EFNA1	ENSG00000169242	1681.63	1854.55	5072.06	9.72e-11	2.76e-10	0.103589	0.0901384	1.02e-10	2.26e-09	1.88e-09	4.95e-08	protein_coding	1942
NR4A3	ENSG00000119508	354.106	949.234	-530.388	9.78e-11	2.78e-10	1.1e-08	9.85e-08	0.00264183	0.00195235	2.39e-07	1.79e-06	protein_coding	8013

## Sheet: Supp Table 6 Replication DE GEO
Supplemental Table 6:Results from analysis of 1,254 differential expressed genes in the 8 GEO studies. Note: not all studies had all 1,254 genes and not all studies have all three histologies.
					Mean Expression Level
Study	Gene	No. CC	No. EC	No. Serous	CC	EC	Serous	Kruskal-Wallis P
GSE6008	AADAC	8	37	41	6.46174	6.70462	7.34138	9.41e-06
GSE26193	AADAC	6	8	79	4.50167	4.42098	5.98398	9.81e-06
GSE44104	AADAC	12	11	28	4.9197	6.02968	6.46731	0.00189155
GSE2109	AADAC	9	28	81	4.86296	5.61174	5.74419	0.0323179
GSE51088	AADAC	3	6	100	-0.221713	-0.19902	-0.0302484	0.104424
GSE14764	AADAC	2	6	68	6.24817	7.07858	7.07822	0.107218
GSE30161	AADAC	5	1	47	4.66735	4.44103	4.94654	0.608892
GSE9891	AADAC	NA	20	246	NA	6.09924	6.06496	0.79492
GSE44104	AATF	12	11	28	9.15965	8.82287	8.81356	0.0108437
GSE6008	AATF	8	37	41	9.56816	9.28824	9.35215	0.233196
GSE9891	AATF	NA	20	246	NA	8.80288	8.7462	0.325961
GSE2109	AATF	9	28	81	8.74992	8.5456	8.6011	0.34144
GSE51088	AATF	3	6	100	0.00244667	-0.032355	-0.0587642	0.472746
GSE30161	AATF	5	1	47	7.66743	7.67582	7.36928	0.578188
GSE14764	AATF	2	6	68	9.64924	9.51064	9.47811	0.631526
GSE26193	AATF	6	8	79	8.70642	8.77111	8.80503	0.915316
GSE51088	ABCC5	3	6	100	0.130263	-0.161553	-0.0316622	0.0414059
GSE6008	ABCC5	8	37	41	8.98791	8.47709	8.49794	0.0867085
GSE30161	ABCC5	5	1	47	7.5191	6.57276	6.77385	0.12866
GSE44104	ABCC5	12	11	28	7.89664	7.56128	7.81029	0.27988
GSE14764	ABCC5	2	6	68	8.75957	8.28944	8.50324	0.282707
GSE2109	ABCC5	9	28	81	7.67121	8.08387	7.89043	0.358958
GSE9891	ABCC5	NA	20	246	NA	7.94764	8.08273	0.359778
GSE26193	ABCC5	6	8	79	7.70168	7.70122	7.88794	0.496438
GSE2109	ABCF1	9	28	81	8.31553	8.29779	8.62924	0.0100377
GSE6008	ABCF1	8	37	41	9.41954	9.65734	9.76406	0.0520069
GSE14764	ABCF1	2	6	68	9.32684	9.18812	9.5827	0.149642
GSE9891	ABCF1	NA	20	246	NA	8.95483	8.87243	0.276566
GSE30161	ABCF1	5	1	47	7.09648	6.1737	7.34529	0.331137
GSE26193	ABCF1	6	8	79	8.78517	8.87094	9.00587	0.3978
GSE44104	ABCF1	12	11	28	8.75739	8.82269	8.96129	0.431291
GSE2109	ABHD16A	9	28	81	8.33598	8.48393	8.76791	0.0102634
GSE26193	ABHD16A	6	8	79	8.82992	9.09419	9.0868	0.209425
GSE44104	ABHD16A	12	11	28	8.92813	9.13325	9.12653	0.26339
GSE30161	ABHD16A	5	1	47	6.94794	6.51298	7.37493	0.364791
GSE9891	ABHD16A	NA	20	246	NA	8.94281	8.90428	0.987943
GSE44104	ACTG2	12	11	28	6.92786	8.03201	6.93465	0.0522741
GSE2109	ACTG2	9	28	81	7.66205	7.41635	6.93921	0.0592637
GSE9891	ACTG2	NA	20	246	NA	6.68386	7.0532	0.244576
GSE30161	ACTG2	5	1	47	5.32076	5.67509	5.17982	0.368086
GSE26193	ACTG2	6	8	79	7.56157	6.97372	6.94957	0.548248
GSE51088	ACTG2	3	6	100	-0.57502	-0.336802	-0.382866	0.736492
GSE6008	ACTG2	8	37	41	7.82152	7.91349	7.93625	0.948668
GSE14764	ACTG2	2	6	68	8.11008	8.37779	8.36219	0.962988
GSE44104	ACTL6A	12	11	28	9.07722	9.01552	9.62554	0.00105064
GSE2109	ACTL6A	9	28	81	7.56292	8.47492	8.63712	0.00697969
GSE51088	ACTL6A	3	6	100	-0.109223	-0.160667	-0.0012691	0.0124627
GSE26193	ACTL6A	6	8	79	8.11936	8.27467	8.6767	0.0208407
GSE6008	ACTL6A	8	37	41	6.9244	7.49573	7.65869	0.0225393
GSE9891	ACTL6A	NA	20	246	NA	8.53681	8.71789	0.102659
GSE30161	ACTL6A	5	1	47	4.72667	3.88464	4.81061	0.286727
GSE14764	ACTL6A	2	6	68	6.67135	7.37382	7.39946	0.411847
GSE9891	ACTR10	NA	20	246	NA	9.78219	9.90729	0.0639206
GSE26193	ACTR10	6	8	79	10.0344	10.3245	9.9314	0.0952499
GSE2109	ACTR10	9	28	81	9.5317	9.68892	9.7661	0.103926
GSE44104	ACTR10	12	11	28	10.0963	10.2778	10.0837	0.244916
GSE30161	ACTR10	5	1	47	6.25269	5.98657	6.85887	0.290548
GSE6008	ACTR10	8	37	41	9.94878	10.0056	10.1203	0.300415
GSE14764	ACTR10	2	6	68	9.72448	10.0227	10.0604	0.675146
GSE44104	ACY3	12	11	28	4.73467	5.15592	4.89071	0.0116251
GSE51088	ACY3	3	6	100	-0.01913	0.0655617	0.0127015	0.0875839
GSE2109	ACY3	9	28	81	4.94295	5.27432	5.05304	0.234248
GSE9891	ACY3	NA	20	246	NA	5.20094	5.02774	0.272583
GSE30161	ACY3	5	1	47	5.41631	6.5175	5.34812	0.340392
GSE26193	ACY3	6	8	79	4.87027	5.36778	5.07088	0.55194
GSE26193	ADIRF	6	8	79	5.29189	6.11248	7.71824	0.000648141
GSE6008	ADIRF	8	37	41	7.03967	7.44966	8.51154	0.00146931
GSE2109	ADIRF	9	28	81	6.64054	6.67654	7.60252	0.0244553
GSE9891	ADIRF	NA	20	246	NA	7.06823	7.97236	0.0255123
GSE44104	ADIRF	12	11	28	6.58476	6.48734	7.89036	0.0297372
GSE51088	ADIRF	3	6	100	-0.367733	-0.35389	-0.0697509	0.161864
GSE30161	ADIRF	5	1	47	5.92324	5.30744	6.26221	0.213759
GSE14764	ADIRF	2	6	68	7.4559	8.67997	8.73758	0.389892
GSE44104	ADK	12	11	28	8.85355	8.92926	8.36117	0.00115309
GSE26193	ADK	6	8	79	8.76084	8.50535	8.16417	0.0128616
GSE2109	ADK	9	28	81	8.49171	7.98784	7.84472	0.113024
GSE51088	ADK	3	6	100	0.0258067	0.10962	-0.0375458	0.118402
GSE6008	ADK	8	37	41	9.05786	9.25673	9.11475	0.234192
GSE9891	ADK	NA	20	246	NA	8.38539	8.27913	0.394038
GSE14764	ADK	2	6	68	9.16445	8.86306	8.76474	0.728378
GSE30161	ADK	5	1	47	5.98123	6.40651	5.9456	0.887391
GSE6008	ADRA2A	8	37	41	6.87877	7.13035	6.77769	0.0442917
GSE2109	ADRA2A	9	28	81	5.97731	5.74558	5.27357	0.0801983
GSE14764	ADRA2A	2	6	68	7.88127	6.94965	6.80032	0.141319
GSE26193	ADRA2A	6	8	79	6.28106	6.01727	5.52178	0.250082
GSE51088	ADRA2A	3	6	100	-0.23344	0.00575833	-0.201492	0.295788
GSE44104	ADRA2A	12	11	28	5.93796	6.62304	5.74307	0.388368
GSE9891	ADRA2A	NA	20	246	NA	5.39961	5.49299	0.519723
GSE30161	ADRA2A	5	1	47	5.07311	4.70385	4.86138	0.932383
GSE44104	ADSL	12	11	28	10.1065	9.77726	9.71693	0.0224152
GSE14764	ADSL	2	6	68	10.2551	9.81049	9.65424	0.0903622
GSE26193	ADSL	6	8	79	9.7828	9.86255	9.58339	0.123137
GSE2109	ADSL	9	28	81	9.83425	9.55091	9.58931	0.163033
GSE6008	ADSL	8	37	41	9.9624	9.65195	9.70522	0.388359
GSE30161	ADSL	5	1	47	5.33678	4.80886	5.61408	0.51886
GSE9891	ADSL	NA	20	246	NA	9.81774	9.73353	0.563751
GSE2109	ADSSL1	9	28	81	6.96799	6.16978	6.28529	0.109903
GSE30161	ADSSL1	5	1	47	6.73338	6.69695	6.34434	0.252846
GSE44104	ADSSL1	12	11	28	6.95055	7.21162	6.6344	0.361245
GSE9891	ADSSL1	NA	20	246	NA	6.83242	6.6459	0.395717
GSE26193	ADSSL1	6	8	79	6.79411	6.71559	6.62416	0.812668
GSE51088	ADSSL1	3	6	100	0.0783933	0.14724	0.0690132	0.867697
GSE6008	AFF1	8	37	41	10.981	10.1531	9.67241	0.000306797
GSE26193	AFF1	6	8	79	10.4364	9.73916	9.61511	0.0048905
GSE14764	AFF1	2	6	68	10.0279	9.71599	9.51437	0.296253
GSE2109	AFF1	9	28	81	9.82915	9.48595	9.48945	0.321413
GSE30161	AFF1	5	1	47	8.38738	7.01333	7.89352	0.336503
GSE44104	AFF1	12	11	28	10.2079	9.90576	9.79841	0.575239
GSE9891	AFF1	NA	20	246	NA	9.60995	9.61348	0.896595
GSE26193	AGER	6	8	79	4.99385	5.01166	5.21091	0.0262493
GSE9891	AGER	NA	20	246	NA	5.3381	5.41297	0.237301
GSE51088	AGER	3	6	100	0.0550833	0.014915	0.0688201	0.291522
GSE2109	AGER	9	28	81	5.76978	5.57906	5.66229	0.449601
GSE44104	AGER	12	11	28	5.17541	5.11442	5.23476	0.597239
GSE30161	AGER	5	1	47	7.93814	8.51676	8.02229	0.614688
GSE6008	AGER	8	37	41	6.6465	6.75583	6.70671	0.66833
GSE14764	AGER	2	6	68	6.68427	6.69398	6.75658	0.977559
GSE44104	AHCY	12	11	28	10.6804	10.0338	10.438	0.0193315
GSE6008	AHCY	8	37	41	10.9772	10.8282	10.6451	0.0557366
GSE2109	AHCY	9	28	81	9.62535	9.70367	9.90631	0.244991
GSE14764	AHCY	2	6	68	10.8813	10.2811	10.3098	0.412146
GSE26193	AHCY	6	8	79	10.1611	9.82917	10.0527	0.561815
GSE30161	AHCY	5	1	47	7.11585	6.58657	7.11887	0.694461
GSE9891	AHCY	NA	20	246	NA	9.9515	9.89252	0.832444
GSE51088	AIF1	3	6	100	0.0361233	-0.23369	0.0355604	0.0776951
GSE26193	AIF1	6	8	79	8.1201	7.6607	8.27685	0.10344
GSE2109	AIF1	9	28	81	8.43179	8.05063	8.23317	0.120667
GSE9891	AIF1	NA	20	246	NA	8.24449	8.49457	0.15722
GSE14764	AIF1	2	6	68	8.93158	9.34182	9.42463	0.585266
GSE30161	AIF1	5	1	47	7.36098	6.83222	6.82263	0.676749
GSE6008	AIF1	8	37	41	8.90317	8.96706	9	0.766522
GSE44104	AIF1	12	11	28	7.79381	7.80542	7.83589	0.952524
GSE2109	AKT1S1	9	28	81	7.18594	6.72279	6.60941	0.180196
GSE44104	AKT1S1	12	11	28	7.44906	7.07877	7.28039	0.213371
GSE30161	AKT1S1	5	1	47	6.3707	5.12578	5.92042	0.366716
GSE9891	AKT1S1	NA	20	246	NA	6.83522	6.80824	0.598959
GSE26193	AKT1S1	6	8	79	7.98455	7.55922	7.64629	0.647564
GSE44104	AKT2	12	11	28	8.6486	8.15054	8.39057	0.00221998
GSE30161	AKT2	5	1	47	10.0304	10.5046	9.48862	0.0141181
GSE26193	AKT2	6	8	79	8.52314	8.0029	8.37635	0.084563
GSE6008	AKT2	8	37	41	5.91352	5.87108	5.97897	0.0962834
GSE2109	AKT2	9	28	81	8.63167	8.25298	8.3377	0.116754
GSE9891	AKT2	NA	20	246	NA	7.98506	8.17588	0.219787
GSE51088	AKT2	3	6	100	-0.03792	-0.102883	-0.106704	0.767228
GSE14764	AKT2	2	6	68	6.16917	5.98401	5.99334	0.873047
GSE6008	ALG12	8	37	41	8.05394	7.37627	7.19924	5.03e-06
GSE2109	ALG12	9	28	81	6.99931	6.74159	6.57639	0.00231174
GSE44104	ALG12	12	11	28	6.57069	6.34418	6.08198	0.00460703
GSE26193	ALG12	6	8	79	6.93727	6.54506	6.3216	0.0058917
GSE9891	ALG12	NA	20	246	NA	6.57965	6.40853	0.0277849
GSE30161	ALG12	5	1	47	7.35832	6.72606	6.95054	0.0747782
GSE51088	ALG12	3	6	100	0.101527	0.0670883	0.0618601	0.441013
GSE14764	ALG12	2	6	68	7.57417	7.41568	7.51233	0.761377
GSE44104	ALG3	12	11	28	7.81094	7.2649	7.89001	0.000727254
GSE26193	ALG3	6	8	79	7.75405	7.40733	7.95883	0.022761
GSE6008	ALG3	8	37	41	9.23981	8.98844	9.25594	0.0307717
GSE2109	ALG3	9	28	81	7.45681	7.61994	7.77175	0.221949
GSE14764	ALG3	2	6	68	9.62741	9.18977	9.48369	0.26732
GSE30161	ALG3	5	1	47	6.90636	5.76852	6.58806	0.31032
GSE9891	ALG3	NA	20	246	NA	7.95195	7.92394	0.823024
GSE26193	ALG5	6	8	79	9.72778	9.99089	9.34952	0.000531483
GSE2109	ALG5	9	28	81	9.48155	9.64649	9.29381	0.0279383
GSE44104	ALG5	12	11	28	9.70148	10.0551	9.7509	0.050049
GSE6008	ALG5	8	37	41	9.80741	9.61329	9.52716	0.261021
GSE51088	ALG5	3	6	100	0.0354233	0.0537017	-0.030015	0.267919
GSE14764	ALG5	2	6	68	9.05389	9.46663	9.18568	0.356786
GSE9891	ALG5	NA	20	246	NA	9.51122	9.42	0.549549
GSE30161	ALG5	5	1	47	5.20569	4.65362	5.16663	0.578105
GSE44104	ALPPL2	12	11	28	5.61287	6.45022	5.711	0.0275991
GSE26193	ALPPL2	6	8	79	5.42336	5.71247	5.88877	0.190184
GSE9891	ALPPL2	NA	20	246	NA	5.976	5.90787	0.207546
GSE30161	ALPPL2	5	1	47	7.61359	7.59822	7.29813	0.422452
GSE2109	ALPPL2	9	28	81	6.09335	6.83414	6.36047	0.570893
GSE14764	ALPPL2	2	6	68	6.96073	7.02723	7.01846	0.873473
GSE6008	ALPPL2	8	37	41	7.07795	7.35149	7.20301	0.956396
GSE9891	AMDHD1	NA	20	246	NA	3.83514	3.54164	0.320042
GSE2109	AMDHD1	9	28	81	3.5868	3.76612	3.62266	0.384687
GSE44104	AMDHD1	12	11	28	3.79483	3.64142	3.62366	0.631492
GSE30161	AMDHD1	5	1	47	3.8319	3.99811	3.94698	0.757313
GSE26193	AMDHD1	6	8	79	3.51608	3.56263	3.57334	0.823818
GSE6008	ANK1	8	37	41	7.95721	7.48264	7.52769	0.00821438
GSE9891	ANK1	NA	20	246	NA	5.25944	5.17159	0.098279
GSE26193	ANK1	6	8	79	5.28322	5.37339	5.19155	0.14876
GSE30161	ANK1	5	1	47	5.53776	5.70656	5.1141	0.189674
GSE51088	ANK1	3	6	100	0.120353	-0.00681167	-0.0286756	0.232435
GSE44104	ANK1	12	11	28	5.66885	5.17424	5.26403	0.253832
GSE2109	ANK1	9	28	81	5.5817	5.52799	5.4455	0.389357
GSE14764	ANK1	2	6	68	8.4584	7.78083	7.69457	0.633729
GSE44104	ANKRD11	12	11	28	8.96078	9.20096	8.98962	0.0683005
GSE2109	ANKRD11	9	28	81	8.79719	8.95164	8.79492	0.117418
GSE51088	ANKRD11	3	6	100	0.0196533	0.0173683	-0.0670242	0.191694
GSE6008	ANKRD11	8	37	41	7.02234	7.25657	7.26466	0.37323
GSE30161	ANKRD11	5	1	47	7.0642	5.85499	6.97833	0.423546
GSE14764	ANKRD11	2	6	68	7.40384	7.44053	7.21959	0.524613
GSE9891	ANKRD11	NA	20	246	NA	8.83872	8.79238	0.628681
GSE26193	ANKRD11	6	8	79	8.83501	8.70528	8.8283	0.689199
GSE2109	ANKRD2	9	28	81	5.73827	5.23094	5.36115	0.0157578
GSE44104	ANKRD2	12	11	28	5.50748	5.19568	5.18576	0.0741355
GSE14764	ANKRD2	2	6	68	6.55828	6.45716	6.68502	0.175841
GSE26193	ANKRD2	6	8	79	5.22345	5.05251	5.29283	0.307074
GSE9891	ANKRD2	NA	20	246	NA	5.28066	5.35153	0.533537
GSE30161	ANKRD2	5	1	47	6.61184	7.09748	6.70282	0.657281
GSE6008	ANKRD2	8	37	41	6.8465	6.70278	6.71667	0.70569
GSE44104	ANKRD35	12	11	28	5.83249	6.08834	4.93301	6.36e-05
GSE26193	ANKRD35	6	8	79	5.75682	6.30759	5.3826	0.0154643
GSE30161	ANKRD35	5	1	47	6.02778	6.60749	5.66475	0.12695
GSE51088	ANKRD35	3	6	100	-0.0796033	0.0604533	-0.166852	0.132167
GSE9891	ANKRD35	NA	20	246	NA	5.18657	5.3216	0.364554
GSE2109	ANKRD35	9	28	81	5.58336	5.74393	5.4974	0.373932
GSE9891	ANKRD36BP2	NA	20	246	NA	3.38408	4.11357	0.000110792
GSE2109	ANKRD36BP2	9	28	81	3.86379	3.29939	3.80017	0.00144738
GSE30161	ANKRD36BP2	5	1	47	3.64455	3.65195	4.33101	0.318624
GSE26193	ANKRD36BP2	6	8	79	3.66914	4.08165	3.53775	0.796944
GSE44104	ANKRD36BP2	12	11	28	3.98154	3.92439	3.82611	0.938763
GSE44104	ANKS3	12	11	28	6.59161	6.3445	6.1744	0.000752887
GSE26193	ANKS3	6	8	79	6.6089	6.22817	6.22155	0.0166135
GSE2109	ANKS3	9	28	81	6.5066	6.3383	6.37652	0.218876
GSE30161	ANKS3	5	1	47	7.3999	7.46835	7.25439	0.35352
GSE9891	ANKS3	NA	20	246	NA	6.42108	6.42386	0.73498
GSE6008	ANXA4	8	37	41	12.9695	10.0659	9.79808	8.05e-06
GSE2109	ANXA4	9	28	81	11.8727	10.3002	9.60832	1.67e-05
GSE44104	ANXA4	12	11	28	11.942	10.9315	9.96586	9.52e-05
GSE26193	ANXA4	6	8	79	12.3814	9.79522	10.0034	0.00293125
GSE14764	ANXA4	2	6	68	12.4599	10.0244	9.52851	0.0104474
GSE9891	ANXA4	NA	20	246	NA	10.1085	9.69182	0.0341154
GSE51088	ANXA4	3	6	100	0.305387	0.0727733	-0.209088	0.0906494
GSE30161	ANXA4	5	1	47	8.98283	6.64244	7.39166	0.14054
GSE6008	ANXA5	8	37	41	11.0097	11.0521	10.7351	0.030339
GSE2109	ANXA5	9	28	81	10.4895	10.1038	9.94124	0.0524456
GSE26193	ANXA5	6	8	79	10.6201	10.4535	10.1529	0.0720201
GSE30161	ANXA5	5	1	47	7.20963	4.98512	6.34478	0.0924467
GSE44104	ANXA5	12	11	28	10.9601	10.5705	10.6591	0.254392
GSE51088	ANXA5	3	6	100	-0.09133	0.0141867	-0.0196041	0.470405
GSE14764	ANXA5	2	6	68	11.15	10.8477	10.7939	0.765594
GSE9891	ANXA5	NA	20	246	NA	10.1255	10.1841	0.771701
GSE2109	ANXA7	9	28	81	10.4305	9.85947	9.91975	0.0115449
GSE26193	ANXA7	6	8	79	10.4189	10.3938	10.0991	0.0296474
GSE6008	ANXA7	8	37	41	10.2597	9.8775	9.86764	0.114564
GSE44104	ANXA7	12	11	28	10.5756	10.305	10.4114	0.121047
GSE30161	ANXA7	5	1	47	7.27307	5.8992	7.40993	0.364466
GSE14764	ANXA7	2	6	68	10.2442	10.0818	9.95509	0.482252
GSE9891	ANXA7	NA	20	246	NA	10.2275	10.195	0.541514
GSE6008	AP2A2	8	37	41	10.7878	9.19091	8.96533	6.87e-07
GSE26193	AP2A2	6	8	79	10.0597	8.62625	8.33317	0.000250426
GSE44104	AP2A2	12	11	28	9.42256	8.46966	8.35146	0.000492273
GSE30161	AP2A2	5	1	47	6.43623	5.56992	5.95982	0.031231
GSE14764	AP2A2	2	6	68	10.4747	9.41367	9.23802	0.0390413
GSE2109	AP2A2	9	28	81	8.72451	8.23139	8.14719	0.179284
GSE9891	AP2A2	NA	20	246	NA	8.37374	8.27303	0.746394
GSE44104	AP5B1	12	11	28	5.14391	5.26069	5.10523	0.199939
GSE26193	AP5B1	6	8	79	5.94202	5.74594	5.60146	0.260042
GSE30161	AP5B1	5	1	47	5.7782	5.80118	5.25501	0.510868
GSE2109	AP5B1	9	28	81	5.47077	5.4369	5.39539	0.830198
GSE9891	AP5B1	NA	20	246	NA	5.63839	5.67547	0.837163
GSE44104	APCDD1L	12	11	28	5.38881	5.16593	5.42044	0.029683
GSE30161	APCDD1L	5	1	47	5.39043	4.94914	5.65255	0.161611
GSE26193	APCDD1L	6	8	79	5.41003	5.15941	5.34341	0.262441
GSE9891	APCDD1L	NA	20	246	NA	5.42405	5.37469	0.327452
GSE2109	APCDD1L	9	28	81	5.57469	5.54201	5.49133	0.453838
GSE30161	APCDD1L-AS1	5	1	47	6.02737	5.92963	5.62435	0.0706788
GSE2109	APCDD1L-AS1	9	28	81	7.25205	7.00369	7.05292	0.152498
GSE44104	APCDD1L-AS1	12	11	28	6.33134	6.21767	6.43545	0.164244
GSE9891	APCDD1L-AS1	NA	20	246	NA	6.70724	6.66913	0.460839
GSE26193	APCDD1L-AS1	6	8	79	6.65099	6.55594	6.64147	0.538956
GSE6008	APLP2	8	37	41	11.7573	11.3432	11.4292	0.0686129
GSE2109	APLP2	9	28	81	10.5433	10.067	10.2359	0.0713742
GSE51088	APLP2	3	6	100	0.01652	0.0749267	-0.0486828	0.0999786
GSE26193	APLP2	6	8	79	10.7315	10.1579	10.3621	0.191566
GSE14764	APLP2	2	6	68	11.5832	10.8644	11.1121	0.212808
GSE44104	APLP2	12	11	28	11.1625	10.8403	10.7221	0.230301
GSE30161	APLP2	5	1	47	10.9479	9.564	10.1607	0.25643
GSE9891	APLP2	NA	20	246	NA	10.3641	10.4406	0.774014
GSE6008	APOB	8	37	41	5.29544	5.19513	5.11279	5.49e-05
GSE51088	APOB	3	6	100	-0.04003	0.0599217	-0.00749434	0.0380653
GSE9891	APOB	NA	20	246	NA	4.4344	4.00616	0.184563
GSE14764	APOB	2	6	68	5.48708	5.54508	5.34647	0.193321
GSE30161	APOB	5	1	47	4.68712	4.12852	4.51269	0.220921
GSE26193	APOB	6	8	79	4.10701	4.05044	3.99026	0.423147
GSE44104	APOB	12	11	28	4.26499	4.06609	4.01341	0.497116
GSE2109	APOB	9	28	81	4.01587	4.07256	4.10771	0.67158
GSE26193	APOBR	6	8	79	5.16813	5.1003	5.28925	0.136871
GSE44104	APOBR	12	11	28	5.2474	5.36641	5.38697	0.295568
GSE30161	APOBR	5	1	47	5.92339	6.94083	6.10892	0.371583
GSE6008	APOBR	8	37	41	6.68335	6.75237	6.76167	0.42286
GSE2109	APOBR	9	28	81	5.42831	5.33381	5.34515	0.491457
GSE9891	APOBR	NA	20	246	NA	5.30878	5.31884	0.915754
GSE14764	APOBR	2	6	68	6.6778	6.84239	6.72951	0.932313
GSE26193	APOC1	6	8	79	8.35899	7.20472	8.36896	0.0477805
GSE2109	APOC1	9	28	81	8.62571	8.25427	8.68112	0.12479
GSE14764	APOC1	2	6	68	8.26461	9.24139	9.39281	0.206129
GSE6008	APOC1	8	37	41	8.493	8.89717	9.0163	0.344585
GSE30161	APOC1	5	1	47	7.64288	7.21953	7.24775	0.603398
GSE9891	APOC1	NA	20	246	NA	8.75234	8.77409	0.963839
GSE44104	APOC1	12	11	28	8.94836	8.88821	8.83771	0.971604
GSE6008	APOL1	8	37	41	11.3076	8.94886	9.11285	6.55e-05
GSE14764	APOL1	2	6	68	9.95055	8.09938	9.03057	0.0112323
GSE26193	APOL1	6	8	79	9.1059	7.16941	8.47735	0.0177598
GSE2109	APOL1	9	28	81	9.68323	8.23966	8.45671	0.0305037
GSE30161	APOL1	5	1	47	8.17918	6.73978	7.30115	0.089343
GSE44104	APOL1	12	11	28	8.85472	9.37885	8.58938	0.221299
GSE9891	APOL1	NA	20	246	NA	8.02256	8.3845	0.243353
GSE6008	ARHGAP1	8	37	41	11.3353	10.5641	10.547	0.00819904
GSE26193	ARHGAP1	6	8	79	10.808	10.2748	10.4307	0.0602875
GSE44104	ARHGAP1	12	11	28	10.9432	10.8477	10.5784	0.117386
GSE2109	ARHGAP1	9	28	81	10.5491	10.3303	10.2583	0.153476
GSE30161	ARHGAP1	5	1	47	9.69028	7.35484	9.23042	0.207562
GSE14764	ARHGAP1	2	6	68	11.0313	10.7548	10.4975	0.260618
GSE51088	ARHGAP1	3	6	100	0.0102833	0.097478	-0.0139203	0.288289
GSE9891	ARHGAP1	NA	20	246	NA	10.2891	10.1818	0.294282
GSE44104	ARHGAP33	12	11	28	6.05471	6.00444	6.27265	0.0232869
GSE9891	ARHGAP33	NA	20	246	NA	6.25284	6.47276	0.0343718
GSE26193	ARHGAP33	6	8	79	6.55637	6.54283	6.85594	0.0444887
GSE6008	ARHGAP33	8	37	41	7.96186	7.9138	8.02662	0.0683049
GSE14764	ARHGAP33	2	6	68	7.67518	7.8904	7.95543	0.249478
GSE51088	ARHGAP33	3	6	100	0.0592067	0.00842	0.0550469	0.300127
GSE2109	ARHGAP33	9	28	81	6.70451	6.656	6.7572	0.510777
GSE30161	ARHGAP33	5	1	47	8.66466	7.44132	8.28468	0.693495
GSE6008	ARHGEF1	8	37	41	8.17756	7.91592	8.07873	0.00272801
GSE9891	ARHGEF1	NA	20	246	NA	6.93902	7.1283	0.00640666
GSE44104	ARHGEF1	12	11	28	6.7268	6.34347	6.45137	0.00963814
GSE26193	ARHGEF1	6	8	79	7.13814	6.7971	7.00325	0.239915
GSE30161	ARHGEF1	5	1	47	7.56563	7.59752	7.30446	0.522184
GSE2109	ARHGEF1	9	28	81	7.41293	7.29318	7.24776	0.568855
GSE14764	ARHGEF1	2	6	68	8.20361	8.27308	8.33483	0.891336
GSE6008	ARHGEF38	8	37	41	7.31012	7.12956	7.10313	0.0178796
GSE9891	ARHGEF38	NA	20	246	NA	4.47127	4.35559	0.0247267
GSE2109	ARHGEF38	9	28	81	4.63269	4.58836	4.52359	0.0625438
GSE14764	ARHGEF38	2	6	68	7.28769	7.11602	6.86003	0.146135
GSE26193	ARHGEF38	6	8	79	4.50176	4.48304	4.43126	0.364283
GSE44104	ARHGEF38	12	11	28	4.38627	4.3244	4.41615	0.374246
GSE30161	ARHGEF38	5	1	47	4.4299	3.96936	4.34168	0.448272
GSE51088	ARHGEF38	3	6	100	0.06381	0.086975	0.0767259	0.652117
GSE51088	ARRB2	3	6	100	-0.0237133	-0.052775	0.0850635	0.00047547
GSE6008	ARRB2	8	37	41	7.96582	8.35525	8.42582	0.00153021
GSE44104	ARRB2	12	11	28	6.45609	6.21427	6.7509	0.00251053
GSE14764	ARRB2	2	6	68	7.8119	8.18818	8.39652	0.0189887
GSE2109	ARRB2	9	28	81	7.17885	6.9381	7.16079	0.122917
GSE26193	ARRB2	6	8	79	6.93978	6.87381	7.19075	0.135241
GSE9891	ARRB2	NA	20	246	NA	7.11984	7.29178	0.264736
GSE30161	ARRB2	5	1	47	6.51512	6.66916	6.40015	0.784209
GSE9891	ASCL5	NA	20	246	NA	4.79655	4.04103	0.0120179
GSE44104	ASCL5	12	11	28	4.13649	4.27339	4.12623	0.0888812
GSE26193	ASCL5	6	8	79	3.90582	4.78119	3.93963	0.11732
GSE2109	ASCL5	9	28	81	4.02036	4.46213	4.12333	0.127208
GSE30161	ASCL5	5	1	47	5.01591	5.06918	4.68483	0.343418
GSE44104	ASL	12	11	28	8.58569	8.1284	7.66578	3.29e-05
GSE26193	ASL	6	8	79	8.73133	7.75688	7.81887	0.00868672
GSE2109	ASL	9	28	81	8.28373	7.71397	7.58622	0.0591032
GSE51088	ASL	3	6	100	0.0952233	0.0848967	-0.0154997	0.0638898
GSE30161	ASL	5	1	47	6.7255	5.78659	6.2109	0.0729504
GSE14764	ASL	2	6	68	8.88673	7.83559	8.05025	0.102111
GSE6008	ASL	8	37	41	8.36914	7.76865	7.927	0.115602
GSE9891	ASL	NA	20	246	NA	8.01122	7.63237	0.128443
GSE6008	ASNA1	8	37	41	8.67222	9.06589	9.11099	0.0540633
GSE30161	ASNA1	5	1	47	6.43211	6.64475	5.99289	0.092855
GSE44104	ASNA1	12	11	28	8.53181	8.34549	8.1858	0.146559
GSE9891	ASNA1	NA	20	246	NA	8.70394	8.5678	0.197905
GSE14764	ASNA1	2	6	68	9.0185	9.33121	9.35917	0.368331
GSE2109	ASNA1	9	28	81	8.06912	8.1652	8.16845	0.750895
GSE51088	ASNA1	3	6	100	-0.04506	-0.000796667	-0.0045094	0.757517
GSE26193	ASNA1	6	8	79	8.56323	8.62732	8.67919	0.890708
GSE44104	ASPRV1	12	11	28	5.46434	5.44293	5.71399	0.0277993
GSE26193	ASPRV1	6	8	79	5.39843	5.7567	5.63705	0.255699
GSE2109	ASPRV1	9	28	81	5.74956	5.95111	5.8963	0.438625
GSE9891	ASPRV1	NA	20	246	NA	5.59147	5.68415	0.462678
GSE30161	ASPRV1	5	1	47	5.87691	6.07733	5.97657	0.851712
GSE51088	ASPRV1	3	6	100	-0.0892933	-0.116832	-0.103929	0.96606
GSE26193	ATF3	6	8	79	9.14263	6.76004	8.27898	0.00226757
GSE9891	ATF3	NA	20	246	NA	7.44456	8.22534	0.0193178
GSE2109	ATF3	9	28	81	7.49379	7.0171	7.6967	0.0387689
GSE51088	ATF3	3	6	100	-0.481223	-0.578583	-0.187315	0.0639505
GSE6008	ATF3	8	37	41	9.05114	8.3842	8.67731	0.117679
GSE14764	ATF3	2	6	68	8.44659	7.48783	8.65364	0.155736
GSE44104	ATF3	12	11	28	8.37394	7.82445	8.49248	0.351022
GSE30161	ATF3	5	1	47	7.70399	6.2676	7.25895	0.476273
GSE30161	ATF5	5	1	47	8.95915	9.75741	8.89612	0.180915
GSE26193	ATF5	6	8	79	5.9751	5.79844	5.98953	0.199678
GSE9891	ATF5	NA	20	246	NA	6.28597	6.21636	0.318574
GSE44104	ATF5	12	11	28	6.09475	5.98201	6.01967	0.553691
GSE2109	ATF5	9	28	81	6.80243	6.63189	6.77132	0.57123
GSE51088	ATIC	3	6	100	0.0396467	0.07382	0.0251067	0.725859
GSE6008	ATP11A	8	37	41	8.28357	6.97703	6.84288	3.56e-05
GSE44104	ATP11A	12	11	28	9.7165	9.46149	8.14518	0.00232976
GSE2109	ATP11A	9	28	81	8.78933	8.132	7.30321	0.0035704
GSE26193	ATP11A	6	8	79	9.82994	7.99896	7.6489	0.0135243
GSE14764	ATP11A	2	6	68	8.81619	6.98273	6.95284	0.0498199
GSE30161	ATP11A	5	1	47	5.81372	4.07915	4.98354	0.252846
GSE9891	ATP11A	NA	20	246	NA	7.44259	7.32496	0.586419
GSE26193	ATP1A2	6	8	79	4.77749	5.80293	4.31537	0.0166279
GSE44104	ATP1A2	12	11	28	4.47178	6.69316	4.38709	0.158712
GSE2109	ATP1A2	9	28	81	4.21036	5.0513	4.74919	0.368866
GSE6008	ATP1A2	8	37	41	6.10289	6.35639	6.02175	0.467481
GSE9891	ATP1A2	NA	20	246	NA	5.001	4.69207	0.694384
GSE14764	ATP1A2	2	6	68	6.31075	6.33162	6.28903	0.747646
GSE51088	ATP1A2	3	6	100	-0.660177	-0.062495	-0.499753	0.805432
GSE30161	ATP1A2	5	1	47	4.90468	5.08693	5.09888	0.880451
GSE51088	ATP1A4	3	6	100	0.116247	0.157223	-0.0048273	0.00530664
GSE2109	ATP1A4	9	28	81	4.02695	4.14167	4.00763	0.411962
GSE30161	ATP1A4	5	1	47	4.25723	4.48012	4.38032	0.654309
GSE26193	ATP1A4	6	8	79	3.91066	4.04099	3.95827	0.799187
GSE9891	ATP1A4	NA	20	246	NA	3.96927	3.96724	0.898987
GSE44104	ATP1A4	12	11	28	4.05972	4.80013	4.07699	0.980401
GSE44104	ATP1B2	12	11	28	4.9741	4.85292	5.26668	0.0591953
GSE9891	ATP1B2	NA	20	246	NA	5.33244	5.25748	0.126181
GSE6008	ATP1B2	8	37	41	7.41296	7.33106	7.29914	0.18567
GSE26193	ATP1B2	6	8	79	5.00305	5.27197	5.16368	0.336512
GSE30161	ATP1B2	5	1	47	4.9469	5.21064	5.11975	0.523546
GSE2109	ATP1B2	9	28	81	5.78997	5.68455	5.6893	0.648841
GSE14764	ATP1B2	2	6	68	7.26069	7.20465	7.29917	0.712175
GSE6008	ATP5B	8	37	41	11.3522	11.4987	11.841	0.0129776
GSE30161	ATP5B	5	1	47	5.85751	6.07845	6.282	0.421593
GSE2109	ATP5B	9	28	81	11.1315	11.1729	11.2527	0.677095
GSE26193	ATP5B	6	8	79	11.4405	11.4912	11.5243	0.694144
GSE44104	ATP5B	12	11	28	11.2718	11.3087	11.3582	0.788919
GSE9891	ATP5B	NA	20	246	NA	11.5202	11.5458	0.896595
GSE14764	ATP5B	2	6	68	11.7106	11.5825	11.6514	0.932243
GSE51088	ATP5B	3	6	100	-0.111887	-0.10524	-0.102616	0.986904
GSE51088	ATP5J	3	6	100	0.01105	0.0805017	0.133683	0.238885
GSE9891	ATP5J	NA	20	246	NA	11.0558	11.1569	0.266033
GSE30161	ATP5J	5	1	47	7.64925	6.60187	8.00819	0.358826
GSE6008	ATP5J	8	37	41	10.8717	10.7782	10.8664	0.493458
GSE26193	ATP5J	6	8	79	11.1207	10.8043	10.9716	0.565512
GSE44104	ATP5J	12	11	28	11.1593	11.1926	11.2363	0.83299
GSE2109	ATP5J	9	28	81	10.8141	10.7872	10.8358	0.883209
GSE14764	ATP5J	2	6	68	10.9418	10.8609	10.9353	0.977559
GSE6008	ATP5O	8	37	41	10.9336	11.3875	11.4129	0.0591769
GSE2109	ATP5O	9	28	81	11.2179	11.5192	11.3803	0.123385
GSE26193	ATP5O	6	8	79	11.5189	11.3459	11.6533	0.15211
GSE51088	ATP5O	3	6	100	-0.10897	-0.0768517	0.0047253	0.156425
GSE44104	ATP5O	12	11	28	11.4968	11.5543	11.6543	0.263025
GSE9891	ATP5O	NA	20	246	NA	11.6042	11.7332	0.264736
GSE30161	ATP5O	5	1	47	8.52697	7.02129	8.79982	0.299218
GSE14764	ATP5O	2	6	68	11.3156	11.5744	11.6714	0.41321
GSE6008	ATP6V0A1	8	37	41	9.59185	8.85164	8.61723	1.26e-05
GSE26193	ATP6V0A1	6	8	79	8.32561	8.20485	7.63722	2.46e-05
GSE2109	ATP6V0A1	9	28	81	8.14383	7.87893	7.62979	0.000183452
GSE44104	ATP6V0A1	12	11	28	7.7952	7.45637	7.44289	0.0273902
GSE14764	ATP6V0A1	2	6	68	8.96158	8.57049	8.48037	0.0434665
GSE30161	ATP6V0A1	5	1	47	7.69764	6.94944	7.40866	0.162287
GSE9891	ATP6V0A1	NA	20	246	NA	7.53806	7.51059	0.987943
GSE6008	ATP6V0E1	8	37	41	12.303	11.541	11.4682	0.000657772
GSE26193	ATP6V0E1	6	8	79	11.4714	10.7395	10.7424	0.0138193
GSE51088	ATP6V0E1	3	6	100	0.267977	0.135295	0.016463	0.0274978
GSE44104	ATP6V0E1	12	11	28	11.7109	11.1515	11.2716	0.0502184
GSE14764	ATP6V0E1	2	6	68	12.3271	11.5616	11.6287	0.0678891
GSE2109	ATP6V0E1	9	28	81	11.3331	10.8947	10.8849	0.0714685
GSE30161	ATP6V0E1	5	1	47	11.0516	8.42866	10.3089	0.130799
GSE9891	ATP6V0E1	NA	20	246	NA	10.9816	10.9006	0.574002
GSE6008	ATP6V1A	8	37	41	11.5076	10.4289	10.4995	0.000363893
GSE44104	ATP6V1A	12	11	28	10.7915	10.0511	10.1616	0.0245012
GSE26193	ATP6V1A	6	8	79	10.6454	10.145	10.0838	0.0304098
GSE14764	ATP6V1A	2	6	68	10.9422	10.037	10.0783	0.0847235
GSE2109	ATP6V1A	9	28	81	10.4386	9.92121	9.89315	0.111585
GSE9891	ATP6V1A	NA	20	246	NA	10.031	10.1171	0.131509
GSE30161	ATP6V1A	5	1	47	7.66763	4.21616	7.44742	0.313963
GSE26193	ATP6V1H	6	8	79	9.12668	8.85282	8.75166	0.0486303
GSE6008	ATP6V1H	8	37	41	9.26045	9.1585	8.85629	0.0507429
GSE44104	ATP6V1H	12	11	28	9.49699	9.16105	9.0268	0.0940874
GSE14764	ATP6V1H	2	6	68	9.36449	8.39821	8.58491	0.107701
GSE2109	ATP6V1H	9	28	81	8.99995	8.652	8.65324	0.221062
GSE9891	ATP6V1H	NA	20	246	NA	8.83621	8.77923	0.42492
GSE30161	ATP6V1H	5	1	47	5.83771	6.35906	5.78454	0.47439
GSE9891	ATPIF1	NA	20	246	NA	10.875	11.0072	0.216398
GSE51088	ATPIF1	3	6	100	0.0356733	0.185677	-0.00646849	0.285787
GSE6008	ATPIF1	8	37	41	9.7897	9.74255	9.52685	0.374777
GSE30161	ATPIF1	5	1	47	10.6612	8.23284	10.5664	0.492854
GSE26193	ATPIF1	6	8	79	11.1159	10.9846	10.9144	0.584135
GSE44104	ATPIF1	12	11	28	11.2092	11.1048	11.1548	0.650322
GSE2109	ATPIF1	9	28	81	10.8437	10.8815	10.8204	0.663869
GSE14764	ATPIF1	2	6	68	9.88167	9.51847	9.61822	0.803374
GSE26193	ATXN10	6	8	79	10.626	10.6256	10.3468	0.0400622
GSE2109	ATXN10	9	28	81	10.3666	10.2685	10.0927	0.160698
GSE9891	ATXN10	NA	20	246	NA	10.2942	10.2475	0.448078
GSE6008	ATXN10	8	37	41	10.4468	10.4416	10.5472	0.533234
GSE14764	ATXN10	2	6	68	10.6043	10.5447	10.4282	0.618285
GSE30161	ATXN10	5	1	47	7.16028	5.973	6.95911	0.682326
GSE44104	ATXN10	12	11	28	10.3883	10.4971	10.4362	0.887355
GSE51088	ATXN2	3	6	100	0.084	0.0402267	0.0197103	0.621051
GSE6008	AVPI1	8	37	41	9.96473	8.5876	8.62404	5.32e-05
GSE2109	AVPI1	9	28	81	7.77767	7.14628	7.09024	0.00177638
GSE14764	AVPI1	2	6	68	9.95529	8.94965	8.67775	0.020213
GSE44104	AVPI1	12	11	28	8.14718	7.30583	7.69336	0.0209734
GSE26193	AVPI1	6	8	79	8.50741	7.17489	7.16718	0.0408381
GSE30161	AVPI1	5	1	47	6.24031	5.01173	5.60747	0.17236
GSE9891	AVPI1	NA	20	246	NA	6.97977	7.06921	0.511913
GSE51088	AVPI1	3	6	100	-0.0722967	-0.0641383	-0.109513	0.779661
GSE6008	B4GALT1	8	37	41	10.0541	8.81624	8.97859	0.00210181
GSE30161	B4GALT1	5	1	47	8.69685	6.80005	7.59301	0.00453568
GSE26193	B4GALT1	6	8	79	6.68714	6.92692	7.12552	0.0209394
GSE44104	B4GALT1	12	11	28	10.0097	9.67342	9.45337	0.128948
GSE2109	B4GALT1	9	28	81	7.33526	7.80948	7.74565	0.157889
GSE51088	B4GALT1	3	6	100	0.0822767	0.00990833	-0.0096195	0.606961
GSE14764	B4GALT1	2	6	68	7.73789	7.88526	7.75397	0.757819
GSE9891	B4GALT1	NA	20	246	NA	7.61983	7.58441	0.76939
GSE2109	BAG1	9	28	81	7.99455	8.43002	8.17439	0.0642992
GSE44104	BAG1	12	11	28	8.48983	8.85266	8.93542	0.121271
GSE14764	BAG1	2	6	68	8.62481	8.99544	9.19245	0.214872
GSE6008	BAG1	8	37	41	8.64805	8.7372	8.86803	0.402296
GSE30161	BAG1	5	1	47	6.63278	6.9644	7.02733	0.615247
GSE51088	BAG1	3	6	100	-0.108057	-0.0517633	-0.11225	0.75862
GSE26193	BAG1	6	8	79	8.49686	8.62831	8.54919	0.833703
GSE9891	BAG1	NA	20	246	NA	8.45066	8.43669	0.985532
GSE44104	BAK1	12	11	28	7.93688	7.54401	7.7848	0.00868774
GSE26193	BAK1	6	8	79	7.35462	6.88643	7.39294	0.0125242
GSE6008	BAK1	8	37	41	8.43999	8.05171	8.17078	0.025173
GSE2109	BAK1	9	28	81	7.00246	6.93519	7.20456	0.0400384
GSE14764	BAK1	2	6	68	8.28576	7.89003	8.01424	0.231893
GSE30161	BAK1	5	1	47	9.53013	9.45512	9.16706	0.386956
GSE9891	BAK1	NA	20	246	NA	7.22764	7.19185	0.844253
GSE30161	BARX2	5	1	47	6.98905	7.70138	7.05459	0.332968
GSE51088	BARX2	3	6	100	0.00179333	-0.0116233	0.0221438	0.398534
GSE2109	BARX2	9	28	81	5.43761	5.58373	5.59669	0.430016
GSE6008	BARX2	8	37	41	6.70016	6.74693	6.81906	0.43355
GSE44104	BARX2	12	11	28	5.6271	5.55952	5.81232	0.469324
GSE14764	BARX2	2	6	68	6.87446	6.7093	6.85115	0.535687
GSE9891	BARX2	NA	20	246	NA	5.25709	5.26568	0.744107
GSE26193	BARX2	6	8	79	5.28712	5.31517	5.25293	0.910317
GSE6008	BATF3	8	37	41	8.12457	7.12144	7.13767	0.00141819
GSE26193	BATF3	6	8	79	6.58765	5.7489	5.90143	0.0029169
GSE30161	BATF3	5	1	47	6.25677	5.69334	5.63911	0.0298611
GSE51088	BATF3	3	6	100	0.154787	-0.143872	-0.0168752	0.0404043
GSE44104	BATF3	12	11	28	6.5434	6.23322	6.24785	0.0672779
GSE2109	BATF3	9	28	81	6.46845	6.13276	6.16715	0.135989
GSE14764	BATF3	2	6	68	7.46683	7.19548	7.30793	0.644441
GSE9891	BATF3	NA	20	246	NA	6.06924	6.11454	0.801923
GSE14764	BAX	2	6	68	8.63735	7.81339	7.3689	0.0186081
GSE44104	BAX	12	11	28	8.76452	8.5793	8.14492	0.0194512
GSE26193	BAX	6	8	79	7.14263	7.16155	6.67601	0.0580605
GSE9891	BAX	NA	20	246	NA	6.55237	6.24124	0.152833
GSE2109	BAX	9	28	81	6.68864	6.31716	6.17326	0.26257
GSE51088	BAX	3	6	100	0.204443	-0.0908833	-0.0036351	0.340324
GSE30161	BAX	5	1	47	6.00607	6.49773	5.94718	0.422384
GSE6008	BAX	8	37	41	6.53528	6.49012	6.51171	0.804129
GSE6008	BCAN	8	37	41	8.54358	8.35404	8.3107	0.00211973
GSE44104	BCAN	12	11	28	6.2604	6.12022	6.28201	0.0829349
GSE9891	BCAN	NA	20	246	NA	6.60685	6.53756	0.14351
GSE2109	BCAN	9	28	81	7.07066	6.88349	6.92198	0.277734
GSE30161	BCAN	5	1	47	6.45584	6.12849	6.25469	0.343418
GSE26193	BCAN	6	8	79	6.50719	6.43707	6.43406	0.717224
GSE14764	BCAN	2	6	68	8.57186	8.46464	8.57578	0.770245
GSE9891	BCAP31	NA	20	246	NA	11.0258	10.5251	3.16e-05
GSE6008	BCAP31	8	37	41	11.0505	10.6365	10.8423	0.0274857
GSE2109	BCAP31	9	28	81	10.6217	10.2307	10.2632	0.0989931
GSE26193	BCAP31	6	8	79	10.4083	10.7767	10.6363	0.383593
GSE14764	BCAP31	2	6	68	11.2035	10.7001	10.7676	0.436493
GSE30161	BCAP31	5	1	47	7.06887	7.27526	7.18073	0.925818
GSE44104	BCAP31	12	11	28	10.6742	10.8019	10.7051	0.957934
GSE44104	BCKDK	12	11	28	8.14056	7.91005	7.79596	0.00808636
GSE6008	BCKDK	8	37	41	9.04985	8.76896	8.74671	0.0124295
GSE26193	BCKDK	6	8	79	8.31322	7.86849	7.84583	0.013888
GSE9891	BCKDK	NA	20	246	NA	7.86342	7.7046	0.0545745
GSE51088	BCKDK	3	6	100	0.125057	0.07239	0.0287807	0.154437
GSE2109	BCKDK	9	28	81	8.01316	7.73459	7.6962	0.24731
GSE14764	BCKDK	2	6	68	8.99362	8.8255	8.73659	0.264688
GSE30161	BCKDK	5	1	47	6.39887	6.76116	6.32114	0.645658
GSE30161	BCL2L12	5	1	47	6.50801	6.50241	6.20804	0.198227
GSE2109	BCL2L12	9	28	81	6.12774	5.97012	6.09347	0.205552
GSE44104	BCL2L12	12	11	28	6.79117	6.91479	6.72951	0.478472
GSE9891	BCL2L12	NA	20	246	NA	6.12735	6.24933	0.511913
GSE26193	BCL2L12	6	8	79	6.28482	6.09957	6.19996	0.800845
GSE26193	BCL9L	6	8	79	6.85828	6.82062	7.3941	0.00182415
GSE9891	BCL9L	NA	20	246	NA	6.96779	7.29495	0.0341154
GSE44104	BCL9L	12	11	28	6.99147	6.68831	7.12998	0.102317
GSE30161	BCL9L	5	1	47	8.69435	7.52619	8.4512	0.204638
GSE2109	BCL9L	9	28	81	7.09082	7.07563	7.22445	0.396426
GSE44104	BCS1L	12	11	28	8.2547	8.04221	8.08001	0.0883087
GSE30161	BCS1L	5	1	47	6.28078	6.51524	5.79423	0.205238
GSE9891	BCS1L	NA	20	246	NA	8.0421	7.9712	0.385707
GSE14764	BCS1L	2	6	68	8.69933	8.45397	8.44964	0.466208
GSE26193	BCS1L	6	8	79	7.98142	7.93582	7.85551	0.694146
GSE6008	BCS1L	8	37	41	8.51567	8.44221	8.49434	0.705665
GSE2109	BCS1L	9	28	81	7.63854	7.78582	7.79397	0.774669
GSE26193	BEX5	6	8	79	5.79358	8.54824	6.32498	0.000282864
GSE2109	BEX5	9	28	81	6.28053	7.16316	5.73943	0.0101823
GSE30161	BEX5	5	1	47	3.79134	4.31259	4.42333	0.254693
GSE9891	BEX5	NA	20	246	NA	6.78447	6.34941	0.471936
GSE44104	BEX5	12	11	28	7.00721	7.19809	6.95802	0.527062
GSE6008	BICC1	8	37	41	8.75411	6.15959	6.31719	2.84e-05
GSE9891	BICC1	NA	20	246	NA	5.39127	6.23672	0.0102873
GSE2109	BICC1	9	28	81	6.91939	5.30497	5.80147	0.0127124
GSE26193	BICC1	6	8	79	7.73946	5.20237	6.03279	0.0445602
GSE14764	BICC1	2	6	68	8.60112	6.9265	6.54728	0.0553333
GSE44104	BICC1	12	11	28	7.87683	6.21171	6.65455	0.13662
GSE51088	BICC1	3	6	100	0.1417	0.0400917	0.0257512	0.272337
GSE30161	BICC1	5	1	47	4.25774	3.67465	3.54501	0.370828
GSE44104	BLOC1S3	12	11	28	7.0575	6.68268	6.72209	0.0398476
GSE9891	BLOC1S3	NA	20	246	NA	6.24726	6.15951	0.537518
GSE30161	BLOC1S3	5	1	47	6.49741	5.89204	6.09323	0.586772
GSE26193	BLOC1S3	6	8	79	6.31631	6.45773	6.20572	0.719755
GSE2109	BLOC1S3	9	28	81	6.07117	6.05078	6.04478	0.913209
GSE26193	BLVRA	6	8	79	10.5189	9.7156	9.49631	0.0102546
GSE6008	BLVRA	8	37	41	10.466	10.1081	9.87124	0.0185229
GSE44104	BLVRA	12	11	28	9.94106	9.35316	9.19091	0.0190512
GSE2109	BLVRA	9	28	81	10.0782	9.64477	9.40955	0.0384767
GSE30161	BLVRA	5	1	47	7.21152	5.65365	6.2945	0.0462408
GSE51088	BLVRA	3	6	100	0.170373	-0.02243	-0.0506937	0.0602733
GSE14764	BLVRA	2	6	68	10.973	9.87025	10.1435	0.083054
GSE9891	BLVRA	NA	20	246	NA	9.66976	9.6184	0.470077
GSE6008	BLVRB	8	37	41	9.79148	8.89911	9.24805	0.000264219
GSE2109	BLVRB	9	28	81	9.3695	8.37652	8.38111	0.0112097
GSE44104	BLVRB	12	11	28	9.17314	8.52714	8.54458	0.0197867
GSE30161	BLVRB	5	1	47	7.40604	6.80944	6.8479	0.0553943
GSE9891	BLVRB	NA	20	246	NA	8.56377	8.69679	0.215277
GSE26193	BLVRB	6	8	79	8.9253	8.17285	8.61531	0.225712
GSE14764	BLVRB	2	6	68	9.71113	9.46111	9.31791	0.282764
GSE6008	BMX	8	37	41	6.59602	6.41629	6.30331	0.0168567
GSE51088	BMX	3	6	100	-0.0257133	0.0824417	-0.0414943	0.0416106
GSE9891	BMX	NA	20	246	NA	4.10437	4.0096	0.0541955
GSE2109	BMX	9	28	81	4.24791	4.36386	4.1399	0.055541
GSE44104	BMX	12	11	28	4.65472	4.56239	4.09274	0.0651798
GSE26193	BMX	6	8	79	4.16979	4.08086	3.99108	0.120198
GSE14764	BMX	2	6	68	6.44873	6.35908	6.2623	0.202983
GSE30161	BMX	5	1	47	4.16528	4.91316	4.16351	0.310342
GSE6008	BRD1	8	37	41	8.68052	8.23719	8.02382	0.000963409
GSE51088	BRD1	3	6	100	0.225683	-0.0399533	-0.156441	0.00315841
GSE26193	BRD1	6	8	79	8.12588	8.2212	7.80393	0.0399742
GSE9891	BRD1	NA	20	246	NA	7.70295	7.56348	0.0647923
GSE14764	BRD1	2	6	68	8.71352	8.26022	8.23146	0.202283
GSE44104	BRD1	12	11	28	8.56651	8.96759	8.73431	0.202641
GSE30161	BRD1	5	1	47	7.45738	7.28176	7.05364	0.640952
GSE2109	BRD1	9	28	81	7.40332	7.42524	7.33607	0.796547
GSE51088	BRI3	3	6	100	-0.164967	-0.0986517	-0.0096778	0.0220629
GSE44104	BRI3	12	11	28	10.1744	9.76163	10.1781	0.0801199
GSE2109	BRI3	9	28	81	9.91486	9.5566	9.66503	0.138963
GSE9891	BRI3	NA	20	246	NA	9.75489	9.59031	0.154576
GSE30161	BRI3	5	1	47	7.67462	6.52571	7.57238	0.259241
GSE26193	BRI3	6	8	79	9.6002	9.36101	9.61456	0.281452
GSE9891	BRINP2	NA	20	246	NA	5.15297	4.54067	0.00714651
GSE2109	BRINP2	9	28	81	4.98109	5.36792	4.93303	0.0252364
GSE6008	BRINP2	8	37	41	6.25944	6.40789	6.18159	0.0840692
GSE26193	BRINP2	6	8	79	4.76578	4.6711	4.59813	0.248207
GSE44104	BRINP2	12	11	28	4.2881	4.81124	4.48124	0.599899
GSE30161	BRINP2	5	1	47	4.85528	5.17723	4.91163	0.656156
GSE14764	BRINP2	2	6	68	6.00963	6.09807	6.08666	0.732372
GSE51088	BRINP2	3	6	100	-0.08583	-0.00238667	-0.0783973	0.999956
GSE2109	BRMS1L	9	28	81	6.89974	7.27498	7.43683	0.0261187
GSE9891	BRMS1L	NA	20	246	NA	7.40979	7.52971	0.218653
GSE44104	BRMS1L	12	11	28	7.78193	7.61265	7.8316	0.275471
GSE30161	BRMS1L	5	1	47	5.30506	4.41443	5.30738	0.42456
GSE26193	BRMS1L	6	8	79	7.50836	7.71246	7.48943	0.509755
GSE26193	BST2	6	8	79	8.87566	8.59125	10.2736	0.000811663
GSE2109	BST2	9	28	81	9.30081	9.39302	10.1168	0.0393888
GSE14764	BST2	2	6	68	9.2785	10.5004	11.2048	0.0656807
GSE9891	BST2	NA	20	246	NA	10.001	10.5552	0.0833026
GSE6008	BST2	8	37	41	9.76142	10.4872	10.8335	0.0993269
GSE51088	BST2	3	6	100	-0.409823	-0.333192	-0.183345	0.235816
GSE44104	BST2	12	11	28	9.29236	9.6257	10.08	0.30696
GSE30161	BST2	5	1	47	7.07466	7.34288	7.34569	0.795199
GSE44104	BTNL8	12	11	28	4.74959	4.55651	4.84336	0.0080608
GSE6008	BTNL8	8	37	41	7.42713	7.24251	7.25541	0.0842536
GSE51088	BTNL8	3	6	100	-0.193167	-0.135452	-0.101355	0.263815
GSE9891	BTNL8	NA	20	246	NA	5.54217	5.25512	0.286013
GSE26193	BTNL8	6	8	79	5.11156	5.04393	5.20366	0.474697
GSE30161	BTNL8	5	1	47	5.20175	5.03312	4.97597	0.49406
GSE2109	BTNL8	9	28	81	5.71813	5.71902	5.59392	0.598709
GSE14764	BTNL8	2	6	68	7.38997	7.26557	7.24656	0.652645
GSE51088	C10orf35	3	6	100	0.173057	-0.0645383	0.0296608	0.158208
GSE44104	C10orf35	12	11	28	6.89511	6.80848	7.12894	0.204872
GSE30161	C10orf35	5	1	47	6.61655	6.8923	6.83113	0.341219
GSE26193	C10orf35	6	8	79	6.48649	6.44997	6.62622	0.405842
GSE2109	C10orf35	9	28	81	6.61213	6.48813	6.56517	0.514623
GSE9891	C10orf35	NA	20	246	NA	6.65298	6.62733	0.705579
GSE6008	C10orf76	8	37	41	8.88194	8.49318	8.52889	0.00282762
GSE44104	C10orf76	12	11	28	7.35477	7.02395	6.95151	0.0051658
GSE26193	C10orf76	6	8	79	7.40387	7.11894	6.9912	0.00585379
GSE51088	C10orf76	3	6	100	0.109957	0.125878	0.0614744	0.0209684
GSE2109	C10orf76	9	28	81	6.9527	6.98383	6.81703	0.0902911
GSE30161	C10orf76	5	1	47	4.59851	5.6304	4.82586	0.295937
GSE14764	C10orf76	2	6	68	8.68015	8.54511	8.54839	0.661745
GSE9891	C10orf76	NA	20	246	NA	6.91392	6.89814	0.703335
GSE26193	C10orf88	6	8	79	6.80686	6.7097	6.13908	2.84e-05
GSE44104	C10orf88	12	11	28	6.77368	6.24297	6.66512	0.000172313
GSE14764	C10orf88	2	6	68	6.34699	5.95903	5.90228	0.109378
GSE30161	C10orf88	5	1	47	5.17338	4.0187	4.9206	0.202077
GSE6008	C10orf88	8	37	41	6.27927	6.10843	6.05978	0.21371
GSE2109	C10orf88	9	28	81	6.40887	6.22875	6.20864	0.622308
GSE9891	C10orf88	NA	20	246	NA	6.20574	6.25508	0.667791
GSE2109	C12orf74	9	28	81	3.42531	3.33543	3.40996	0.100544
GSE9891	C12orf74	NA	20	246	NA	3.35769	3.33388	0.213047
GSE26193	C12orf74	6	8	79	3.37683	3.30488	3.36698	0.363171
GSE44104	C12orf74	12	11	28	3.25916	3.29173	3.24833	0.565571
GSE30161	C12orf74	5	1	47	3.56856	3.43095	3.65009	0.706711
GSE26193	C12orf75	6	8	79	11.0555	8.8965	8.13272	0.000104112
GSE44104	C12orf75	12	11	28	11.0077	9.4509	8.90011	0.000544116
GSE30161	C12orf75	5	1	47	6.21552	3.81587	4.80337	0.0371015
GSE2109	C12orf75	9	28	81	9.53766	8.04579	7.75857	0.0395359
GSE9891	C12orf75	NA	20	246	NA	7.74874	7.88133	0.978299
GSE6008	C14orf105	8	37	41	4.82533	4.54434	4.57484	0.000365921
GSE26193	C14orf105	6	8	79	5.99067	4.67347	4.20283	0.0128698
GSE2109	C14orf105	9	28	81	5.14019	4.53023	4.31796	0.0186719
GSE51088	C14orf105	3	6	100	0.14242	-0.0369933	-0.0562408	0.0648656
GSE14764	C14orf105	2	6	68	4.70909	4.54351	4.52049	0.0915507
GSE44104	C14orf105	12	11	28	6.16206	4.40203	4.40154	0.116523
GSE9891	C14orf105	NA	20	246	NA	3.93498	3.97842	0.737258
GSE30161	C14orf105	5	1	47	4.48472	4.11845	4.28515	0.932383
GSE51088	C16orf70	3	6	100	0.10151	0.12664	0.0618575	0.0746256
GSE9891	C16orf70	NA	20	246	NA	7.19085	7.08632	0.0946448
GSE26193	C16orf70	6	8	79	7.34042	7.1602	7.08504	0.105801
GSE6008	C16orf70	8	37	41	5.71616	5.72349	5.67236	0.286876
GSE30161	C16orf70	5	1	47	7.04162	6.26034	6.78603	0.32176
GSE14764	C16orf70	2	6	68	5.61594	5.56225	5.63364	0.499413
GSE44104	C16orf70	12	11	28	7.45177	7.28849	7.27668	0.667762
GSE2109	C16orf70	9	28	81	7.31319	7.14434	7.16856	0.786293
GSE26193	C16orf74	6	8	79	6.07494	4.94766	5.10487	0.0073249
GSE2109	C16orf74	9	28	81	5.81023	5.38889	5.56919	0.0270896
GSE44104	C16orf74	12	11	28	6.15706	5.78843	5.39789	0.154168
GSE30161	C16orf74	5	1	47	7.64189	7.72213	7.40755	0.15885
GSE9891	C16orf74	NA	20	246	NA	5.22643	5.22609	0.785609
GSE26193	C19orf47	6	8	79	5.6427	5.40697	5.45687	0.184744
GSE30161	C19orf47	5	1	47	6.73747	7.65235	6.68247	0.254557
GSE2109	C19orf47	9	28	81	5.94788	5.84452	5.89957	0.47084
GSE44104	C19orf47	12	11	28	5.58496	5.53128	5.54777	0.52496
GSE9891	C19orf47	NA	20	246	NA	5.59859	5.58034	0.987943
GSE2109	C19orf68	9	28	81	6.67242	6.39249	6.57366	0.313491
GSE30161	C19orf68	5	1	47	8.69141	9.46146	8.95784	0.380778
GSE44104	C19orf68	12	11	28	6.16829	6.0915	6.18303	0.436197
GSE9891	C19orf68	NA	20	246	NA	6.09946	6.16006	0.601061
GSE26193	C19orf68	6	8	79	5.57837	5.55305	5.6672	0.678196
GSE51088	C19orf68	3	6	100	-0.0262267	-0.0773917	-0.0597347	0.843845
GSE44104	C1orf226	12	11	28	6.19057	6.90673	6.40494	0.0751835
GSE2109	C1orf226	9	28	81	5.58545	6.07723	5.85783	0.101268
GSE26193	C1orf226	6	8	79	6.57801	5.96992	6.05016	0.37571
GSE30161	C1orf226	5	1	47	5.80392	5.96075	5.5611	0.455073
GSE9891	C1orf226	NA	20	246	NA	6.06648	5.91062	0.515811
GSE51088	C1orf226	3	6	100	0.00378667	0.00667667	0.0112266	0.997207
GSE51088	C1orf54	3	6	100	0.0940933	-0.148898	0.0723501	0.0590885
GSE6008	C1orf54	8	37	41	7.98178	8.25138	8.06731	0.0923348
GSE26193	C1orf54	6	8	79	7.75981	7.20451	7.53521	0.25543
GSE9891	C1orf54	NA	20	246	NA	7.8902	7.95122	0.309854
GSE14764	C1orf54	2	6	68	7.8531	8.25093	8.22889	0.543584
GSE30161	C1orf54	5	1	47	5.62514	5.1623	5.53027	0.600927
GSE2109	C1orf54	9	28	81	7.28059	7.48737	7.46768	0.755123
GSE44104	C1orf54	12	11	28	7.85825	7.7583	7.84883	0.994944
GSE6008	C1QL1	8	37	41	8.19131	7.88423	8.04668	0.000246417
GSE30161	C1QL1	5	1	47	6.87303	5.8056	6.65904	0.184195
GSE44104	C1QL1	12	11	28	5.67522	5.34854	5.20549	0.185743
GSE2109	C1QL1	9	28	81	6.36499	5.78338	5.9491	0.188832
GSE9891	C1QL1	NA	20	246	NA	5.78828	5.8406	0.635131
GSE26193	C1QL1	6	8	79	6.2351	6.38496	5.7368	0.754061
GSE14764	C1QL1	2	6	68	8.15379	8.08876	8.09637	0.920177
GSE51088	C1QL1	3	6	100	0.058	0.0563133	0.0564322	0.931068
GSE2109	C2	9	28	81	3.4637	3.49712	3.71566	0.00124369
GSE26193	C2	6	8	79	3.55277	3.36281	3.82952	0.00254981
GSE30161	C2	5	1	47	3.74936	4.87369	3.92368	0.278836
GSE44104	C2	12	11	28	3.83149	3.83803	3.94593	0.474129
GSE9891	C2	NA	20	246	NA	3.89355	3.76946	0.944579
GSE44104	CA9	12	11	28	5.74802	7.5703	6.28755	0.00857025
GSE51088	CA9	3	6	100	-0.449673	-0.270742	-0.209733	0.108316
GSE26193	CA9	6	8	79	5.74641	6.45795	6.46531	0.111883
GSE2109	CA9	9	28	81	6.56981	7.01511	6.45091	0.124968
GSE6008	CA9	8	37	41	7.51985	7.78881	7.95741	0.251273
GSE30161	CA9	5	1	47	6.68887	6.43387	6.41715	0.280213
GSE14764	CA9	2	6	68	7.45089	7.48496	7.77022	0.446747
GSE9891	CA9	NA	20	246	NA	6.43433	6.39082	0.741822
GSE9891	CACNG8	NA	20	246	NA	6.22804	6.09695	0.0702307
GSE44104	CACNG8	12	11	28	5.81207	5.71676	5.89654	0.0742468
GSE2109	CACNG8	9	28	81	6.43134	6.27635	6.26344	0.176999
GSE30161	CACNG8	5	1	47	6.39146	6.69578	6.3299	0.276774
GSE26193	CACNG8	6	8	79	5.88569	6.17358	6.0027	0.583282
GSE44104	CAMKMT	12	11	28	6.43788	6.80441	6.18157	0.00256973
GSE26193	CAMKMT	6	8	79	5.68056	5.56738	5.24482	0.0350629
GSE30161	CAMKMT	5	1	47	5.50632	4.51371	6.10937	0.122355
GSE9891	CAMKMT	NA	20	246	NA	5.26948	5.17693	0.222067
GSE2109	CAMKMT	9	28	81	4.81819	5.11279	5.02859	0.265054
GSE14764	CAMKMT	2	6	68	6.35304	6.20418	6.15161	0.2902
GSE6008	CAMKMT	8	37	41	6.34043	6.18109	6.16158	0.294033
GSE9891	CAMTA2	NA	20	246	NA	6.9034	7.1098	0.0247267
GSE6008	CAMTA2	8	37	41	6.97151	6.75071	6.74999	0.0391415
GSE30161	CAMTA2	5	1	47	8.78144	8.07923	8.07287	0.141382
GSE14764	CAMTA2	2	6	68	7.30156	7.15357	6.97425	0.185597
GSE26193	CAMTA2	6	8	79	7.24791	7.3026	7.14396	0.473121
GSE51088	CAMTA2	3	6	100	0.0825033	0.0582183	0.0591925	0.545414
GSE2109	CAMTA2	9	28	81	7.18049	7.08437	7.16481	0.676288
GSE44104	CAMTA2	12	11	28	7.26208	7.21357	7.24949	0.995471
GSE44104	CAP2	12	11	28	7.28569	7.50986	8.18506	0.000865244
GSE26193	CAP2	6	8	79	6.91859	7.75643	7.52142	0.0735043
GSE30161	CAP2	5	1	47	4.15643	4.23554	4.70695	0.0958906
GSE6008	CAP2	8	37	41	7.46194	7.85214	8.01211	0.0966597
GSE14764	CAP2	2	6	68	7.38661	7.44014	7.67216	0.337819
GSE2109	CAP2	9	28	81	6.83053	7.12414	7.16762	0.386676
GSE9891	CAP2	NA	20	246	NA	7.39643	7.57456	0.43552
GSE26193	CAPN14	6	8	79	4.16513	3.56058	3.32259	0.0138753
GSE44104	CAPN14	12	11	28	4.00337	3.31827	3.509	0.30164
GSE2109	CAPN14	9	28	81	3.46526	3.34805	3.21157	0.398082
GSE30161	CAPN14	5	1	47	4.78223	4.32042	3.87376	0.422143
GSE9891	CAPN14	NA	20	246	NA	3.25916	3.24624	0.934961
GSE6008	CAPNS1	8	37	41	11.6709	11.3868	11.5486	0.152083
GSE9891	CAPNS1	NA	20	246	NA	10.4506	10.6434	0.152833
GSE30161	CAPNS1	5	1	47	7.76421	5.55548	7.63285	0.256087
GSE51088	CAPNS1	3	6	100	0.03321	0.0934817	0.0322541	0.357039
GSE44104	CAPNS1	12	11	28	10.4825	10.206	10.3026	0.381248
GSE2109	CAPNS1	9	28	81	10.5513	10.1528	10.2697	0.475553
GSE26193	CAPNS1	6	8	79	10.8121	10.6729	10.682	0.918988
GSE14764	CAPNS1	2	6	68	11.4889	11.364	11.3811	0.926805
GSE2109	CAPSL	9	28	81	4.6762	5.95358	5.41284	0.0250072
GSE9891	CAPSL	NA	20	246	NA	5.40412	5.59919	0.185565
GSE30161	CAPSL	5	1	47	4.91649	4.75459	4.5446	0.209201
GSE26193	CAPSL	6	8	79	5.56419	5.31022	5.36415	0.593022
GSE44104	CAPSL	12	11	28	5.76888	5.47588	5.71086	0.787858
GSE51088	CAPSL	3	6	100	-0.0877033	-0.288565	-0.208942	0.90279
GSE2109	CAPZB	9	28	81	10.0857	9.79837	9.84364	0.194704
GSE44104	CAPZB	12	11	28	10.297	10.5254	10.4156	0.261837
GSE30161	CAPZB	5	1	47	8.00169	6.81197	7.09494	0.326217
GSE14764	CAPZB	2	6	68	10.5265	10.5582	10.6763	0.39305
GSE9891	CAPZB	NA	20	246	NA	9.95901	10.0217	0.580195
GSE6008	CAPZB	8	37	41	10.6291	10.6859	10.6413	0.739287
GSE51088	CAPZB	3	6	100	-0.0400833	-0.0261033	-0.0164488	0.745487
GSE26193	CAPZB	6	8	79	10.0881	9.97166	10.0678	0.921804
GSE44104	CASQ1	12	11	28	3.72704	4.40467	4.03825	0.00457938
GSE2109	CASQ1	9	28	81	3.94936	3.90474	3.88023	0.194263
GSE14764	CASQ1	2	6	68	5.86329	5.80478	5.73253	0.217863
GSE9891	CASQ1	NA	20	246	NA	3.73827	3.7921	0.244576
GSE30161	CASQ1	5	1	47	3.65429	3.59516	3.81588	0.366121
GSE26193	CASQ1	6	8	79	3.71569	3.88654	3.74872	0.436502
GSE51088	CASQ1	3	6	100	0.17697	0.125645	0.143142	0.574134
GSE6008	CASQ1	8	37	41	5.88436	5.89566	5.90599	0.865005
GSE2109	CBR1	9	28	81	8.44967	7.90967	7.56242	0.00106483
GSE44104	CBR1	12	11	28	8.74496	8.49548	8.04792	0.00533779
GSE26193	CBR1	6	8	79	8.31418	7.49359	7.83624	0.060408
GSE14764	CBR1	2	6	68	8.83652	7.94908	8.39198	0.17491
GSE6008	CBR1	8	37	41	8.28212	7.97625	7.92522	0.192314
GSE9891	CBR1	NA	20	246	NA	7.97182	7.9529	0.471936
GSE30161	CBR1	5	1	47	6.96037	7.30887	7.11154	0.859666
GSE44104	CCDC107	12	11	28	7.44151	7.62245	7.131	0.00386181
GSE26193	CCDC107	6	8	79	6.6357	6.65065	6.44295	0.126622
GSE9891	CCDC107	NA	20	246	NA	6.76021	6.6724	0.299883
GSE2109	CCDC107	9	28	81	6.62314	6.75303	6.78965	0.32867
GSE30161	CCDC107	5	1	47	7.7884	7.63587	7.59541	0.539997
GSE30161	CCDC124	5	1	47	8.04521	7.1592	7.42289	0.0392436
GSE26193	CCDC124	6	8	79	7.48516	7.33902	7.74752	0.0418371
GSE2109	CCDC124	9	28	81	7.21727	7.01698	7.2745	0.221687
GSE44104	CCDC124	12	11	28	7.47453	7.26358	7.18726	0.278557
GSE9891	CCDC124	NA	20	246	NA	7.51263	7.49476	0.698854
GSE44104	CCDC47	12	11	28	9.94975	9.56324	9.87867	0.0527625
GSE9891	CCDC47	NA	20	246	NA	8.8486	9.02147	0.125434
GSE6008	CCDC47	8	37	41	8.73443	8.39811	8.58342	0.183868
GSE14764	CCDC47	2	6	68	9.35048	8.77384	8.7098	0.448576
GSE2109	CCDC47	9	28	81	8.96946	8.7077	8.7456	0.464888
GSE26193	CCDC47	6	8	79	9.16142	9.13949	8.91655	0.50374
GSE30161	CCDC47	5	1	47	6.1739	5.49321	6.5836	0.630922
GSE44104	CCDC9	12	11	28	6.20978	5.98577	6.36246	0.000709629
GSE14764	CCDC9	2	6	68	8.72061	8.53089	8.85263	0.102109
GSE6008	CCDC9	8	37	41	8.75379	8.58171	8.63154	0.111551
GSE2109	CCDC9	9	28	81	6.73634	6.52384	6.60413	0.218674
GSE26193	CCDC9	6	8	79	6.35824	6.20724	6.29218	0.380866
GSE9891	CCDC9	NA	20	246	NA	6.38256	6.36167	0.590585
GSE30161	CCDC9	5	1	47	7.47316	7.06477	7.52986	0.606095
GSE2109	CCDC96	9	28	81	4.70983	5.07535	4.77538	0.0779432
GSE44104	CCDC96	12	11	28	5.61415	5.70238	5.50263	0.551061
GSE26193	CCDC96	6	8	79	5.03886	5.04738	4.9884	0.651942
GSE30161	CCDC96	5	1	47	4.73566	4.87629	4.72345	0.777161
GSE9891	CCDC96	NA	20	246	NA	4.86112	4.82773	0.830086
GSE2109	CCL4	9	28	81	6.87436	6.24973	6.78611	0.00736235
GSE9891	CCL4	NA	20	246	NA	6.42399	7.07072	0.00782068
GSE26193	CCL4	6	8	79	6.75513	5.74376	6.7841	0.0185705
GSE14764	CCL4	2	6	68	7.63088	7.74069	8.33019	0.039508
GSE30161	CCL4	5	1	47	5.71632	6.04377	5.51917	0.258539
GSE6008	CCL4	8	37	41	7.80268	7.84939	8.04598	0.36651
GSE44104	CCL4	12	11	28	6.6949	6.86961	7.04797	0.404942
GSE6008	CCNK	8	37	41	6.17674	6.07491	6.08962	0.116188
GSE2109	CCNK	9	28	81	8.87831	8.57885	8.71896	0.27809
GSE9891	CCNK	NA	20	246	NA	9.03642	8.97498	0.440877
GSE44104	CCNK	12	11	28	9.11189	9.03719	9.04565	0.512857
GSE26193	CCNK	6	8	79	8.96549	9.09351	9.07887	0.718127
GSE30161	CCNK	5	1	47	5.86083	5.44299	6.07175	0.737788
GSE14764	CCNK	2	6	68	6.14425	6.12805	6.12377	0.986561
GSE30161	CD1D	5	1	47	4.98325	5.17672	4.65811	0.260214
GSE44104	CD1D	12	11	28	4.70174	4.60537	4.4722	0.384714
GSE26193	CD1D	6	8	79	4.04899	3.84215	4.02697	0.557838
GSE6008	CD1D	8	37	41	5.43614	5.34252	5.36442	0.743993
GSE14764	CD1D	2	6	68	5.38402	5.52854	5.45921	0.809995
GSE9891	CD1D	NA	20	246	NA	4.10209	4.18855	0.865596
GSE2109	CD1D	9	28	81	4.23053	4.12047	4.12041	0.943107
GSE26193	CD37	6	8	79	5.52303	4.91264	5.70916	0.03455
GSE2109	CD37	9	28	81	5.73821	5.07606	5.42073	0.138104
GSE9891	CD37	NA	20	246	NA	5.56069	5.91144	0.146848
GSE14764	CD37	2	6	68	6.42256	7.09758	7.34773	0.159061
GSE44104	CD37	12	11	28	4.82179	4.58478	4.84666	0.347563
GSE30161	CD37	5	1	47	5.62302	5.36919	5.30097	0.497803
GSE6008	CD37	8	37	41	6.42016	6.51828	6.51849	0.698652
GSE26193	CD55	6	8	79	10.1583	9.07476	9.73559	0.0477033
GSE6008	CD55	8	37	41	9.30003	8.51368	8.88544	0.19663
GSE9891	CD55	NA	20	246	NA	9.84235	9.66046	0.312743
GSE14764	CD55	2	6	68	9.51247	9.05057	8.82954	0.436934
GSE44104	CD55	12	11	28	9.66654	9.47073	9.45001	0.602392
GSE2109	CD55	9	28	81	9.49117	9.28189	9.4535	0.61886
GSE30161	CD55	5	1	47	6.12329	5.23733	6.07034	0.864974
GSE9891	CD63	NA	20	246	NA	12.3224	12.1326	0.0237743
GSE30161	CD63	5	1	47	9.2642	6.88796	8.6783	0.0765029
GSE44104	CD63	12	11	28	12.092	11.9436	12.1207	0.16661
GSE2109	CD63	9	28	81	12.0971	12.09	11.9457	0.229485
GSE26193	CD63	6	8	79	12.0135	12.2369	12.0187	0.26939
GSE14764	CD63	2	6	68	12.4231	12.4469	12.3395	0.636397
GSE6008	CD63	8	37	41	12.5352	12.4808	12.4533	0.752901
GSE6008	CD9	8	37	41	11.4989	11.9446	12.2841	0.00255883
GSE44104	CD9	12	11	28	11.6451	12.4976	12.3798	0.0106312
GSE26193	CD9	6	8	79	11.1307	11.5214	11.6057	0.105545
GSE9891	CD9	NA	20	246	NA	11.9795	12.0761	0.253259
GSE2109	CD9	9	28	81	11.0914	11.3801	11.4943	0.361162
GSE30161	CD9	5	1	47	9.14275	7.66873	9.35041	0.488276
GSE14764	CD9	2	6	68	11.9308	11.8316	11.911	0.857449
GSE51088	CD9	3	6	100	-0.0464667	-0.0947817	-0.0716428	0.988873
GSE6008	CDA	8	37	41	8.04647	6.63834	6.5011	6.55e-05
GSE44104	CDA	12	11	28	6.23334	5.0348	4.63411	0.00292841
GSE26193	CDA	6	8	79	6.47893	4.99287	4.87912	0.0109629
GSE14764	CDA	2	6	68	8.23232	6.32714	6.46652	0.0454085
GSE2109	CDA	9	28	81	5.50427	5.01103	5.05918	0.0687072
GSE51088	CDA	3	6	100	0.105733	0.0418917	0.0773486	0.368074
GSE30161	CDA	5	1	47	5.05885	4.76111	5.06792	0.716768
GSE9891	CDA	NA	20	246	NA	4.91811	4.93599	0.744107
GSE44104	CDC42EP5	12	11	28	6.21368	6.10712	7.01273	0.0373606
GSE30161	CDC42EP5	5	1	47	6.10815	3.93928	5.54915	0.268985
GSE9891	CDC42EP5	NA	20	246	NA	6.20093	6.43049	0.504165
GSE26193	CDC42EP5	6	8	79	6.17751	6.35224	6.59095	0.565347
GSE2109	CDC42EP5	9	28	81	5.77313	5.81439	6.02627	0.740751
GSE6008	CDH1	8	37	41	12.042	10.6619	10.6872	0.000107818
GSE44104	CDH1	12	11	28	11.8633	11.6341	11.1359	0.000888315
GSE51088	CDH1	3	6	100	0.364823	0.059855	-0.166123	0.00369806
GSE26193	CDH1	6	8	79	11.9065	10.8457	10.6012	0.00518089
GSE2109	CDH1	9	28	81	10.9155	10.7555	10.2946	0.0082543
GSE9891	CDH1	NA	20	246	NA	10.7987	10.3726	0.0721247
GSE30161	CDH1	5	1	47	8.25562	4.39188	7.14413	0.120471
GSE14764	CDH1	2	6	68	11.6285	9.8303	10.2096	0.132681
GSE9891	CDIP1	NA	20	246	NA	6.18826	6.42004	0.0617836
GSE2109	CDIP1	9	28	81	6.60566	6.36605	6.5617	0.160014
GSE44104	CDIP1	12	11	28	6.65693	6.23327	6.71255	0.249985
GSE14764	CDIP1	2	6	68	6.53438	6.2715	6.42043	0.463762
GSE6008	CDIP1	8	37	41	6.71907	6.48204	6.53304	0.464824
GSE30161	CDIP1	5	1	47	7.04332	6.38502	6.95737	0.522054
GSE26193	CDIP1	6	8	79	6.27675	6.40927	6.32528	0.96246
GSE44104	CDK16	12	11	28	8.41225	7.68276	8.28667	0.006136
GSE6008	CDK16	8	37	41	9.99756	9.48226	9.82777	0.0217402
GSE26193	CDK16	6	8	79	9.12332	8.41377	8.76209	0.104562
GSE2109	CDK16	9	28	81	8.00081	8.03333	8.26553	0.231814
GSE14764	CDK16	2	6	68	10.2249	9.45659	9.57779	0.279904
GSE30161	CDK16	5	1	47	8.61445	7.76673	8.45247	0.483336
GSE9891	CDK16	NA	20	246	NA	8.54995	8.5192	0.557643
GSE9891	CDK5	NA	20	246	NA	7.86734	7.2747	0.000333745
GSE6008	CDK5	8	37	41	8.04138	8.36626	8.16264	0.0557702
GSE26193	CDK5	6	8	79	7.41068	7.85647	7.34347	0.0651143
GSE2109	CDK5	9	28	81	7.19115	7.11983	6.92145	0.202417
GSE14764	CDK5	2	6	68	7.86402	8.21801	8.35569	0.227921
GSE44104	CDK5	12	11	28	7.74559	8.06507	7.6102	0.258453
GSE30161	CDK5	5	1	47	4.82426	5.49447	4.56558	0.269033
GSE51088	CDK5	3	6	100	0.00091	0.0540617	0.0214047	0.662249
GSE51088	CDKN2A	3	6	100	-0.32624	-0.566267	-0.0183731	0.00221438
GSE2109	CDKN2A	9	28	81	7.8621	7.63567	8.69237	0.00252577
GSE6008	CDKN2A	8	37	41	8.8194	8.86341	9.68102	0.0164277
GSE26193	CDKN2A	6	8	79	7.50172	7.46674	8.68364	0.0368644
GSE9891	CDKN2A	NA	20	246	NA	8.11036	8.94516	0.0512417
GSE14764	CDKN2A	2	6	68	8.38788	8.78836	9.6973	0.0979352
GSE30161	CDKN2A	5	1	47	7.15597	5.18887	7.22381	0.262213
GSE44104	CDKN2A	12	11	28	7.97448	8.00704	8.12276	0.964845
GSE6008	CDKN2C	8	37	41	8.79974	7.55044	7.84806	0.000117186
GSE26193	CDKN2C	6	8	79	9.10783	7.36295	7.61644	0.117664
GSE9891	CDKN2C	NA	20	246	NA	6.95227	7.43588	0.209734
GSE2109	CDKN2C	9	28	81	6.49504	6.50498	7.08389	0.211479
GSE14764	CDKN2C	2	6	68	9.12544	7.94049	8.09973	0.798929
GSE44104	CDKN2C	12	11	28	8.28085	8.03918	8.20344	0.865544
GSE30161	CDKN2C	5	1	47	4.99932	4.92086	5.11558	0.946968
GSE6008	CEBPD	8	37	41	11.5972	10.7065	10.8656	0.00900648
GSE26193	CEBPD	6	8	79	11.2446	10.1371	10.8016	0.0138494
GSE14764	CEBPD	2	6	68	11.9984	10.968	10.9643	0.123379
GSE2109	CEBPD	9	28	81	10.8097	10.1125	10.3617	0.139447
GSE44104	CEBPD	12	11	28	11.0538	11.0071	10.6698	0.178965
GSE30161	CEBPD	5	1	47	8.78247	6.42885	8.09023	0.336311
GSE9891	CEBPD	NA	20	246	NA	10.3153	10.3003	0.808941
GSE6008	CEND1	8	37	41	8.43788	8.16461	8.28375	0.0175553
GSE26193	CEND1	6	8	79	6.66858	6.8357	6.85553	0.0471136
GSE44104	CEND1	12	11	28	6.56973	6.41745	6.57106	0.0623237
GSE9891	CEND1	NA	20	246	NA	6.76907	6.72374	0.259592
GSE2109	CEND1	9	28	81	7.24736	7.00226	7.06478	0.295679
GSE30161	CEND1	5	1	47	8.65733	8.8839	8.49179	0.386059
GSE14764	CEND1	2	6	68	8.58472	8.53228	8.48973	0.623377
GSE2109	CENPW	9	28	81	7.74022	7.88871	8.69297	0.00972003
GSE26193	CENPW	6	8	79	8.25585	8.05606	8.99376	0.0232055
GSE44104	CENPW	12	11	28	8.62745	9.35666	8.80821	0.158052
GSE9891	CENPW	NA	20	246	NA	8.63044	8.91348	0.444469
GSE30161	CENPW	5	1	47	5.2099	5.40932	5.44705	0.633324
GSE26193	CEP44	6	8	79	9.54892	7.52981	7.48863	0.00213946
GSE9891	CEP44	NA	20	246	NA	7.25638	7.49136	0.0273592
GSE44104	CEP44	12	11	28	9.38588	7.76863	8.04149	0.0478194
GSE51088	CEP44	3	6	100	0.142323	0.117408	0.0383179	0.278535
GSE2109	CEP44	9	28	81	8.09082	7.15001	7.16841	0.383597
GSE30161	CEP44	5	1	47	7.18108	6.67975	5.80062	0.645658
GSE44104	CFB	12	11	28	8.08015	9.49136	10.5643	0.000570351
GSE26193	CFB	6	8	79	8.2477	8.84689	10.4591	0.00131869
GSE14764	CFB	2	6	68	7.19519	9.41849	10.6975	0.0257861
GSE2109	CFB	9	28	81	8.70444	9.03689	9.83533	0.0451108
GSE6008	CFB	8	37	41	9.41432	9.75973	10.7782	0.0493328
GSE30161	CFB	5	1	47	6.738	6.21623	7.25894	0.590353
GSE51088	CFB	3	6	100	-0.0466767	-0.160403	-0.0486641	0.683376
GSE9891	CFB	NA	20	246	NA	10.2441	10.3536	0.790261
GSE2109	CHERP	9	28	81	9.04271	9.51495	9.77773	0.000688479
GSE26193	CHERP	6	8	79	9.25654	9.40467	9.85559	0.00130971
GSE6008	CHERP	8	37	41	8.46894	8.82369	9.02526	0.00251763
GSE9891	CHERP	NA	20	246	NA	9.40371	9.58173	0.150246
GSE14764	CHERP	2	6	68	8.01394	8.552	8.75256	0.163387
GSE51088	CHERP	3	6	100	-0.0710067	0.00478833	0.0181849	0.372258
GSE44104	CHERP	12	11	28	10.2501	10.1197	10.1768	0.668612
GSE30161	CHERP	5	1	47	10.161	8.87413	9.44496	0.688048
GSE6008	CHGB	8	37	41	5.97234	5.99238	5.56995	0.00535446
GSE26193	CHGB	6	8	79	4.59374	6.61654	4.14742	0.00538802
GSE2109	CHGB	9	28	81	4.30741	5.04944	4.23115	0.0153241
GSE9891	CHGB	NA	20	246	NA	5.4321	4.36441	0.111204
GSE44104	CHGB	12	11	28	5.18139	4.86947	4.56106	0.13815
GSE30161	CHGB	5	1	47	5.06722	4.70976	4.76163	0.188245
GSE14764	CHGB	2	6	68	5.89923	5.92669	5.96699	0.815436
GSE2109	CHIT1	9	28	81	5.40764	4.78949	4.94898	0.050544
GSE26193	CHIT1	6	8	79	4.91431	4.61924	4.77187	0.378704
GSE44104	CHIT1	12	11	28	4.68885	4.52585	4.59216	0.557015
GSE9891	CHIT1	NA	20	246	NA	4.76729	4.86644	0.580195
GSE6008	CHIT1	8	37	41	6.59953	6.65671	6.5859	0.584664
GSE51088	CHIT1	3	6	100	-0.16593	-0.189365	-0.151798	0.632203
GSE30161	CHIT1	5	1	47	5.35494	5.51715	5.24578	0.700809
GSE14764	CHIT1	2	6	68	6.63409	6.64041	6.66486	0.988422
GSE6008	CHMP4A	8	37	41	10.1527	9.75275	9.83825	0.0241437
GSE9891	CHMP4A	NA	20	246	NA	9.59074	9.37338	0.0336075
GSE44104	CHMP4A	12	11	28	9.5515	9.62111	9.39138	0.124566
GSE14764	CHMP4A	2	6	68	9.8502	9.82932	9.62248	0.322588
GSE26193	CHMP4A	6	8	79	9.60254	9.60743	9.40868	0.47014
GSE2109	CHMP4A	9	28	81	9.19175	9.24565	9.20513	0.684521
GSE30161	CHMP4A	5	1	47	10.4019	10.3834	10.1844	0.887248
GSE44104	CHMP6	12	11	28	7.28253	6.91206	6.80918	0.000204011
GSE6008	CHMP6	8	37	41	8.09757	7.66118	7.75152	0.000427757
GSE14764	CHMP6	2	6	68	7.62519	7.5556	7.82402	0.0881148
GSE30161	CHMP6	5	1	47	7.03964	6.93062	6.63068	0.0907471
GSE26193	CHMP6	6	8	79	6.74802	6.60213	6.56265	0.265511
GSE2109	CHMP6	9	28	81	6.61681	6.5965	6.66921	0.388256
GSE51088	CHMP6	3	6	100	0.0340967	0.0478417	0.0609539	0.634682
GSE9891	CHMP6	NA	20	246	NA	6.63291	6.59363	0.797253
GSE30161	CHRNA6	5	1	47	5.11566	4.79561	5.44742	0.0820832
GSE44104	CHRNA6	12	11	28	5.44242	5.30595	5.191	0.100533
GSE6008	CHRNA6	8	37	41	7.19555	7.07825	7.08143	0.101414
GSE26193	CHRNA6	6	8	79	5.46456	5.32605	5.51565	0.166578
GSE51088	CHRNA6	3	6	100	0.0336	0.0661317	0.0718678	0.563338
GSE14764	CHRNA6	2	6	68	7.22554	7.16096	7.14258	0.697931
GSE9891	CHRNA6	NA	20	246	NA	5.59063	5.59658	0.744107
GSE2109	CHRNA6	9	28	81	5.61743	5.60147	5.57706	0.815426
GSE6008	CHST2	8	37	41	7.90785	7.06923	6.95966	0.00220704
GSE26193	CHST2	6	8	79	9.38979	7.01903	7.17093	0.00751337
GSE14764	CHST2	2	6	68	9.41624	8.15927	7.27892	0.0137223
GSE44104	CHST2	12	11	28	8.20901	7.60088	7.20147	0.0408817
GSE30161	CHST2	5	1	47	7.3726	6.93006	6.64209	0.0698638
GSE2109	CHST2	9	28	81	7.19194	6.83753	6.75827	0.45727
GSE9891	CHST2	NA	20	246	NA	6.78507	6.76097	0.799587
GSE44104	CISD3	12	11	28	5.66245	5.11311	5.31149	0.00432802
GSE30161	CISD3	5	1	47	6.22709	5.43238	6.76566	0.0476904
GSE26193	CISD3	6	8	79	4.83068	4.89963	5.0766	0.297301
GSE9891	CISD3	NA	20	246	NA	5.04187	4.96636	0.412746
GSE2109	CISD3	9	28	81	4.93733	4.91138	4.88191	0.733841
GSE2109	CKS2	9	28	81	9.35604	9.27649	9.6907	0.0687073
GSE44104	CKS2	12	11	28	10.5588	10.876	10.4037	0.13325
GSE26193	CKS2	6	8	79	10.3647	9.72946	9.76799	0.143278
GSE51088	CKS2	3	6	100	-0.143607	0.08783	0.0793076	0.287209
GSE30161	CKS2	5	1	47	6.43577	4.14547	6.64982	0.290056
GSE14764	CKS2	2	6	68	10.2686	9.47451	9.62096	0.525891
GSE9891	CKS2	NA	20	246	NA	10.117	9.93675	0.590585
GSE6008	CKS2	8	37	41	10.4873	10.3386	10.2906	0.870848
GSE30161	CLASRP	5	1	47	8.4975	8.6889	8.03634	0.122098
GSE14764	CLASRP	2	6	68	9.32589	9.32691	9.13578	0.230293
GSE2109	CLASRP	9	28	81	8.48462	8.35206	8.36365	0.309464
GSE6008	CLASRP	8	37	41	8.71729	8.76405	8.80785	0.58816
GSE44104	CLASRP	12	11	28	8.28268	8.16653	8.19933	0.642415
GSE26193	CLASRP	6	8	79	8.11423	8.21552	8.21152	0.754297
GSE9891	CLASRP	NA	20	246	NA	8.09188	8.10837	0.915754
GSE6008	CLCN7	8	37	41	9.34303	8.89038	8.83095	0.000907777
GSE51088	CLCN7	3	6	100	0.106977	0.0215267	-0.0142364	0.027049
GSE2109	CLCN7	9	28	81	8.75406	8.36881	8.39334	0.0337949
GSE44104	CLCN7	12	11	28	8.58714	8.25756	8.21716	0.0542923
GSE9891	CLCN7	NA	20	246	NA	8.11105	7.95207	0.0711726
GSE26193	CLCN7	6	8	79	8.55149	8.24237	8.22072	0.160434
GSE30161	CLCN7	5	1	47	9.24644	9.36679	8.91658	0.164166
GSE14764	CLCN7	2	6	68	8.89539	8.66576	8.6488	0.35808
GSE6008	CLDN1	8	37	41	5.62989	5.69156	6.51295	0.000415161
GSE9891	CLDN1	NA	20	246	NA	7.84546	8.97525	0.00695469
GSE2109	CLDN1	9	28	81	8.96868	8.24955	8.87324	0.283419
GSE14764	CLDN1	2	6	68	5.69195	5.63972	6.25161	0.406926
GSE44104	CLDN1	12	11	28	9.51118	8.92556	9.65186	0.585251
GSE26193	CLDN1	6	8	79	8.03426	8.05996	8.47697	0.619951
GSE30161	CLDN1	5	1	47	5.86485	5.47447	6.0284	0.94822
GSE26193	CLDN11	6	8	79	5.60146	7.22203	6.88357	0.15156
GSE30161	CLDN11	5	1	47	5.54569	3.55628	5.31511	0.190352
GSE6008	CLDN11	8	37	41	7.69266	7.60345	7.58053	0.294756
GSE44104	CLDN11	12	11	28	7.36823	7.33759	6.9568	0.728681
GSE14764	CLDN11	2	6	68	7.93145	7.83115	7.90867	0.798929
GSE2109	CLDN11	9	28	81	7.3836	7.01656	7.06684	0.895913
GSE9891	CLDN11	NA	20	246	NA	7.0713	7.05461	0.98071
GSE9891	CLDN18	NA	20	246	NA	4.85882	4.53651	0.0726047
GSE30161	CLDN18	5	1	47	6.73601	4.78514	5.14262	0.085141
GSE44104	CLDN18	12	11	28	4.40302	4.37509	4.5643	0.259358
GSE6008	CLDN18	8	37	41	6.57926	6.55643	6.63297	0.314369
GSE14764	CLDN18	2	6	68	6.52313	6.57714	6.47688	0.472979
GSE26193	CLDN18	6	8	79	4.49954	4.52788	4.66951	0.766056
GSE2109	CLDN18	9	28	81	5.02115	5.14758	4.9517	0.982561
GSE30161	CLDN3	5	1	47	6.22985	6.39619	5.48862	0.0658162
GSE6008	CLDN3	8	37	41	10.688	10.1753	10.6349	0.0933028
GSE9891	CLDN3	NA	20	246	NA	9.29749	9.63537	0.193727
GSE14764	CLDN3	2	6	68	11.445	9.76679	10.5648	0.311944
GSE44104	CLDN3	12	11	28	9.85129	9.72865	9.25806	0.312937
GSE26193	CLDN3	6	8	79	10.1465	9.6422	9.77927	0.689909
GSE2109	CLDN3	9	28	81	8.73375	8.78507	9.11126	0.713199
GSE30161	CLEC4D	5	1	47	4.35843	4.43069	4.10332	0.209201
GSE44104	CLEC4D	12	11	28	4.0648	3.90995	4.03302	0.507865
GSE2109	CLEC4D	9	28	81	4.20367	4.07137	4.10576	0.754608
GSE9891	CLEC4D	NA	20	246	NA	4.02162	4.03056	0.846619
GSE26193	CLEC4D	6	8	79	4.02395	3.98753	4.02401	0.909446
GSE9891	CLIP3	NA	20	246	NA	6.88706	7.54323	0.000557305
GSE44104	CLIP3	12	11	28	6.4927	6.00422	6.78802	0.00112802
GSE2109	CLIP3	9	28	81	7.15728	7.01491	7.37834	0.0217375
GSE6008	CLIP3	8	37	41	8.74456	8.69905	8.88313	0.195241
GSE26193	CLIP3	6	8	79	7.11136	7.08034	7.42996	0.196346
GSE30161	CLIP3	5	1	47	6.51182	7.2912	6.56253	0.335233
GSE14764	CLIP3	2	6	68	9.07453	8.96254	9.07131	0.889864
GSE2109	CLPTM1	9	28	81	8.47853	8.18672	8.19161	0.0396885
GSE44104	CLPTM1	12	11	28	7.75562	7.45426	7.64971	0.0700053
GSE9891	CLPTM1	NA	20	246	NA	8.03802	7.93071	0.105881
GSE14764	CLPTM1	2	6	68	9.17902	9.19945	9.07225	0.317606
GSE30161	CLPTM1	5	1	47	8.29101	8.30147	8.02581	0.353262
GSE6008	CLPTM1	8	37	41	9.05933	8.89637	8.9105	0.373608
GSE51088	CLPTM1	3	6	100	0.0620733	0.0859917	0.0382603	0.454919
GSE26193	CLPTM1	6	8	79	8.14487	8.08806	8.10401	0.832945
GSE2109	CLPTM1L	9	28	81	10.3453	9.90649	9.99703	0.199152
GSE51088	CLPTM1L	3	6	100	0.0826367	-0.0530317	-0.0422392	0.380401
GSE30161	CLPTM1L	5	1	47	8.21589	8.87241	8.66475	0.576437
GSE9891	CLPTM1L	NA	20	246	NA	10.3676	10.3365	0.635131
GSE44104	CLPTM1L	12	11	28	10.4533	10.3456	10.4053	0.753074
GSE26193	CLPTM1L	6	8	79	10.4705	10.4035	10.4989	0.771407
GSE6008	CLSTN1	8	37	41	10.9822	10.2908	10.3383	0.00777176
GSE26193	CLSTN1	6	8	79	10.79	9.82197	9.9366	0.0463108
GSE44104	CLSTN1	12	11	28	10.1554	9.65536	10.0667	0.052455
GSE14764	CLSTN1	2	6	68	10.5414	9.87059	9.98663	0.202605
GSE9891	CLSTN1	NA	20	246	NA	9.82888	9.88762	0.523651
GSE30161	CLSTN1	5	1	47	8.46524	7.90528	8.14094	0.73343
GSE2109	CLSTN1	9	28	81	9.93632	9.99693	9.97564	0.982008
GSE6008	CNOT3	8	37	41	6.2386	6.55528	6.73755	0.037909
GSE9891	CNOT3	NA	20	246	NA	6.29217	6.43449	0.305554
GSE26193	CNOT3	6	8	79	7.37018	6.93311	7.01187	0.34265
GSE30161	CNOT3	5	1	47	6.07182	5.25753	5.88366	0.381016
GSE14764	CNOT3	2	6	68	6.64446	7.04658	6.82857	0.570627
GSE2109	CNOT3	9	28	81	6.14901	6.18651	6.12879	0.938098
GSE44104	CNOT3	12	11	28	6.06968	6.02725	6.02066	0.982773
GSE44104	CNTD1	12	11	28	4.72302	4.35923	4.592	0.040407
GSE2109	CNTD1	9	28	81	5.14562	5.23183	5.10878	0.198458
GSE9891	CNTD1	NA	20	246	NA	5.0285	4.98148	0.405883
GSE30161	CNTD1	5	1	47	4.80291	4.91895	4.9725	0.660973
GSE26193	CNTD1	6	8	79	4.80457	4.83852	4.82863	0.961486
GSE6008	CNTD2	8	37	41	9.3294	9.17505	9.16066	0.101183
GSE9891	CNTD2	NA	20	246	NA	6.67177	6.59159	0.138613
GSE2109	CNTD2	9	28	81	7.22975	6.97264	6.94377	0.365287
GSE14764	CNTD2	2	6	68	9.3749	9.24797	9.08162	0.506243
GSE26193	CNTD2	6	8	79	6.74819	6.53073	6.56204	0.558029
GSE30161	CNTD2	5	1	47	6.63647	7.04918	6.77082	0.821445
GSE44104	CNTD2	12	11	28	6.45708	6.43918	6.45831	0.93491
GSE6008	COL11A2	8	37	41	8.00855	7.86689	7.95613	0.0806208
GSE44104	COL11A2	12	11	28	5.90178	5.73408	5.91028	0.178946
GSE14764	COL11A2	2	6	68	7.90601	7.99662	8.09695	0.265035
GSE2109	COL11A2	9	28	81	6.48477	6.33658	6.45014	0.305382
GSE30161	COL11A2	5	1	47	6.44738	7.6986	6.43437	0.339034
GSE9891	COL11A2	NA	20	246	NA	6.12945	6.14452	0.628681
GSE26193	COL11A2	6	8	79	5.97575	6.02145	6.03329	0.956675
GSE26193	COL18A1	6	8	79	9.64739	9.06569	8.93999	0.0822967
GSE6008	COL18A1	8	37	41	9.9999	9.50941	9.39841	0.158108
GSE51088	COL18A1	3	6	100	0.0897067	0.0508117	-0.0862984	0.230871
GSE30161	COL18A1	5	1	47	8.28827	9.09739	8.09542	0.241212
GSE9891	COL18A1	NA	20	246	NA	8.57833	8.80936	0.402477
GSE14764	COL18A1	2	6	68	9.66152	9.19747	9.10175	0.601649
GSE2109	COL18A1	9	28	81	9.19961	9.18793	9.07351	0.619988
GSE44104	COL18A1	12	11	28	9.40613	9.32376	9.22377	0.8416
GSE30161	COL19A1	5	1	47	4.48135	4.0666	4.25336	0.222896
GSE2109	COL19A1	9	28	81	4.06813	3.96911	3.97874	0.313543
GSE14764	COL19A1	2	6	68	5.70305	5.5041	5.59323	0.330006
GSE6008	COL19A1	8	37	41	5.36829	5.40261	5.42161	0.374403
GSE9891	COL19A1	NA	20	246	NA	3.97626	3.94059	0.561711
GSE26193	COL19A1	6	8	79	3.91341	3.87199	3.8979	0.905094
GSE44104	COL19A1	12	11	28	3.85939	3.81328	3.85611	0.915122
GSE26193	COL27A1	6	8	79	9.75261	7.88035	7.71206	0.00641089
GSE2109	COL27A1	9	28	81	8.02779	8.48707	7.84199	0.0219998
GSE30161	COL27A1	5	1	47	8.43003	6.74181	7.06485	0.102044
GSE51088	COL27A1	3	6	100	0.0946867	-0.243137	-0.17186	0.20056
GSE9891	COL27A1	NA	20	246	NA	8.02042	7.67047	0.317109
GSE44104	COL27A1	12	11	28	8.27322	7.73501	7.75383	0.620501
GSE6008	COL2A1	8	37	41	6.52134	6.39497	5.98632	0.0188205
GSE2109	COL2A1	9	28	81	5.12412	5.51719	5.01713	0.284732
GSE30161	COL2A1	5	1	47	4.71963	8.25667	5.25697	0.320791
GSE9891	COL2A1	NA	20	246	NA	4.63947	4.58753	0.416203
GSE14764	COL2A1	2	6	68	6.13846	5.92345	6.37533	0.632428
GSE44104	COL2A1	12	11	28	4.88164	5.38816	4.58712	0.803895
GSE26193	COL2A1	6	8	79	4.7269	4.85056	4.64735	0.874691
GSE6008	COL4A3	8	37	41	7.30329	6.06672	6.03064	4.42e-05
GSE44104	COL4A3	12	11	28	4.91924	3.90563	4.3837	0.00199075
GSE30161	COL4A3	5	1	47	6.22171	5.32621	4.61121	0.00451985
GSE26193	COL4A3	6	8	79	5.90285	4.64515	4.39239	0.0217905
GSE14764	COL4A3	2	6	68	6.72453	5.93137	6.00871	0.0631452
GSE2109	COL4A3	9	28	81	4.88122	4.32169	4.37089	0.438356
GSE9891	COL4A3	NA	20	246	NA	4.13153	4.21876	0.648115
GSE26193	COL4A4	6	8	79	6.60193	4.77916	4.24846	0.00121174
GSE6008	COL4A4	8	37	41	6.07172	5.56608	5.59214	0.00138384
GSE44104	COL4A4	12	11	28	5.84931	4.01696	4.51596	0.00509439
GSE30161	COL4A4	5	1	47	5.02816	3.58751	3.82855	0.0293849
GSE14764	COL4A4	2	6	68	6.04914	5.37148	5.42929	0.033191
GSE2109	COL4A4	9	28	81	4.8357	4.18668	4.13316	0.496313
GSE9891	COL4A4	NA	20	246	NA	4.17376	4.0927	0.549549
GSE26193	COMMD6	6	8	79	10.7163	11.1352	11.2472	0.0131162
GSE9891	COMMD6	NA	20	246	NA	11.1364	11.2994	0.0484239
GSE30161	COMMD6	5	1	47	6.45406	6.50646	7.29237	0.108942
GSE44104	COMMD6	12	11	28	11.4793	11.7451	11.7545	0.127049
GSE2109	COMMD6	9	28	81	10.9648	11.2451	11.1299	0.28274
GSE9891	COPS6	NA	20	246	NA	10.0904	9.88034	0.112567
GSE51088	COPS6	3	6	100	-0.108453	-0.00214833	-0.0042747	0.14002
GSE14764	COPS6	2	6	68	10.6077	10.3442	10.5752	0.160807
GSE44104	COPS6	12	11	28	9.91817	9.56233	9.77308	0.255405
GSE26193	COPS6	6	8	79	9.46243	9.6795	9.68295	0.336301
GSE6008	COPS6	8	37	41	10.1195	10.2615	10.2891	0.475577
GSE30161	COPS6	5	1	47	6.49484	6.77123	6.51921	0.770658
GSE2109	COPS6	9	28	81	9.65853	9.48549	9.55761	0.806806
GSE2109	CORO6	9	28	81	5.23395	4.71458	4.85931	0.000328876
GSE26193	CORO6	6	8	79	5.42667	4.54621	4.67087	0.00353196
GSE30161	CORO6	5	1	47	6.26784	6.30643	5.57153	0.00440756
GSE44104	CORO6	12	11	28	5.50721	4.99161	4.75903	0.0528439
GSE51088	CORO6	3	6	100	0.34098	0.0510033	0.0340999	0.408005
GSE9891	CORO6	NA	20	246	NA	4.70891	4.73968	0.496479
GSE9891	COX5A	NA	20	246	NA	11.4409	11.2013	0.0209371
GSE44104	COX5A	12	11	28	11.4568	11.7511	11.5819	0.119138
GSE30161	COX5A	5	1	47	9.73363	7.61025	10.0925	0.265324
GSE2109	COX5A	9	28	81	11.1858	11.3906	11.2146	0.38699
GSE14764	COX5A	2	6	68	10.9953	11.0558	11.243	0.557037
GSE26193	COX5A	6	8	79	11.3325	11.2785	11.4217	0.632546
GSE6008	COX5A	8	37	41	11.2787	11.2042	11.1912	0.79111
GSE9891	CPVL	NA	20	246	NA	7.40853	8.17624	0.00170538
GSE6008	CPVL	8	37	41	8.52422	7.28685	7.86287	0.00265864
GSE2109	CPVL	9	28	81	8.01943	6.98633	7.63428	0.0056819
GSE44104	CPVL	12	11	28	9.0821	7.29913	7.58536	0.00799352
GSE14764	CPVL	2	6	68	9.97372	7.29982	8.10835	0.0355513
GSE26193	CPVL	6	8	79	8.25336	6.84898	7.43852	0.141172
GSE30161	CPVL	5	1	47	6.08238	4.93877	5.504	0.490048
GSE26193	CR1L	6	8	79	5.41009	3.44656	3.61589	0.000424294
GSE44104	CR1L	12	11	28	5.05615	3.85757	3.76986	0.00138663
GSE30161	CR1L	5	1	47	5.67228	4.32975	4.25739	0.00329388
GSE9891	CR1L	NA	20	246	NA	3.62435	3.66209	0.466369
GSE2109	CR1L	9	28	81	3.76878	3.58627	3.60181	0.902463
GSE2109	CREB3L1	9	28	81	7.06209	7.54916	6.85339	0.0174847
GSE14764	CREB3L1	2	6	68	9.21944	9.56841	9.13218	0.107651
GSE51088	CREB3L1	3	6	100	0.0453467	0.0302633	0.0901821	0.223877
GSE26193	CREB3L1	6	8	79	7.16262	7.77229	6.96109	0.259184
GSE6008	CREB3L1	8	37	41	9.08947	9.06823	8.87563	0.299115
GSE30161	CREB3L1	5	1	47	7.59072	6.3953	6.28728	0.326176
GSE44104	CREB3L1	12	11	28	6.22376	6.62574	6.43115	0.708576
GSE9891	CREB3L1	NA	20	246	NA	6.76763	6.61904	0.760166
GSE6008	CRELD2	8	37	41	10.3084	9.79785	9.31577	1.31e-06
GSE2109	CRELD2	9	28	81	9.27898	9.18097	8.57287	9.29e-05
GSE26193	CRELD2	6	8	79	9.85157	9.62663	8.88016	0.000133364
GSE51088	CRELD2	3	6	100	0.379143	0.179933	0.040257	0.000356702
GSE44104	CRELD2	12	11	28	9.06957	9.90064	8.81145	0.000423568
GSE14764	CRELD2	2	6	68	10.1225	10.0394	9.52619	0.0189018
GSE9891	CRELD2	NA	20	246	NA	8.98786	8.53214	0.03023
GSE30161	CRELD2	5	1	47	7.25016	7.31896	6.90095	0.223095
GSE6008	CRIP1	8	37	41	8.17205	9.15509	10.4748	0.000409094
GSE2109	CRIP1	9	28	81	7.43507	8.37212	9.23222	0.00773471
GSE9891	CRIP1	NA	20	246	NA	8.91038	9.79891	0.00886021
GSE14764	CRIP1	2	6	68	6.89944	9.50686	10.2261	0.0354179
GSE44104	CRIP1	12	11	28	9.23454	10.4308	10.5401	0.0415011
GSE51088	CRIP1	3	6	100	-0.115073	-0.159172	0.0403062	0.137195
GSE30161	CRIP1	5	1	47	7.23685	5.73776	6.48675	0.173041
GSE26193	CRIP1	6	8	79	8.83541	9.40804	9.3592	0.62663
GSE44104	CRISP3	12	11	28	3.70139	4.9988	4.43502	0.0159736
GSE30161	CRISP3	5	1	47	3.60425	3.73135	4.21281	0.0363428
GSE26193	CRISP3	6	8	79	3.2409	3.96866	4.35289	0.300199
GSE14764	CRISP3	2	6	68	4.59907	4.63453	4.91401	0.474463
GSE51088	CRISP3	3	6	100	0.00150667	-0.0293017	0.0212852	0.594932
GSE9891	CRISP3	NA	20	246	NA	4.31341	3.94333	0.741822
GSE2109	CRISP3	9	28	81	4.34079	4.34365	4.22735	0.854934
GSE6008	CRISP3	8	37	41	4.53826	4.6628	4.60655	0.981046
GSE6008	CRKL	8	37	41	9.9271	9.26382	9.67806	4.16e-05
GSE9891	CRKL	NA	20	246	NA	9.06631	9.28795	0.0882624
GSE30161	CRKL	5	1	47	7.55231	6.97034	7.04722	0.299218
GSE14764	CRKL	2	6	68	9.40195	8.97033	9.21462	0.357023
GSE44104	CRKL	12	11	28	9.4813	9.49255	9.33175	0.509893
GSE2109	CRKL	9	28	81	9.19833	9.09714	9.15533	0.649026
GSE26193	CRKL	6	8	79	9.43095	9.32767	9.32422	0.711996
GSE6008	CRYM	8	37	41	8.88301	8.02744	7.90097	9.27e-05
GSE9891	CRYM	NA	20	246	NA	6.93672	6.36019	0.000112172
GSE2109	CRYM	9	28	81	7.40505	7.32791	6.65654	0.000394567
GSE44104	CRYM	12	11	28	7.75787	7.01029	6.20429	0.00528
GSE26193	CRYM	6	8	79	7.51373	6.77039	6.32744	0.00629967
GSE14764	CRYM	2	6	68	8.59262	8.32866	7.88129	0.0525737
GSE30161	CRYM	5	1	47	7.05784	7.01436	6.52472	0.101022
GSE51088	CRYM	3	6	100	0.230507	0.063625	-0.0223363	0.254144
GSE6008	CRYZL1	8	37	41	6.83246	7.00413	6.76664	0.102945
GSE9891	CRYZL1	NA	20	246	NA	7.7829	7.93767	0.183565
GSE30161	CRYZL1	5	1	47	5.51009	5.74642	6.10872	0.433942
GSE44104	CRYZL1	12	11	28	8.05236	7.94532	8.08017	0.570067
GSE2109	CRYZL1	9	28	81	7.16564	7.41796	7.33837	0.632979
GSE14764	CRYZL1	2	6	68	7.2643	7.21721	7.25024	0.786277
GSE26193	CRYZL1	6	8	79	7.85719	7.69741	7.79018	0.875565
GSE14764	CSF1	2	6	68	7.1339	7.04638	7.40733	0.00159302
GSE6008	CSF1	8	37	41	7.47557	7.33887	7.45776	0.00784027
GSE2109	CSF1	9	28	81	6.78319	6.9065	7.06638	0.0368885
GSE44104	CSF1	12	11	28	6.8213	6.91122	7.38317	0.0453363
GSE26193	CSF1	6	8	79	7.02973	6.81724	7.39859	0.0852431
GSE9891	CSF1	NA	20	246	NA	6.80453	7.03255	0.118151
GSE30161	CSF1	5	1	47	6.24051	6.89069	6.51784	0.378273
GSE9891	CSNK1D	NA	20	246	NA	9.2396	9.48468	0.0191621
GSE2109	CSNK1D	9	28	81	9.01832	9.47387	9.28742	0.0209917
GSE6008	CSNK1D	8	37	41	10.032	9.84416	10.0475	0.0630836
GSE26193	CSNK1D	6	8	79	9.03871	9.52251	9.31433	0.195977
GSE44104	CSNK1D	12	11	28	9.35765	9.2816	9.33832	0.431407
GSE14764	CSNK1D	2	6	68	9.67703	9.58515	9.45395	0.681692
GSE30161	CSNK1D	5	1	47	7.37977	7.66938	7.26804	0.727955
GSE26193	CSNK1G2	6	8	79	8.82653	9.25723	8.77212	0.00362145
GSE44104	CSNK1G2	12	11	28	9.20847	9.5001	9.25364	0.0172829
GSE6008	CSNK1G2	8	37	41	9.1358	9.40418	9.12241	0.0205791
GSE9891	CSNK1G2	NA	20	246	NA	8.59833	8.46432	0.0387036
GSE30161	CSNK1G2	5	1	47	9.3228	8.76817	9.46353	0.51886
GSE14764	CSNK1G2	2	6	68	9.64319	9.38358	9.44036	0.639668
GSE2109	CSNK1G2	9	28	81	8.54855	8.60575	8.60788	0.878248
GSE44104	CTBS	12	11	28	8.25723	8.24452	7.74327	0.00411785
GSE26193	CTBS	6	8	79	7.99472	7.22864	7.35149	0.0279405
GSE2109	CTBS	9	28	81	7.64645	7.14352	7.09271	0.100663
GSE6008	CTBS	8	37	41	7.30688	6.98919	6.84701	0.10944
GSE51088	CTBS	3	6	100	0.116647	-0.00926167	0.0108489	0.299043
GSE30161	CTBS	5	1	47	5.31362	5.22798	4.97785	0.535258
GSE14764	CTBS	2	6	68	6.79228	6.69224	6.54215	0.577438
GSE9891	CTBS	NA	20	246	NA	7.44956	7.48313	0.930155
GSE44104	CTH	12	11	28	7.86519	7.02564	6.19115	0.000538659
GSE26193	CTH	6	8	79	8.36099	6.14479	5.24678	0.00124636
GSE6008	CTH	8	37	41	6.26005	5.60431	5.41569	0.0016243
GSE14764	CTH	2	6	68	7.29488	5.60184	5.40264	0.0078068
GSE51088	CTH	3	6	100	-0.0417333	0.0342217	-0.240864	0.0231047
GSE9891	CTH	NA	20	246	NA	5.64523	5.06642	0.0375794
GSE30161	CTH	5	1	47	4.61634	3.67559	3.99518	0.120901
GSE2109	CTH	9	28	81	5.61723	5.36678	5.11871	0.323235
GSE30161	CTLA4	5	1	47	5.45851	5.15951	5.11021	0.219937
GSE6008	CTLA4	8	37	41	7.02281	6.92863	6.90675	0.236525
GSE2109	CTLA4	9	28	81	5.52311	5.36165	5.39986	0.328733
GSE44104	CTLA4	12	11	28	5.05763	5.12895	5.05717	0.579729
GSE14764	CTLA4	2	6	68	7.0936	6.81913	6.8505	0.639987
GSE26193	CTLA4	6	8	79	5.0633	5.00934	5.06236	0.805152
GSE9891	CTLA4	NA	20	246	NA	5.14536	5.15074	0.949392
GSE2109	CTNNBL1	9	28	81	7.66786	7.68874	7.97799	0.00612578
GSE44104	CTNNBL1	12	11	28	8.22044	7.99715	8.03645	0.197318
GSE14764	CTNNBL1	2	6	68	8.07964	8.47866	8.37361	0.388343
GSE9891	CTNNBL1	NA	20	246	NA	8.08078	8.12952	0.565794
GSE26193	CTNNBL1	6	8	79	7.73153	7.91026	7.88094	0.786782
GSE6008	CTNNBL1	8	37	41	8.17299	8.16015	8.18932	0.920311
GSE30161	CTNNBL1	5	1	47	6.94164	6.77248	6.87652	0.925818
GSE6008	CTSA	8	37	41	11.4449	10.2488	10.0436	0.000124727
GSE26193	CTSA	6	8	79	10.9788	9.85182	10.1707	0.00186064
GSE44104	CTSA	12	11	28	10.4927	9.92198	9.89283	0.0441992
GSE14764	CTSA	2	6	68	11.3245	10.2409	10.3627	0.0593574
GSE30161	CTSA	5	1	47	9.20992	6.63669	8.17711	0.128234
GSE2109	CTSA	9	28	81	10.286	9.76679	10.0467	0.332532
GSE9891	CTSA	NA	20	246	NA	10.1086	9.99166	0.47754
GSE44104	CTSV	12	11	28	7.92967	9.61175	7.65245	1.99e-05
GSE2109	CTSV	9	28	81	8.04064	8.37384	7.67076	0.0763131
GSE30161	CTSV	5	1	47	5.54274	6.06144	5.32438	0.22602
GSE14764	CTSV	2	6	68	8.2551	7.55603	8.01166	0.26795
GSE6008	CTSV	8	37	41	7.93163	8.50521	8.11144	0.291845
GSE51088	CTSV	3	6	100	-0.192087	-0.022195	-0.154458	0.62272
GSE26193	CTSV	6	8	79	7.60729	7.86684	7.63156	0.655221
GSE9891	CTSV	NA	20	246	NA	7.8223	7.71533	0.692153
GSE6008	CXCL14	8	37	41	10.5629	7.7541	6.26337	0.000379856
GSE44104	CXCL14	12	11	28	9.60646	8.96107	7.23711	0.0215468
GSE14764	CXCL14	2	6	68	11.6986	9.47111	7.14597	0.0227085
GSE2109	CXCL14	9	28	81	7.01728	7.78621	6.88772	0.303308
GSE26193	CXCL14	6	8	79	7.75213	7.67809	6.33984	0.355259
GSE30161	CXCL14	5	1	47	6.67928	4.20626	5.80647	0.405691
GSE9891	CXCL14	NA	20	246	NA	7.65096	6.83503	0.563751
GSE51088	CXCL16	3	6	100	0.0229533	-0.08159	0.104719	0.00661875
GSE26193	CXCL16	6	8	79	8.04818	7.39703	8.1279	0.0979279
GSE44104	CXCL16	12	11	28	8.17889	7.84585	8.64701	0.0985446
GSE2109	CXCL16	9	28	81	7.76991	7.68243	8.02698	0.158516
GSE30161	CXCL16	5	1	47	7.77936	7.10131	7.84021	0.317194
GSE9891	CXCL16	NA	20	246	NA	7.90147	8.11014	0.384053
GSE44104	CXCL2	12	11	28	6.6438	6.17676	7.43874	0.110991
GSE6008	CXCL2	8	37	41	5.87736	6.80835	6.62999	0.175445
GSE9891	CXCL2	NA	20	246	NA	5.91715	6.31229	0.317109
GSE51088	CXCL2	3	6	100	-0.50844	-0.367473	-0.173318	0.3331
GSE30161	CXCL2	5	1	47	5.08336	4.12238	4.80282	0.487562
GSE26193	CXCL2	6	8	79	6.99818	6.18988	6.6284	0.626469
GSE2109	CXCL2	9	28	81	6.72469	6.49378	6.53815	0.787879
GSE14764	CXCL2	2	6	68	7.10107	7.03893	7.42406	0.918643
GSE9891	CXCL5	NA	20	246	NA	3.94957	4.1363	0.146848
GSE44104	CXCL5	12	11	28	5.0296	6.25089	5.41804	0.291524
GSE30161	CXCL5	5	1	47	3.53151	4.1127	3.56649	0.315225
GSE2109	CXCL5	9	28	81	4.4209	5.3988	4.61975	0.337332
GSE14764	CXCL5	2	6	68	4.94865	5.62308	5.13364	0.66313
GSE26193	CXCL5	6	8	79	4.93298	4.62026	4.39401	0.695937
GSE6008	CXCL5	8	37	41	4.97084	5.60042	5.3554	0.886433
GSE6008	CYB5R3	8	37	41	11.8364	10.769	10.7218	7.68e-05
GSE26193	CYB5R3	6	8	79	11.3877	11.1636	10.7274	0.000839472
GSE51088	CYB5R3	3	6	100	0.103953	0.00767333	-0.169004	0.0168161
GSE2109	CYB5R3	9	28	81	11.128	10.6321	10.5969	0.0940848
GSE44104	CYB5R3	12	11	28	11.191	10.9923	10.916	0.146659
GSE14764	CYB5R3	2	6	68	11.5138	11.0344	11.0751	0.363248
GSE30161	CYB5R3	5	1	47	9.6805	7.56061	9.54553	0.425182
GSE9891	CYB5R3	NA	20	246	NA	10.4566	10.4094	0.820672
GSE44104	CYP2S1	12	11	28	5.45359	4.89759	5.49839	0.0028794
GSE26193	CYP2S1	6	8	79	5.05319	5.29767	5.97089	0.00647255
GSE51088	CYP2S1	3	6	100	0.0423467	0.003965	0.0714949	0.0325681
GSE2109	CYP2S1	9	28	81	5.61116	5.33195	5.55272	0.0343055
GSE30161	CYP2S1	5	1	47	6.12424	5.56971	6.12378	0.567315
GSE9891	CYP2S1	NA	20	246	NA	5.77791	5.77106	0.650289
GSE44104	CYP8B1	12	11	28	4.26519	3.90727	4.15024	0.00567066
GSE9891	CYP8B1	NA	20	246	NA	4.07383	4.00195	0.0541955
GSE2109	CYP8B1	9	28	81	4.29736	4.06165	4.16147	0.101323
GSE26193	CYP8B1	6	8	79	4.43144	3.95587	4.04276	0.35512
GSE30161	CYP8B1	5	1	47	6.11717	5.56961	4.94029	0.506231
GSE9891	CYR61	NA	20	246	NA	8.36209	9.56845	0.00010157
GSE2109	CYR61	9	28	81	9.48377	8.50625	9.21415	0.0380483
GSE14764	CYR61	2	6	68	10.0612	8.75783	9.84251	0.0726144
GSE51088	CYR61	3	6	100	-0.341277	-0.418283	-0.147269	0.191145
GSE26193	CYR61	6	8	79	9.67623	8.89249	9.5154	0.338185
GSE30161	CYR61	5	1	47	6.76659	5.57237	6.68655	0.550032
GSE44104	CYR61	12	11	28	9.56386	9.40395	9.87781	0.600265
GSE6008	CYR61	8	37	41	8.51017	8.79805	8.8965	0.718631
GSE44104	CYS1	12	11	28	7.57792	3.93087	5.31846	0.00236751
GSE9891	CYS1	NA	20	246	NA	4.27201	4.83047	0.00782068
GSE26193	CYS1	6	8	79	8.36818	4.63533	4.92357	0.0097715
GSE2109	CYS1	9	28	81	6.32948	4.55975	4.89462	0.0711364
GSE30161	CYS1	5	1	47	5.22909	4.52066	4.60019	0.695354
GSE26193	CYTL1	6	8	79	4.78603	5.68136	4.63205	0.00773616
GSE2109	CYTL1	9	28	81	4.7963	5.61106	4.99327	0.0103384
GSE6008	CYTL1	8	37	41	6.27958	6.47218	6.19344	0.0324904
GSE51088	CYTL1	3	6	100	-0.0484967	0.194535	0.01462	0.0384282
GSE9891	CYTL1	NA	20	246	NA	5.57289	4.9711	0.118151
GSE30161	CYTL1	5	1	47	4.01732	4.57994	4.26642	0.194753
GSE44104	CYTL1	12	11	28	5.20297	4.96268	5.1547	0.847326
GSE14764	CYTL1	2	6	68	6.48593	6.67263	6.63291	0.973577
GSE44104	DAGLB	12	11	28	7.328	6.75059	6.71009	0.0002581
GSE30161	DAGLB	5	1	47	6.91772	7.07208	6.14178	0.0185488
GSE26193	DAGLB	6	8	79	6.65526	6.26171	6.14048	0.0197736
GSE2109	DAGLB	9	28	81	6.56217	6.19376	6.18884	0.0960142
GSE9891	DAGLB	NA	20	246	NA	6.29134	6.26345	0.870353
GSE6008	DAPK1	8	37	41	11.1476	8.99952	8.97459	2.35e-05
GSE44104	DAPK1	12	11	28	10.1413	9.33793	8.62111	0.00232095
GSE26193	DAPK1	6	8	79	10.3903	8.56577	8.81544	0.0157844
GSE14764	DAPK1	2	6	68	11.1584	8.55541	8.74319	0.0532789
GSE2109	DAPK1	9	28	81	9.55851	8.90539	8.74333	0.0649026
GSE9891	DAPK1	NA	20	246	NA	8.46314	8.80765	0.123213
GSE30161	DAPK1	5	1	47	6.92389	5.41536	5.47093	0.269836
GSE44104	DAPL1	12	11	28	5.37353	5.38095	9.42674	5.27e-06
GSE26193	DAPL1	6	8	79	4.96907	5.36087	8.71636	3.22e-05
GSE2109	DAPL1	9	28	81	5.60317	6.88335	8.43477	0.000986242
GSE51088	DAPL1	3	6	100	-1.25284	-0.984838	-0.256663	0.00167989
GSE30161	DAPL1	5	1	47	5.73356	6.37327	6.87548	0.141382
GSE9891	DAPL1	NA	20	246	NA	8.32643	9.05887	0.238503
GSE9891	DBH	NA	20	246	NA	5.38674	4.90226	0.000532851
GSE51088	DBH	3	6	100	-0.0374733	0.264945	-0.0307475	0.118555
GSE26193	DBH	6	8	79	4.79246	5.24317	4.81893	0.162411
GSE14764	DBH	2	6	68	6.8862	7.07619	6.76301	0.287691
GSE2109	DBH	9	28	81	5.31557	5.30306	5.16584	0.4337
GSE44104	DBH	12	11	28	4.83161	4.90557	4.81911	0.5166
GSE6008	DBH	8	37	41	6.98118	7.19771	6.90535	0.596729
GSE30161	DBH	5	1	47	6.17715	6.16138	6.15783	0.963844
GSE30161	DBH-AS1	5	1	47	6.77375	6.87048	6.22154	0.0314692
GSE9891	DBH-AS1	NA	20	246	NA	5.20948	4.9359	0.0726047
GSE26193	DBH-AS1	6	8	79	5.00391	5.10223	4.79335	0.182417
GSE2109	DBH-AS1	9	28	81	4.98088	5.19924	4.99906	0.268239
GSE44104	DBH-AS1	12	11	28	4.86893	4.92277	4.8531	0.616779
GSE6008	DCK	8	37	41	6.28914	6.7122	6.80513	0.0431394
GSE14764	DCK	2	6	68	5.89509	6.53698	6.79993	0.0514538
GSE9891	DCK	NA	20	246	NA	7.66297	7.89634	0.0702307
GSE2109	DCK	9	28	81	7.30072	7.60955	7.72285	0.0725337
GSE44104	DCK	12	11	28	8.2634	8.54227	8.28571	0.264294
GSE30161	DCK	5	1	47	5.54929	5.48715	5.99869	0.517694
GSE26193	DCK	6	8	79	7.77723	8.00011	7.70637	0.601457
GSE44104	DCPS	12	11	28	8.22744	7.91804	7.32471	0.000261205
GSE6008	DCPS	8	37	41	8.6533	7.68005	7.6365	0.00882628
GSE51088	DCPS	3	6	100	0.11347	0.0277667	-0.0719525	0.0321162
GSE30161	DCPS	5	1	47	7.24526	6.51853	6.00092	0.0382782
GSE26193	DCPS	6	8	79	7.67573	7.42883	7.21995	0.122242
GSE9891	DCPS	NA	20	246	NA	7.10793	6.93863	0.149391
GSE2109	DCPS	9	28	81	7.31352	7.06735	6.81405	0.214058
GSE14764	DCPS	2	6	68	8.70004	7.90306	7.84209	0.288239
GSE6008	DCTN3	8	37	41	9.15445	9.75835	9.89501	0.00110656
GSE14764	DCTN3	2	6	68	9.41944	9.84923	10.0151	0.124287
GSE51088	DCTN3	3	6	100	-0.186887	0.0549033	0.0198804	0.149799
GSE26193	DCTN3	6	8	79	9.15137	9.60052	9.38148	0.157598
GSE44104	DCTN3	12	11	28	9.15348	9.36523	9.44095	0.194599
GSE2109	DCTN3	9	28	81	9.10858	9.32834	9.2881	0.374834
GSE30161	DCTN3	5	1	47	6.8517	6.64693	6.42862	0.388471
GSE9891	DCTN3	NA	20	246	NA	9.5337	9.56398	0.79259
GSE26193	DCUN1D5	6	8	79	8.50761	8.79419	9.0535	0.0201131
GSE2109	DCUN1D5	9	28	81	8.33887	8.58439	8.81285	0.0301121
GSE30161	DCUN1D5	5	1	47	6.18397	6.94145	7.27951	0.054441
GSE51088	DCUN1D5	3	6	100	-0.30308	-0.0896267	-0.0136626	0.112193
GSE9891	DCUN1D5	NA	20	246	NA	8.89981	9.04716	0.399088
GSE44104	DCUN1D5	12	11	28	9.36076	9.38049	9.17181	0.736457
GSE2109	DDAH2	9	28	81	7.98085	8.22581	8.77244	0.000439585
GSE44104	DDAH2	12	11	28	8.5314	8.46081	9.20937	0.00628587
GSE6008	DDAH2	8	37	41	9.28026	9.83101	10.0327	0.00893724
GSE14764	DDAH2	2	6	68	8.37761	9.52873	9.90486	0.0236831
GSE26193	DDAH2	6	8	79	8.16719	8.60794	8.89209	0.0345599
GSE9891	DDAH2	NA	20	246	NA	8.94818	9.10924	0.36937
GSE30161	DDAH2	5	1	47	7.50132	7.44836	7.69486	0.556081
GSE51088	DDAH2	3	6	100	-0.0964633	-0.0505933	-0.064561	0.88362
GSE6008	DDX1	8	37	41	10.2856	10.2515	10.0239	0.0789681
GSE2109	DDX1	9	28	81	9.98146	10.0036	9.75761	0.0888427
GSE44104	DDX1	12	11	28	10.207	9.98575	9.9786	0.197535
GSE9891	DDX1	NA	20	246	NA	10.1611	10.1209	0.471936
GSE26193	DDX1	6	8	79	10.0238	10.1488	9.98606	0.639605
GSE14764	DDX1	2	6	68	10.0463	10.1418	9.9758	0.680186
GSE30161	DDX1	5	1	47	7.49204	6.95016	7.3788	0.821445
GSE51088	DDX1	3	6	100	0.00669	0.00228833	-0.020598	0.837799
GSE6008	DECR1	8	37	41	10.5553	10.0035	9.76386	0.00135092
GSE2109	DECR1	9	28	81	9.33008	9.37012	8.95498	0.00314356
GSE14764	DECR1	2	6	68	10.5318	10.4573	9.82848	0.00738083
GSE26193	DECR1	6	8	79	10.0911	9.51358	9.31675	0.0348399
GSE9891	DECR1	NA	20	246	NA	9.65447	9.30155	0.0457374
GSE30161	DECR1	5	1	47	7.42561	5.05024	6.74517	0.0536484
GSE44104	DECR1	12	11	28	9.53577	9.66489	9.2811	0.197421
GSE26193	DENND3	6	8	79	6.36096	5.93279	6.49098	0.00955142
GSE30161	DENND3	5	1	47	8.03577	7.45232	7.32688	0.0150289
GSE2109	DENND3	9	28	81	6.76389	6.4535	6.57113	0.0593131
GSE9891	DENND3	NA	20	246	NA	6.31655	6.46211	0.12395
GSE14764	DENND3	2	6	68	8.31596	7.91941	7.83846	0.254543
GSE6008	DENND3	8	37	41	7.96371	7.89488	7.9266	0.770346
GSE44104	DENND3	12	11	28	6.31546	6.27311	6.38882	0.963549
GSE6008	DES	8	37	41	8.13165	7.85283	7.95255	0.00344136
GSE2109	DES	9	28	81	7.24895	7.08065	7.24242	0.160663
GSE26193	DES	6	8	79	6.87771	6.69728	6.83511	0.490386
GSE44104	DES	12	11	28	6.34328	6.2629	6.27572	0.517945
GSE30161	DES	5	1	47	7.905	8.74936	7.92182	0.563622
GSE14764	DES	2	6	68	8.22925	8.31175	8.39602	0.730255
GSE9891	DES	NA	20	246	NA	7.0073	7.03577	0.889426
GSE51088	DHDH	3	6	100	-0.09234	-0.0520483	0.0345836	0.0103326
GSE9891	DHDH	NA	20	246	NA	5.03554	4.91784	0.0899677
GSE44104	DHDH	12	11	28	4.85318	4.99753	4.92371	0.264204
GSE30161	DHDH	5	1	47	4.99375	5.29765	5.25641	0.607828
GSE2109	DHDH	9	28	81	4.99307	5.01363	4.95867	0.772191
GSE26193	DHDH	6	8	79	4.8555	4.8319	4.88154	0.959178
GSE6008	DKC1	8	37	41	9.86799	10.0664	10.2443	0.0747027
GSE26193	DKC1	6	8	79	9.2457	9.78882	9.61	0.0970429
GSE44104	DKC1	12	11	28	9.87364	10.1164	10.1393	0.251027
GSE30161	DKC1	5	1	47	7.45948	7.31298	7.85313	0.292629
GSE51088	DKC1	3	6	100	-0.0964933	0.00818	-0.0343186	0.593173
GSE2109	DKC1	9	28	81	9.39633	9.60138	9.5757	0.629972
GSE14764	DKC1	2	6	68	9.80036	9.58679	9.86306	0.659858
GSE9891	DKC1	NA	20	246	NA	9.82905	9.76734	0.771701
GSE2109	DKK1	9	28	81	4.61811	5.61244	4.23157	0.00197112
GSE26193	DKK1	6	8	79	3.9755	7.09348	3.88808	0.0215824
GSE44104	DKK1	12	11	28	5.31324	7.25374	4.58018	0.0228241
GSE6008	DKK1	8	37	41	5.89655	7.19696	5.94298	0.04603
GSE14764	DKK1	2	6	68	7.0797	7.96668	5.97182	0.0626218
GSE9891	DKK1	NA	20	246	NA	4.90325	3.94939	0.0822316
GSE30161	DKK1	5	1	47	3.87437	4.33792	3.71787	0.200647
GSE51088	DKK1	3	6	100	-0.329697	0.265732	-0.292777	0.558863
GSE44104	DLD	12	11	28	10.2634	10.399	9.94485	0.00636584
GSE2109	DLD	9	28	81	10.2283	9.96197	9.78408	0.0265116
GSE9891	DLD	NA	20	246	NA	10.2009	10.0419	0.151104
GSE6008	DLD	8	37	41	9.67925	9.78256	9.96503	0.161624
GSE26193	DLD	6	8	79	10.2691	10.2582	10.0618	0.249609
GSE14764	DLD	2	6	68	10.4967	10.0749	10.0494	0.377325
GSE30161	DLD	5	1	47	5.18928	4.54541	5.74893	0.379456
GSE2109	DLGAP3	9	28	81	5.32181	5.12567	5.2305	0.0506176
GSE26193	DLGAP3	6	8	79	5.17714	5.00639	5.12349	0.230245
GSE44104	DLGAP3	12	11	28	4.90482	4.99327	4.96787	0.268681
GSE30161	DLGAP3	5	1	47	6.47943	5.81454	6.31122	0.381016
GSE9891	DLGAP3	NA	20	246	NA	5.20613	5.20342	0.654647
GSE44104	DLX3	12	11	28	5.48421	4.96279	4.94926	0.117236
GSE26193	DLX3	6	8	79	5.00392	5.19785	4.45929	0.145474
GSE9891	DLX3	NA	20	246	NA	5.07063	4.63608	0.21416
GSE30161	DLX3	5	1	47	4.53819	4.3516	4.30136	0.667253
GSE2109	DLX3	9	28	81	4.63709	4.8737	4.70418	0.765285
GSE44104	DLX6-AS1	12	11	28	5.86757	6.98233	4.7797	0.000107242
GSE2109	DLX6-AS1	9	28	81	5.2767	6.18475	4.83515	0.000204592
GSE26193	DLX6-AS1	6	8	79	6.76581	6.28383	4.46534	0.000492657
GSE9891	DLX6-AS1	NA	20	246	NA	5.08203	4.47027	0.0576869
GSE30161	DLX6-AS1	5	1	47	4.32827	4.06107	4.16064	0.43765
GSE2109	DNPH1	9	28	81	8.65918	8.91724	9.16331	0.00632982
GSE6008	DNPH1	8	37	41	9.53662	9.76376	9.8889	0.0986724
GSE9891	DNPH1	NA	20	246	NA	9.32692	9.1461	0.232537
GSE14764	DNPH1	2	6	68	9.41871	9.55377	9.75138	0.312194
GSE26193	DNPH1	6	8	79	8.90657	8.84126	9.10961	0.391165
GSE30161	DNPH1	5	1	47	7.47929	6.75399	7.53148	0.422384
GSE44104	DNPH1	12	11	28	9.47073	9.44945	9.47962	0.990193
GSE26193	DNTTIP1	6	8	79	7.80277	7.95908	8.19033	0.00782046
GSE2109	DNTTIP1	9	28	81	8.05677	8.1323	8.33204	0.0673155
GSE44104	DNTTIP1	12	11	28	8.46826	8.08891	8.33079	0.080894
GSE30161	DNTTIP1	5	1	47	7.06953	6.14063	6.82058	0.179997
GSE51088	DNTTIP1	3	6	100	-0.0288933	-0.0274183	-0.00507869	0.762921
GSE9891	DNTTIP1	NA	20	246	NA	8.44442	8.38375	0.997588
GSE6008	DOCK5	8	37	41	6.7244	6.48177	6.28985	0.000215679
GSE2109	DOCK5	9	28	81	6.38659	7.03636	6.10004	0.00139483
GSE14764	DOCK5	2	6	68	6.47941	6.70787	6.3499	0.00234831
GSE9891	DOCK5	NA	20	246	NA	6.94975	6.30362	0.00557911
GSE44104	DOCK5	12	11	28	7.52092	7.017	6.89859	0.114366
GSE26193	DOCK5	6	8	79	6.74707	6.3667	6.29723	0.62663
GSE30161	DOCK5	5	1	47	4.92272	4.35977	4.76631	0.822178
GSE30161	DPY19L3	5	1	47	3.81294	3.89402	4.77781	0.0306245
GSE9891	DPY19L3	NA	20	246	NA	7.72642	8.06276	0.0545745
GSE26193	DPY19L3	6	8	79	7.44927	8.11648	8.09928	0.0943859
GSE44104	DPY19L3	12	11	28	8.41538	8.18113	8.42185	0.25591
GSE2109	DPY19L3	9	28	81	7.1433	7.7717	7.49569	0.287554
GSE44104	DPY30	12	11	28	10.9836	10.8581	10.7275	0.142875
GSE30161	DPY30	5	1	47	7.24619	5.23429	7.34341	0.305312
GSE9891	DPY30	NA	20	246	NA	10.4851	10.5822	0.309854
GSE51088	DPY30	3	6	100	0.08623	-0.044715	0.0385821	0.465587
GSE26193	DPY30	6	8	79	10.5033	10.4446	10.551	0.573086
GSE2109	DPY30	9	28	81	10.3235	10.1712	10.188	0.740757
GSE6008	DRAM1	8	37	41	9.32856	7.7216	7.74807	0.0001042
GSE44104	DRAM1	12	11	28	8.7945	7.82321	7.5613	0.000829454
GSE14764	DRAM1	2	6	68	9.4706	7.70449	7.98272	0.0255364
GSE2109	DRAM1	9	28	81	8.28186	7.26518	7.29231	0.0355368
GSE51088	DRAM1	3	6	100	0.343217	-0.0642967	3.45e-05	0.0540767
GSE9891	DRAM1	NA	20	246	NA	7.21387	7.48081	0.0888279
GSE26193	DRAM1	6	8	79	8.07401	7.22852	7.47041	0.30028
GSE30161	DRAM1	5	1	47	6.14231	5.49248	5.58648	0.314299
GSE26193	DTNBP1	6	8	79	7.69057	7.8623	7.86366	0.427662
GSE44104	DTNBP1	12	11	28	8.06096	8.24225	8.1413	0.559525
GSE30161	DTNBP1	5	1	47	7.18511	6.81722	7.0339	0.733326
GSE9891	DTNBP1	NA	20	246	NA	7.80207	7.80324	0.846619
GSE2109	DTNBP1	9	28	81	7.6859	7.60147	7.67544	0.89503
GSE26193	DTX1	6	8	79	5.88141	5.98726	5.68928	0.0302779
GSE44104	DTX1	12	11	28	5.84617	5.58268	5.51991	0.0483211
GSE9891	DTX1	NA	20	246	NA	5.77446	5.67208	0.0670145
GSE2109	DTX1	9	28	81	5.90303	5.92501	5.83677	0.348616
GSE30161	DTX1	5	1	47	6.16359	6.09685	5.96822	0.478556
GSE9891	DUSP27	NA	20	246	NA	3.89773	3.74882	0.00183261
GSE44104	DUSP27	12	11	28	4.89363	3.70778	3.97786	0.0229005
GSE30161	DUSP27	5	1	47	4.51976	4.5374	4.11857	0.121464
GSE26193	DUSP27	6	8	79	3.7273	3.72303	3.94283	0.417397
GSE2109	DUSP27	9	28	81	4.39643	3.95793	3.99414	0.745179
GSE6008	DYRK1B	8	37	41	7.16508	6.95498	7.11511	0.0403517
GSE9891	DYRK1B	NA	20	246	NA	5.73691	5.89948	0.0860294
GSE44104	DYRK1B	12	11	28	6.16211	5.91273	5.94253	0.121207
GSE2109	DYRK1B	9	28	81	5.8914	5.8506	6.02127	0.256929
GSE14764	DYRK1B	2	6	68	7.3209	7.24215	7.47623	0.49866
GSE26193	DYRK1B	6	8	79	5.87132	5.75914	5.9415	0.645732
GSE30161	DYRK1B	5	1	47	7.57341	7.70612	7.40652	0.647434
GSE44104	E2F3	12	11	28	8.76559	8.92208	9.58545	0.000115219
GSE2109	E2F3	9	28	81	7.97263	7.69872	8.31255	0.00028779
GSE14764	E2F3	2	6	68	7.94382	7.8672	8.37622	0.0118236
GSE6008	E2F3	8	37	41	8.2118	8.25557	8.35525	0.0341441
GSE26193	E2F3	6	8	79	7.81108	8.17861	8.26926	0.166413
GSE9891	E2F3	NA	20	246	NA	8.11403	8.34738	0.180595
GSE30161	E2F3	5	1	47	7.66021	7.63856	8.24855	0.208151
GSE51088	E2F3	3	6	100	0.0102833	-0.116044	0.0371412	0.242893
GSE6008	ECH1	8	37	41	10.5511	9.73739	9.78348	0.00275983
GSE26193	ECH1	6	8	79	10.0946	9.06138	9.20695	0.0225121
GSE14764	ECH1	2	6	68	10.6154	10.0458	9.86047	0.0406273
GSE9891	ECH1	NA	20	246	NA	9.05957	9.32861	0.0765393
GSE2109	ECH1	9	28	81	9.6793	9.05997	9.10253	0.0886702
GSE44104	ECH1	12	11	28	9.48164	8.98965	8.96103	0.102624
GSE30161	ECH1	5	1	47	7.45295	6.66441	7.09605	0.122718
GSE6008	EEF1A2	8	37	41	9.59717	5.91502	6.07841	9.64e-06
GSE26193	EEF1A2	6	8	79	8.99649	6.38548	5.55315	0.00398878
GSE30161	EEF1A2	5	1	47	8.18181	7.84951	7.54783	0.0100857
GSE44104	EEF1A2	12	11	28	7.40216	5.53167	5.87448	0.0136782
GSE2109	EEF1A2	9	28	81	7.83217	5.42933	5.82799	0.0145444
GSE14764	EEF1A2	2	6	68	9.18723	5.93271	6.11387	0.081534
GSE9891	EEF1A2	NA	20	246	NA	5.69303	5.50226	0.205375
GSE9891	EEF2K	NA	20	246	NA	8.79225	8.58806	0.0568953
GSE44104	EEF2K	12	11	28	9.42677	8.91811	8.79992	0.106635
GSE26193	EEF2K	6	8	79	9.2453	8.5267	8.82007	0.107403
GSE30161	EEF2K	5	1	47	7.52931	4.28907	6.99619	0.182569
GSE2109	EEF2K	9	28	81	8.18235	8.17599	8.33014	0.752593
GSE6008	EFNA1	8	37	41	11.8741	9.30505	9.87137	1.48e-06
GSE26193	EFNA1	6	8	79	10.7111	9.16775	9.47204	0.00490322
GSE2109	EFNA1	9	28	81	10.059	9.2525	9.14776	0.0100368
GSE14764	EFNA1	2	6	68	11.0423	8.96301	9.28521	0.0446605
GSE44104	EFNA1	12	11	28	10.0392	9.72916	9.57415	0.182369
GSE9891	EFNA1	NA	20	246	NA	9.57743	9.39881	0.201081
GSE30161	EFNA1	5	1	47	7.36458	5.62029	6.61238	0.32176
GSE51088	EFNA1	3	6	100	0.200087	-0.01959	0.0355589	0.548101
GSE9891	EGR1	NA	20	246	NA	8.83777	9.35102	0.0172351
GSE44104	EGR1	12	11	28	10.0903	9.57117	10.5943	0.0529252
GSE26193	EGR1	6	8	79	9.24748	8.60257	9.07018	0.101429
GSE51088	EGR1	3	6	100	-0.66299	-0.609708	-0.373082	0.149722
GSE2109	EGR1	9	28	81	9.29395	8.70883	9.07421	0.161507
GSE14764	EGR1	2	6	68	10.6302	9.44836	10.0167	0.288164
GSE6008	EGR1	8	37	41	9.61383	9.57009	9.78706	0.668459
GSE30161	EGR1	5	1	47	10.1083	8.40574	9.52313	0.723578
GSE26193	EGR3	6	8	79	6.4067	5.52633	5.48056	0.13426
GSE44104	EGR3	12	11	28	5.76978	5.97758	6.56409	0.290845
GSE30161	EGR3	5	1	47	4.83081	3.61405	4.99065	0.322191
GSE9891	EGR3	NA	20	246	NA	5.17535	5.40765	0.417938
GSE6008	EGR3	8	37	41	5.3482	5.56865	5.42701	0.564009
GSE51088	EGR3	3	6	100	-0.279393	-0.192667	-0.134832	0.602555
GSE2109	EGR3	9	28	81	5.20177	5.41923	5.23402	0.671958
GSE14764	EGR3	2	6	68	5.55881	5.7139	5.75448	0.972711
GSE9891	EID2	NA	20	246	NA	7.44251	7.74558	0.0860294
GSE30161	EID2	5	1	47	5.2274	3.70143	5.1744	0.259495
GSE44104	EID2	12	11	28	8.69946	8.64567	8.46222	0.264155
GSE51088	EID2	3	6	100	-0.0778	-0.0489333	-0.125784	0.27766
GSE26193	EID2	6	8	79	8.09469	7.95943	7.79928	0.51293
GSE2109	EID2	9	28	81	7.2905	7.45488	7.41623	0.8749
GSE9891	EID2B	NA	20	246	NA	4.17041	4.68825	0.00172304
GSE2109	EID2B	9	28	81	4.06069	4.1954	4.32565	0.541358
GSE44104	EID2B	12	11	28	4.92782	5.01709	5.04923	0.846032
GSE30161	EID2B	5	1	47	3.96719	3.72549	3.886	0.864974
GSE26193	EID2B	6	8	79	4.53015	4.66713	4.61351	0.918222
GSE51088	EID2B	3	6	100	-0.00534667	0.0349367	0.0151874	0.935271
GSE44104	EIF1	12	11	28	13.0412	12.8548	12.6713	9.13e-05
GSE2109	EIF1	9	28	81	12.8393	12.7024	12.5426	0.000491345
GSE14764	EIF1	2	6	68	13.1334	12.9304	12.6815	0.00877475
GSE6008	EIF1	8	37	41	12.916	12.651	12.5955	0.0110688
GSE51088	EIF1	3	6	100	-0.04611	0.00743333	-0.131142	0.0267853
GSE26193	EIF1	6	8	79	12.8729	12.8343	12.6673	0.0291104
GSE30161	EIF1	5	1	47	9.02844	6.58016	8.92238	0.287711
GSE9891	EIF1	NA	20	246	NA	12.5623	12.5326	0.645943
GSE6008	EIF1B	8	37	41	9.62645	10.0269	10.1873	0.00789133
GSE2109	EIF1B	9	28	81	10.0676	10.1023	10.2741	0.0267246
GSE26193	EIF1B	6	8	79	9.95686	10.2745	10.3205	0.12186
GSE30161	EIF1B	5	1	47	5.68654	3.43257	6.41739	0.12714
GSE14764	EIF1B	2	6	68	10.2075	10.3381	10.5518	0.265948
GSE51088	EIF1B	3	6	100	-0.06369	-0.0072	0.0168012	0.415297
GSE44104	EIF1B	12	11	28	10.6821	10.7401	10.5894	0.739188
GSE9891	EIF1B	NA	20	246	NA	10.3899	10.4287	0.739539
GSE44104	EIF3H	12	11	28	11.5885	11.5274	11.8777	0.00649131
GSE26193	EIF3H	6	8	79	11.3922	11.5374	11.7541	0.0400712
GSE6008	EIF3H	8	37	41	11.2234	11.5603	11.6383	0.0661992
GSE2109	EIF3H	9	28	81	11.5404	11.5375	11.677	0.202568
GSE9891	EIF3H	NA	20	246	NA	11.9541	11.8436	0.309854
GSE30161	EIF3H	5	1	47	8.79944	7.91951	9.0669	0.397579
GSE14764	EIF3H	2	6	68	12.0313	11.8269	11.8266	0.68084
GSE51088	EIF3H	3	6	100	-0.0803233	-0.079365	-0.0507254	0.859309
GSE14764	EIF3I	2	6	68	11.2844	11.0885	10.8865	0.12616
GSE44104	EIF3I	12	11	28	10.703	10.3785	10.5119	0.13731
GSE2109	EIF3I	9	28	81	10.4107	9.99726	10.1055	0.370491
GSE51088	EIF3I	3	6	100	0.08684	0.0913867	0.0340999	0.401246
GSE26193	EIF3I	6	8	79	10.7679	10.4165	10.7246	0.507267
GSE6008	EIF3I	8	37	41	10.9181	10.797	10.7095	0.606045
GSE9891	EIF3I	NA	20	246	NA	10.5522	10.5921	0.712327
GSE30161	EIF3I	5	1	47	5.57	4.91556	5.57072	0.807207
GSE26193	EIF4E3	6	8	79	8.48303	6.65005	7.47557	0.00121302
GSE44104	EIF4E3	12	11	28	8.29509	7.75429	7.28365	0.0052177
GSE9891	EIF4E3	NA	20	246	NA	7.5661	7.26957	0.0561127
GSE30161	EIF4E3	5	1	47	6.55428	5.03964	6.8502	0.228555
GSE2109	EIF4E3	9	28	81	7.29364	6.99939	7.02528	0.696118
GSE2109	EIF5A2	9	28	81	3.94338	5.04946	4.40891	0.016614
GSE30161	EIF5A2	5	1	47	3.55618	3.33585	3.83068	0.144136
GSE14764	EIF5A2	2	6	68	5.06479	5.5203	5.15529	0.185404
GSE26193	EIF5A2	6	8	79	3.94033	4.90259	4.44247	0.244209
GSE9891	EIF5A2	NA	20	246	NA	5.29745	4.71026	0.272583
GSE44104	EIF5A2	12	11	28	5.69572	5.26942	5.56214	0.67409
GSE6008	EIF5A2	8	37	41	5.15829	5.18008	5.1815	0.760765
GSE44104	EIF5B	12	11	28	10.8228	10.5394	10.6107	0.03716
GSE6008	EIF5B	8	37	41	10.2588	9.86025	9.90223	0.0384044
GSE30161	EIF5B	5	1	47	10.3651	9.92733	9.57644	0.233788
GSE9891	EIF5B	NA	20	246	NA	9.49977	9.60525	0.255779
GSE14764	EIF5B	2	6	68	10.5895	9.93607	9.89546	0.343476
GSE51088	EIF5B	3	6	100	0.0188633	0.0100467	0.0424681	0.466255
GSE26193	EIF5B	6	8	79	9.34947	9.16481	9.30918	0.500631
GSE2109	EIF5B	9	28	81	9.28764	9.38544	9.423	0.600635
GSE9891	ELMSAN1	NA	20	246	NA	6.76837	7.11109	9.54e-05
GSE44104	ELMSAN1	12	11	28	8.23079	7.79252	7.9765	0.0195212
GSE2109	ELMSAN1	9	28	81	6.76043	6.47718	6.84349	0.036925
GSE26193	ELMSAN1	6	8	79	7.24679	6.73395	7.13035	0.0385804
GSE30161	ELMSAN1	5	1	47	4.84375	4.62819	4.89015	0.777161
GSE2109	ELOVL3	9	28	81	4.32236	4.09169	4.259	0.0155343
GSE44104	ELOVL3	12	11	28	5.04672	3.82125	4.16582	0.0198842
GSE51088	ELOVL3	3	6	100	0.0542467	-0.0268783	0.0428609	0.029141
GSE26193	ELOVL3	6	8	79	5.30029	4.06965	4.2532	0.105141
GSE9891	ELOVL3	NA	20	246	NA	4.11297	4.26021	0.164436
GSE30161	ELOVL3	5	1	47	4.91129	4.42701	4.42117	0.356835
GSE2109	ELOVL7	9	28	81	8.04636	5.9228	6.28193	0.00192305
GSE44104	ELOVL7	12	11	28	8.58316	7.26256	7.5422	0.0273275
GSE26193	ELOVL7	6	8	79	8.44746	7.11086	7.14847	0.1024
GSE30161	ELOVL7	5	1	47	4.61366	3.76679	4.18918	0.559774
GSE9891	ELOVL7	NA	20	246	NA	6.76221	6.65551	0.932558
GSE2109	EMC2	9	28	81	8.71193	8.43	8.66059	0.242207
GSE44104	EMC2	12	11	28	9.25345	9.50132	9.54755	0.355454
GSE14764	EMC2	2	6	68	9.15335	8.62542	8.83478	0.45729
GSE26193	EMC2	6	8	79	9.17429	8.91427	9.123	0.48857
GSE9891	EMC2	NA	20	246	NA	8.96104	8.92019	0.696618
GSE30161	EMC2	5	1	47	4.7968	4.38124	5.09012	0.713069
GSE6008	EMC2	8	37	41	8.4071	8.37473	8.26963	0.895381
GSE9891	EMC7	NA	20	246	NA	9.82837	9.48333	0.00263587
GSE6008	EMC7	8	37	41	9.8898	9.69452	9.40003	0.00802074
GSE2109	EMC7	9	28	81	9.40344	9.50045	9.16719	0.0113048
GSE44104	EMC7	12	11	28	9.78172	9.91325	9.47215	0.0412903
GSE51088	EMC7	3	6	100	0.00276	0.1244	-0.0052343	0.0470902
GSE26193	EMC7	6	8	79	9.66703	9.72839	9.41457	0.11007
GSE14764	EMC7	2	6	68	10.671	10.1207	10.0816	0.385008
GSE30161	EMC7	5	1	47	7.00711	6.43811	7.17991	0.575327
GSE30161	EMD	5	1	47	8.7168	7.76774	9.01772	0.0536484
GSE6008	EMD	8	37	41	8.79378	8.45081	8.54806	0.0675001
GSE26193	EMD	6	8	79	7.60452	7.77385	7.85082	0.338791
GSE51088	EMD	3	6	100	0.0422533	-0.0118267	-0.0342682	0.436575
GSE14764	EMD	2	6	68	8.99925	8.90349	9.04231	0.464097
GSE2109	EMD	9	28	81	8.07381	7.91115	7.8884	0.490797
GSE9891	EMD	NA	20	246	NA	8.07457	7.97187	0.674402
GSE44104	EMD	12	11	28	8.77825	8.79449	8.85319	0.711272
GSE6008	EML2	8	37	41	8.80287	7.90759	8.04908	0.00015489
GSE44104	EML2	12	11	28	8.14229	7.79532	7.53671	0.00798335
GSE2109	EML2	9	28	81	7.60277	7.10233	7.08741	0.0189731
GSE26193	EML2	6	8	79	7.5355	7.12585	7.00883	0.0296794
GSE14764	EML2	2	6	68	8.90853	8.04899	7.98101	0.0475658
GSE30161	EML2	5	1	47	7.9582	7.78491	7.27082	0.0749625
GSE9891	EML2	NA	20	246	NA	6.94272	6.77063	0.0785709
GSE51088	EML2	3	6	100	0.13661	-0.0592183	-0.0500414	0.259696
GSE6008	ENTPD5	8	37	41	8.24299	6.90295	6.79871	5.38e-06
GSE44104	ENTPD5	12	11	28	8.78888	7.9234	7.36096	0.000428028
GSE26193	ENTPD5	6	8	79	8.55841	7.17123	7.19183	0.000973865
GSE2109	ENTPD5	9	28	81	7.74086	7.00073	6.88563	0.0523579
GSE14764	ENTPD5	2	6	68	7.43994	7.01404	6.84485	0.0719658
GSE30161	ENTPD5	5	1	47	5.58498	4.45195	4.91104	0.375563
GSE9891	ENTPD5	NA	20	246	NA	7.14375	6.94977	0.580195
GSE6008	EPAS1	8	37	41	11.7408	9.65932	9.68699	4.45e-05
GSE26193	EPAS1	6	8	79	11.4196	9.7736	10.115	0.00115233
GSE44104	EPAS1	12	11	28	11.3572	10.5754	10.121	0.00253309
GSE2109	EPAS1	9	28	81	10.7803	9.68264	9.93681	0.0133635
GSE14764	EPAS1	2	6	68	11.3789	10.7248	10.0897	0.023835
GSE30161	EPAS1	5	1	47	7.23361	3.9963	6.24805	0.161825
GSE51088	EPAS1	3	6	100	0.08163	0.04044	-0.0647264	0.68873
GSE9891	EPAS1	NA	20	246	NA	9.69831	9.77609	0.825376
GSE44104	EPN1	12	11	28	6.55213	6.2969	6.21902	0.00131643
GSE6008	EPN1	8	37	41	7.35522	7.17107	7.29414	0.012338
GSE26193	EPN1	6	8	79	7.32716	6.87802	7.09916	0.0601116
GSE2109	EPN1	9	28	81	7.77039	7.49938	7.62363	0.287555
GSE9891	EPN1	NA	20	246	NA	7.41669	7.47392	0.331951
GSE14764	EPN1	2	6	68	7.2429	7.46215	7.58779	0.361378
GSE30161	EPN1	5	1	47	7.99487	8.11811	8.02325	0.968308
GSE26193	EPS15L1	6	8	79	6.44824	6.49526	6.76241	0.00522046
GSE44104	EPS15L1	12	11	28	6.29133	6.04607	6.37471	0.0277994
GSE14764	EPS15L1	2	6	68	8.19184	8.37127	8.49001	0.154473
GSE2109	EPS15L1	9	28	81	6.62511	6.59271	6.72486	0.431529
GSE30161	EPS15L1	5	1	47	5.6806	5.12414	5.56803	0.642085
GSE6008	EPS15L1	8	37	41	8.29395	8.3187	8.32508	0.68638
GSE9891	EPS15L1	NA	20	246	NA	6.54037	6.54964	0.879881
GSE26193	ERCC2	6	8	79	7.04393	6.80361	6.70251	0.0423979
GSE9891	ERCC2	NA	20	246	NA	6.72702	6.64664	0.102659
GSE6008	ERCC2	8	37	41	7.01169	6.79201	6.80609	0.120594
GSE2109	ERCC2	9	28	81	7.13533	6.95486	6.98569	0.158317
GSE44104	ERCC2	12	11	28	6.96922	6.93501	6.87024	0.44667
GSE30161	ERCC2	5	1	47	6.36516	6.24324	6.31846	0.853949
GSE14764	ERCC2	2	6	68	6.95001	6.97653	6.92766	0.875631
GSE9891	ERGIC3	NA	20	246	NA	10.7413	10.5918	0.0838422
GSE44104	ERGIC3	12	11	28	10.2758	10.5352	10.4891	0.24977
GSE2109	ERGIC3	9	28	81	10.2672	10.321	10.4532	0.272506
GSE30161	ERGIC3	5	1	47	7.33865	7.87222	7.25544	0.388083
GSE14764	ERGIC3	2	6	68	10.6622	10.8802	10.9019	0.607275
GSE26193	ERGIC3	6	8	79	10.4618	10.6088	10.5735	0.720282
GSE6008	ERGIC3	8	37	41	10.781	10.8648	10.8291	0.855447
GSE26193	ERVH48-1	6	8	79	4.22363	4.15782	4.23627	0.31095
GSE9891	ERVH48-1	NA	20	246	NA	4.31075	4.27655	0.350344
GSE44104	ERVH48-1	12	11	28	4.21507	4.16402	4.17993	0.72546
GSE2109	ERVH48-1	9	28	81	4.28752	4.34317	4.35507	0.813378
GSE30161	ERVH48-1	5	1	47	4.95853	4.81074	4.89779	0.963122
GSE26193	ERVMER34-1	6	8	79	7.68795	6.13972	4.60378	1.92e-05
GSE6008	ERVMER34-1	8	37	41	7.74638	6.6307	5.83795	0.000398751
GSE2109	ERVMER34-1	9	28	81	4.85707	5.71787	4.87668	0.0295777
GSE44104	ERVMER34-1	12	11	28	6.91419	6.19605	5.37919	0.0373683
GSE9891	ERVMER34-1	NA	20	246	NA	5.93334	4.79289	0.0454106
GSE30161	ERVMER34-1	5	1	47	5.39264	4.74221	4.39144	0.269561
GSE14764	ERVMER34-1	2	6	68	8.09101	6.47423	5.6869	0.552567
GSE26193	ESD	6	8	79	10.0205	9.93409	9.65615	0.0568187
GSE2109	ESD	9	28	81	9.99039	10.0194	9.74205	0.076127
GSE30161	ESD	5	1	47	6.24973	5.39183	7.57183	0.127754
GSE44104	ESD	12	11	28	10.6227	10.4457	10.6597	0.338078
GSE6008	ESD	8	37	41	10.6526	10.3782	10.4708	0.359813
GSE9891	ESD	NA	20	246	NA	10.0298	10.0017	0.790261
GSE14764	ESD	2	6	68	10.6852	10.7895	10.8024	0.851929
GSE9891	ESR2	NA	20	246	NA	5.02705	4.89216	0.0191621
GSE51088	ESR2	3	6	100	-0.06679	-0.00215167	-0.0902886	0.0453351
GSE6008	ESR2	8	37	41	6.45666	6.35745	6.32026	0.0790044
GSE2109	ESR2	9	28	81	5.11415	5.22062	5.04512	0.172841
GSE44104	ESR2	12	11	28	4.8776	4.80521	4.74476	0.179293
GSE30161	ESR2	5	1	47	5.90732	5.72766	5.63286	0.239232
GSE14764	ESR2	2	6	68	6.48992	6.32821	6.41046	0.547643
GSE26193	ESR2	6	8	79	5.14389	4.94312	4.88903	0.896887
GSE9891	ESRRB	NA	20	246	NA	5.05907	4.99844	0.0679208
GSE51088	ESRRB	3	6	100	0.0901567	0.0502567	0.065362	0.207987
GSE30161	ESRRB	5	1	47	6.5208	6.09203	6.32438	0.359807
GSE44104	ESRRB	12	11	28	4.91806	4.8	4.88574	0.388628
GSE2109	ESRRB	9	28	81	5.21464	5.2069	5.17533	0.801716
GSE26193	ESRRB	6	8	79	4.94249	5.13024	4.98225	0.976774
GSE44104	EVC	12	11	28	7.48315	6.28721	7.28266	0.00217401
GSE9891	EVC	NA	20	246	NA	6.47793	6.87078	0.0117127
GSE30161	EVC	5	1	47	7.28146	6.23362	6.06379	0.0476631
GSE6008	EVC	8	37	41	7.83669	7.6993	7.78742	0.0588568
GSE2109	EVC	9	28	81	6.4534	6.3372	6.58881	0.214191
GSE14764	EVC	2	6	68	7.7624	7.79371	7.90283	0.237273
GSE26193	EVC	6	8	79	6.92322	6.54671	6.7972	0.796398
GSE51088	EVI2B	3	6	100	0.0618933	-0.0378483	0.10557	0.0342127
GSE26193	EVI2B	6	8	79	5.89614	5.20594	6.09842	0.105172
GSE9891	EVI2B	NA	20	246	NA	6.21222	6.68542	0.118864
GSE2109	EVI2B	9	28	81	6.51327	5.73112	6.22544	0.193948
GSE30161	EVI2B	5	1	47	4.52939	3.68274	4.51435	0.30595
GSE14764	EVI2B	2	6	68	5.9224	6.72841	6.72098	0.391408
GSE6008	EVI2B	8	37	41	6.14568	6.29793	6.25423	0.554356
GSE44104	EVI2B	12	11	28	6.46248	6.4164	6.42507	0.995802
GSE44104	EXOSC8	12	11	28	8.56251	9.0676	8.72446	0.040286
GSE26193	EXOSC8	6	8	79	8.21919	8.69877	8.2766	0.0734086
GSE9891	EXOSC8	NA	20	246	NA	8.38898	8.6055	0.162609
GSE14764	EXOSC8	2	6	68	6.45633	7.57128	7.28741	0.217369
GSE2109	EXOSC8	9	28	81	7.94771	8.29929	8.24855	0.301252
GSE6008	EXOSC8	8	37	41	7.4834	7.52317	7.3503	0.435514
GSE30161	EXOSC8	5	1	47	8.55651	8.88849	8.22909	0.549816
GSE6008	F3	8	37	41	8.08752	6.65631	6.2443	0.00046831
GSE26193	F3	6	8	79	8.12195	6.79493	6.54986	0.0312325
GSE14764	F3	2	6	68	9.67587	6.30378	6.29038	0.0511434
GSE30161	F3	5	1	47	8.38887	6.33833	7.03868	0.153681
GSE9891	F3	NA	20	246	NA	6.3978	6.56636	0.389026
GSE44104	F3	12	11	28	8.08512	7.70787	7.35158	0.543835
GSE2109	F3	9	28	81	6.98624	6.97063	6.78124	0.673252
GSE44104	FABP6	12	11	28	7.09346	5.60389	5.61277	0.0199548
GSE2109	FABP6	9	28	81	6.50419	5.5048	5.59724	0.0803141
GSE14764	FABP6	2	6	68	6.3899	5.96462	6.44752	0.186309
GSE6008	FABP6	8	37	41	6.16162	6.14864	6.44005	0.220028
GSE30161	FABP6	5	1	47	5.80962	6.78444	5.76874	0.25643
GSE26193	FABP6	6	8	79	5.57717	4.87443	5.68003	0.267745
GSE51088	FABP6	3	6	100	-0.0504633	-0.289812	-0.116837	0.334699
GSE9891	FABP6	NA	20	246	NA	5.55914	5.66771	0.785609
GSE44104	FAIM2	12	11	28	5.60167	5.54601	5.64766	0.329061
GSE30161	FAIM2	5	1	47	7.15384	7.60954	7.14024	0.455155
GSE14764	FAIM2	2	6	68	7.52781	7.63258	7.57893	0.514493
GSE26193	FAIM2	6	8	79	5.50941	5.52742	5.59712	0.536108
GSE6008	FAIM2	8	37	41	7.5729	7.5626	7.51773	0.587598
GSE9891	FAIM2	NA	20	246	NA	5.79528	5.77049	0.687699
GSE2109	FAIM2	9	28	81	6.11582	6.18534	6.14546	0.900142
GSE51088	FAM102A	3	6	100	0.13198	-0.0971083	-0.10827	0.118327
GSE6008	FAM102A	8	37	41	8.26422	8.22108	8.16315	0.538718
GSE30161	FAM102A	5	1	47	6.27211	6.74904	6.28479	0.619698
GSE44104	FAM102A	12	11	28	7.55153	7.3391	7.42766	0.647318
GSE2109	FAM102A	9	28	81	7.49167	7.36626	7.32124	0.74963
GSE14764	FAM102A	2	6	68	7.94566	7.90028	8.0087	0.839602
GSE9891	FAM102A	NA	20	246	NA	7.44796	7.44142	0.944579
GSE26193	FAM102A	6	8	79	7.67597	7.42922	7.54006	0.962355
GSE2109	FAM133A	9	28	81	4.71086	4.28453	4.25811	0.198356
GSE44104	FAM133A	12	11	28	4.44946	3.83655	4.06702	0.213294
GSE30161	FAM133A	5	1	47	3.63764	4.18354	3.74669	0.360424
GSE51088	FAM133A	3	6	100	0.0495467	0.0326717	0.0275585	0.582868
GSE26193	FAM133A	6	8	79	4.45575	4.09825	4.15873	0.671823
GSE9891	FAM133A	NA	20	246	NA	3.90624	4.01381	0.990354
GSE6008	FAM155A	8	37	41	7.0018	6.32263	6.114	4.56e-06
GSE26193	FAM155A	6	8	79	6.20319	5.04301	4.34632	0.00409936
GSE14764	FAM155A	2	6	68	7.7633	6.37702	6.28072	0.020213
GSE44104	FAM155A	12	11	28	6.33811	5.74226	5.18603	0.0344512
GSE30161	FAM155A	5	1	47	5.34007	6.5018	4.95916	0.110213
GSE2109	FAM155A	9	28	81	4.93333	4.5956	4.51978	0.220187
GSE9891	FAM155A	NA	20	246	NA	4.35529	4.30949	0.318574
GSE26193	FAM160B2	6	8	79	8.25072	7.92422	7.76916	0.00907067
GSE14764	FAM160B2	2	6	68	8.58073	8.57636	8.19417	0.026045
GSE6008	FAM160B2	8	37	41	8.55071	8.19402	8.05597	0.0439246
GSE2109	FAM160B2	9	28	81	7.93832	7.83587	7.69008	0.0916962
GSE51088	FAM160B2	3	6	100	0.08431	0.0338883	-0.0262819	0.0933739
GSE44104	FAM160B2	12	11	28	7.84599	7.78277	7.61734	0.132002
GSE30161	FAM160B2	5	1	47	8.3492	6.40217	7.60516	0.225396
GSE9891	FAM160B2	NA	20	246	NA	7.56654	7.61352	0.590585
GSE2109	FAM3D	9	28	81	6.32532	6.61247	6.28685	0.0161229
GSE44104	FAM3D	12	11	28	5.64617	5.87664	5.44777	0.0174739
GSE9891	FAM3D	NA	20	246	NA	6.47971	6.06171	0.0199519
GSE30161	FAM3D	5	1	47	7.40727	7.81647	7.20934	0.269836
GSE51088	FAM3D	3	6	100	-0.220683	-0.00449667	-0.200264	0.514331
GSE26193	FAM3D	6	8	79	5.89014	6.13007	5.91661	0.818795
GSE6008	FAM46C	8	37	41	6.82043	7.24931	7.00721	0.00709374
GSE44104	FAM46C	12	11	28	7.36718	8.49703	7.56056	0.0177204
GSE26193	FAM46C	6	8	79	6.50204	8.06247	7.1103	0.0204422
GSE9891	FAM46C	NA	20	246	NA	7.72791	7.20632	0.174762
GSE30161	FAM46C	5	1	47	4.98577	4.49428	5.62394	0.279553
GSE2109	FAM46C	9	28	81	6.67694	7.20817	6.82301	0.287103
GSE14764	FAM46C	2	6	68	6.79453	6.75178	6.71472	0.938066
GSE44104	FAM50A	12	11	28	9.56275	9.53314	9.11784	0.00819013
GSE6008	FAM50A	8	37	41	9.56433	9.08472	8.86109	0.0455153
GSE51088	FAM50A	3	6	100	0.06456	0.0379417	-0.0352978	0.140342
GSE14764	FAM50A	2	6	68	10.0221	9.29702	9.29618	0.173712
GSE2109	FAM50A	9	28	81	8.82608	8.50307	8.47178	0.36144
GSE30161	FAM50A	5	1	47	6.38074	5.84218	5.95021	0.388055
GSE9891	FAM50A	NA	20	246	NA	8.70748	8.62821	0.42142
GSE26193	FAM50A	6	8	79	8.58872	8.55368	8.53216	0.827989
GSE2109	FAM65A	9	28	81	9.05738	8.7161	8.80272	0.0276949
GSE44104	FAM65A	12	11	28	8.69804	8.37388	8.64948	0.0644031
GSE26193	FAM65A	6	8	79	8.57157	8.28703	8.52283	0.107555
GSE14764	FAM65A	2	6	68	9.80323	9.80131	10.0436	0.16517
GSE30161	FAM65A	5	1	47	6.9518	6.15025	7.042	0.23259
GSE6008	FAM65A	8	37	41	10.2988	10.2144	10.1855	0.468382
GSE9891	FAM65A	NA	20	246	NA	8.38676	8.36888	0.825376
GSE2109	FAM84B	9	28	81	9.9907	9.17638	9.81206	0.000598503
GSE44104	FAM84B	12	11	28	10.9584	9.98302	10.2682	0.0245748
GSE26193	FAM84B	6	8	79	9.76099	9.23881	9.74792	0.0738907
GSE9891	FAM84B	NA	20	246	NA	9.45699	9.73595	0.12175
GSE30161	FAM84B	5	1	47	8.05399	4.3064	7.14232	0.160688
GSE9891	FARSB	NA	20	246	NA	9.67049	9.46881	0.0267311
GSE44104	FARSB	12	11	28	9.39557	9.11044	9.19077	0.101276
GSE2109	FARSB	9	28	81	9.77165	9.4557	9.39211	0.140259
GSE26193	FARSB	6	8	79	9.50091	9.62679	9.34652	0.173083
GSE30161	FARSB	5	1	47	6.73617	6.05133	6.59271	0.606095
GSE6008	FASLG	8	37	41	7.12298	6.86607	6.82322	0.00362886
GSE2109	FASLG	9	28	81	5.05721	4.7745	4.76483	0.0433386
GSE44104	FASLG	12	11	28	4.77015	4.69223	4.5367	0.156471
GSE14764	FASLG	2	6	68	7.10113	6.92785	7.12336	0.260916
GSE26193	FASLG	6	8	79	4.95448	4.63111	4.66836	0.42155
GSE30161	FASLG	5	1	47	4.46678	4.52456	4.57635	0.850224
GSE9891	FASLG	NA	20	246	NA	4.98015	4.95215	0.872733
GSE51088	FASLG	3	6	100	0.0883633	0.05654	0.0637946	0.946319
GSE9891	FBL	NA	20	246	NA	11.0084	11.3247	0.00789114
GSE30161	FBL	5	1	47	7.7544	6.62056	7.96584	0.169875
GSE6008	FBL	8	37	41	10.9712	11.1752	11.348	0.205955
GSE26193	FBL	6	8	79	10.85	10.7333	11.0435	0.285901
GSE51088	FBL	3	6	100	-0.180923	-0.105732	-0.0651087	0.465868
GSE2109	FBL	9	28	81	10.824	10.8391	10.977	0.635807
GSE14764	FBL	2	6	68	11.3771	11.1675	11.2403	0.78089
GSE44104	FBL	12	11	28	10.8852	10.9736	10.9329	0.968014
GSE26193	FBRS	6	8	79	6.98271	6.69832	6.65302	0.0711134
[truncated: 4,711 more rows]

## Sheet: Supp Table 7 23 PFS genes,Mayo
Supplemental Table 7: Results for 23 PFS related genes with additive or interaction effects by histology for PFS (p < 0.0001) in Mayo Clinic Study
		Additive Gene Model*				Gene-Histotype Model
Gene ID	Ensembl ID	HR =exp(B)	SE(B)	gene main effect p-value	gene main effect q-value	Interaction p-value	Interaction q-value
TMEM56-RWDD3	ENSG00000271092	0.982907	0.00886816	0.0442743	0.839098	3.6e-06	0.0209678
FAM134B	ENSG00000154153	0.999089	0.000422685	0.0252134	0.789638	5.31e-06	0.0209678
CSNK1G1	ENSG00000169118	0.99961	0.000341333	0.250478	0.930484	6.82e-06	0.0209678
STIL	ENSG00000123473	0.999114	0.000415759	0.0271532	0.795795	6.94e-06	0.0209678
LIN54	ENSG00000189308	0.999545	0.000513415	0.372944	0.941604	1.13e-05	0.0209678
RAD51	ENSG00000051180	0.997644	0.00104652	0.0203251	0.771027	1.19e-05	0.0209678
TRIP4	ENSG00000103671	0.999767	0.000454177	0.607011	0.964041	1.19e-05	0.0209678
FRMD8	ENSG00000126391	0.999692	0.000208755	0.126117	0.8913	1.81e-05	0.0230978
PIP5K1C	ENSG00000186111	1.00002	0.000349079	0.950486	0.975854	1.88e-05	0.0230978
DHFR	ENSG00000228716	0.999659	0.000186876	0.0645385	0.865737	2.82e-05	0.0314617
MSH5	ENSG00000204410	0.999186	0.00303359	0.787436	0.964289	3.94e-05	0.0364735
CORO2A	ENSG00000106789	0.999785	0.000240019	0.365417	0.941165	3.95e-05	0.0364735
LINC00664	ENSG00000268658	0.996139	0.0018597	0.0299547	0.80103	4.16e-05	0.0364735
PDPK1	ENSG00000140992	0.999901	0.00022344	0.656459	0.964041	7.27e-05	0.0485473
PHAX	ENSG00000164902	1.00014	0.000391247	0.728227	0.964041	7.29e-05	0.0485473
ZNF592	ENSG00000166716	0.999796	0.000246414	0.405907	0.948245	8.02e-05	0.0485473
AAED1	ENSG00000158122	1.00005	0.000765257	0.947523	0.975854	8.23e-05	0.0485473
CCNB2	ENSG00000157456	0.999218	0.000335517	0.0173321	0.764538	9.04e-05	0.0485473
TMCO3	ENSG00000150403	0.999883	0.000198091	0.549907	0.960991	9.1e-05	0.0485473
KIF20B	ENSG00000138182	0.999218	0.000357611	0.025835	0.789638	9.24e-05	0.0485473
PEX6	ENSG00000124587	0.999735	0.000179299	0.134417	0.90087	9.78e-05	0.0485473
USP31	ENSG00000103404	0.999614	0.000456691	0.393757	0.947766	9.81e-05	0.0485473
BNIP3P17	ENSG00000271524	0.973237	0.00676953	1.72e-05	0.186422	0.82913	0.508433
*note: should not interpret additive effects when have significant interaction effects

## Sheet: Supp Table 8 Replicat PFS GEO
Supplemental Table 8: Results for 23 PFS related genes in the 5 GEO studies with outcome information. Note: not all studies had all genes, not all have all three histologies and some studies had both PFS and OS.
Study	Gene	HR for gene main effect	SE(coef)	Gene P	Interaction P	Outcome.CovariateAdjustment
GSE26193	AAED1	1.56677	0.246001	0.0618937	0.143041	PFS.stage
GSE26193	AAED1	2.05245	0.272465	0.00638358	0.691164	OS.stage
GSE30161	AAED1	0.715769	0.333263	0.297554	0.515517	OS.Nostage.NoEndo
GSE30161	AAED1	0.744004	0.281819	0.275015	0.89088	PFS.Nostage.NoEndo
GSE9891	AAED1	0.859996	0.154687	0.329668	0.618196	OS.stage.NoCC
GSE9891	AAED1	0.964138	0.11723	0.755579	0.674091	PFS.stage.NoCC
GSE14764	CCNB2	1.03582	0.268096	0.895243	0.0717174	OS.Nostage.NoCC
GSE26193	CCNB2	0.796127	0.129579	0.0891168	0.667409	PFS.stage
GSE26193	CCNB2	0.836904	0.129812	0.181925	0.238771	OS.stage
GSE30161	CCNB2	1.53598	0.231122	0.0685906	NA	OS.Nostage.NoEndo
GSE30161	CCNB2	1.40321	0.208106	0.10911	0.0752122	PFS.Nostage.NoEndo
GSE51088	CCNB2	0.511029	0.434546	0.124736	0.809117	OS.stage
GSE9891	CCNB2	1.01382	0.093063	0.882524	0.049156	OS.stage.NoCC
GSE9891	CCNB2	1.00915	0.0720532	0.899243	0.477918	PFS.stage.NoCC
GSE14764	CORO2A	1.0049	0.583602	0.993325	NA	OS.Nostage.NoCC
GSE26193	CORO2A	0.945367	0.12722	0.659869	0.0201342	PFS.stage
GSE26193	CORO2A	0.96629	0.133283	0.797254	0.0340302	OS.stage
GSE30161	CORO2A	0.78765	0.289805	0.405298	0.797785	OS.Nostage.NoEndo
GSE30161	CORO2A	0.705346	0.256612	0.169699	0.828345	PFS.Nostage.NoEndo
GSE51088	CORO2A	0.388197	0.630419	0.127511	0.571605	OS.stage
GSE9891	CORO2A	0.837088	0.105931	0.0912919	0.653291	OS.stage.NoCC
GSE9891	CORO2A	0.858683	0.0801544	0.0564707	0.810947	PFS.stage.NoCC
GSE14764	CSNK1G1	0.950704	0.944225	0.957231	NA	OS.Nostage.NoCC
GSE26193	CSNK1G1	0.595694	0.26037	0.0513705	0.0433307	PFS.stage
GSE26193	CSNK1G1	0.616431	0.286262	0.0952806	0.104664	OS.stage
GSE30161	CSNK1G1	1.21682	0.150939	0.183599	0.550378	OS.Nostage.NoEndo
GSE30161	CSNK1G1	1.31447	0.13139	0.0312076	0.151785	PFS.Nostage.NoEndo
GSE9891	CSNK1G1	1.10634	0.209694	0.631096	0.809667	OS.stage.NoCC
GSE9891	CSNK1G1	1.00793	0.152025	0.958575	0.832346	PFS.stage.NoCC
GSE14764	DHFR	1.15383	0.359041	0.692695	0.705826	OS.Nostage.NoCC
GSE26193	DHFR	0.830199	0.153785	0.230657	0.47928	PFS.stage
GSE26193	DHFR	0.874599	0.156187	0.393576	0.408758	OS.stage
GSE30161	DHFR	1.26249	0.166171	0.166735	0.237518	OS.Nostage.NoEndo
GSE30161	DHFR	1.32435	0.150125	0.0620177	0.293456	PFS.Nostage.NoEndo
GSE9891	DHFR	1.19793	0.142879	0.205248	0.861792	OS.stage.NoCC
GSE9891	DHFR	0.997032	0.113669	0.979139	0.124336	PFS.stage.NoCC
GSE14764	FAM134B	0.988899	0.411441	0.978335	0.930952	OS.Nostage.NoCC
GSE26193	FAM134B	1.17608	0.10304	0.12181	0.768246	PFS.stage
GSE26193	FAM134B	1.23243	0.106198	0.0535392	0.998685	OS.stage
GSE30161	FAM134B	1.31875	0.158856	0.0820758	0.876006	OS.Nostage.NoEndo
GSE30161	FAM134B	1.24714	0.132474	0.0979673	0.952437	PFS.Nostage.NoEndo
GSE51088	FAM134B	1.07409	0.407631	0.860801	0.210959	OS.stage
GSE9891	FAM134B	1.06921	0.0927812	0.471884	0.944363	OS.stage.NoCC
GSE9891	FAM134B	1.00257	0.0749263	0.972664	0.539112	PFS.stage.NoCC
GSE26193	FRMD8	0.733099	0.220932	0.161268	0.0820212	PFS.stage
GSE26193	FRMD8	0.691283	0.232958	0.113305	0.570907	OS.stage
GSE30161	FRMD8	1.30609	0.112848	0.0108094	0.294131	OS.Nostage.NoEndo
GSE30161	FRMD8	1.278	0.0885008	0.00328067	0.997557	PFS.Nostage.NoEndo
GSE9891	FRMD8	0.636178	0.170175	0.00852793	0.142145	OS.stage.NoCC
GSE9891	FRMD8	1.07273	0.12855	0.58409	0.0396614	PFS.stage.NoCC
GSE14764	KIF20B	2.32403	0.791481	0.280838	0.0625631	OS.Nostage.NoCC
GSE26193	KIF20B	0.802783	0.360554	0.538954	0.462399	PFS.stage
GSE26193	KIF20B	0.621965	0.375456	0.197637	0.0710573	OS.stage
GSE30161	KIF20B	0.618343	0.47754	0.310783	0.601104	OS.Nostage.NoEndo
GSE30161	KIF20B	0.715451	0.411159	0.415738	0.610757	PFS.Nostage.NoEndo
GSE51088	KIF20B	1.55541	0.8166	0.588594	0.738958	OS.stage
GSE9891	KIF20B	1.12308	0.331555	0.727244	0.162809	OS.stage.NoCC
GSE9891	KIF20B	1.1062	0.238359	0.673489	0.0867678	PFS.stage.NoCC
GSE26193	LIN54	0.876377	0.50174	0.792084	0.355597	PFS.stage
GSE26193	LIN54	0.424334	0.510343	0.0881968	0.283697	OS.stage
GSE30161	LIN54	1.04553	0.583249	0.939145	NA	OS.Nostage.NoEndo
GSE30161	LIN54	0.967958	0.497248	0.947788	0.0162508	PFS.Nostage.NoEndo
GSE9891	LIN54	1.2061	0.508472	0.713789	0.140227	OS.stage.NoCC
GSE9891	LIN54	1.17381	0.394176	0.685661	0.990788	PFS.stage.NoCC
GSE26193	LINC00664	0.739271	0.261829	0.226131	0.420593	PFS.stage
GSE26193	LINC00664	0.779537	0.286451	0.365238	0.728304	OS.stage
GSE30161	LINC00664	1.11263	0.20624	0.613525	0.568967	OS.Nostage.NoEndo
GSE30161	LINC00664	1.24513	0.196148	0.283437	0.300431	PFS.Nostage.NoEndo
GSE9891	LINC00664	0.951123	0.221216	0.819878	0.357718	OS.stage.NoCC
GSE9891	LINC00664	0.694375	0.183084	0.0377294	0.0788733	PFS.stage.NoCC
GSE14764	PDPK1	3.44135	0.876782	0.198979	NA	OS.Nostage.NoCC
GSE26193	PDPK1	0.858379	0.266056	0.567132	0.0107407	PFS.stage
GSE26193	PDPK1	0.779501	0.283451	0.381675	0.000464682	OS.stage
GSE30161	PDPK1	0.884894	0.198057	0.542169	0.662218	OS.Nostage.NoEndo
GSE30161	PDPK1	1.41727	0.219865	0.0986726	0.2893	PFS.Nostage.NoEndo
GSE9891	PDPK1	0.819273	0.259887	0.443465	0.237274	OS.stage.NoCC
GSE9891	PDPK1	0.886867	0.194481	0.537836	0.837825	PFS.stage.NoCC
GSE14764	PEX6	1.15649	0.367396	0.693991	NA	OS.Nostage.NoCC
GSE26193	PEX6	0.903798	0.119537	0.40019	0.00223445	PFS.stage
GSE26193	PEX6	0.852585	0.126633	0.211036	0.00119184	OS.stage
GSE30161	PEX6	1.20382	0.337609	0.581042	NA	OS.Nostage.NoEndo
GSE30161	PEX6	1.13476	0.267559	0.63596	0.361917	PFS.Nostage.NoEndo
GSE51088	PEX6	0.664012	0.574719	0.476719	0.715334	OS.stage
GSE9891	PEX6	0.796572	0.103213	0.0285354	0.90059	OS.stage.NoCC
GSE9891	PEX6	0.936278	0.0840071	0.434303	0.156851	PFS.stage.NoCC
GSE26193	PHAX	0.954081	0.185553	0.800065	0.209915	PFS.stage
GSE26193	PHAX	0.759973	0.182896	0.134149	0.162753	OS.stage
GSE30161	PHAX	1.21181	0.112641	0.0873168	NA	OS.Nostage.NoEndo
GSE30161	PHAX	1.21911	0.090737	0.0285932	0.233859	PFS.Nostage.NoEndo
GSE51088	PHAX	0.344941	1.05	0.312306	0.35542	OS.stage
GSE9891	PHAX	1.13874	0.149217	0.379555	0.910727	OS.stage.NoCC
GSE9891	PHAX	1.12886	0.110628	0.268684	0.573566	PFS.stage.NoCC
GSE14764	PIP5K1C	2.35455	0.678659	0.209734	NA	OS.Nostage.NoCC
GSE26193	PIP5K1C	0.806575	0.385346	0.578463	0.129961	PFS.stage
GSE26193	PIP5K1C	1.27642	0.387595	0.526959	0.0867509	OS.stage
GSE30161	PIP5K1C	0.316827	0.499658	0.0187858	0.344195	OS.Nostage.NoEndo
GSE30161	PIP5K1C	0.365114	0.383165	0.00835193	0.652863	PFS.Nostage.NoEndo
GSE9891	PIP5K1C	1.35954	0.346566	0.377223	0.435552	OS.stage.NoCC
GSE9891	PIP5K1C	1.44158	0.273218	0.183457	0.206498	PFS.stage.NoCC
GSE14764	RAD51	1.24803	0.598931	0.708192	0.294352	OS.Nostage.NoCC
GSE26193	RAD51	0.611681	0.20959	0.0178505	0.187925	PFS.stage
GSE26193	RAD51	0.608502	0.21725	0.021626	0.176229	OS.stage
GSE30161	RAD51	0.716036	0.336605	0.296327	0.31376	OS.Nostage.NoEndo
GSE30161	RAD51	0.740479	0.286491	0.275012	0.99197	PFS.Nostage.NoEndo
GSE51088	RAD51	0.627139	0.44303	0.296943	0.860154	OS.stage
GSE9891	RAD51	0.926857	0.127672	0.552289	NA	OS.stage.NoCC
GSE9891	RAD51	0.896568	0.104883	0.298079	0.249851	PFS.stage.NoCC
GSE14764	STIL	1.43563	0.335067	0.29345	0.486874	OS.Nostage.NoCC
GSE26193	STIL	0.658197	0.165284	0.011385	0.699011	PFS.stage
GSE26193	STIL	0.737896	0.171976	0.0776789	0.461266	OS.stage
GSE30161	STIL	1.40385	0.187749	0.068695	0.208082	OS.Nostage.NoEndo
GSE30161	STIL	1.27919	0.166229	0.13721	0.694433	PFS.Nostage.NoEndo
GSE9891	STIL	0.951429	0.110387	0.652737	0.248595	OS.stage.NoCC
GSE9891	STIL	0.893321	0.0915934	0.219987	0.403011	PFS.stage.NoCC
GSE14764	TMCO3	0.736086	0.396945	0.436454	0.839565	OS.Nostage.NoCC
GSE26193	TMCO3	0.974032	0.163543	0.872354	0.711498	PFS.stage
GSE26193	TMCO3	0.754126	0.168509	0.0963127	0.739244	OS.stage
GSE30161	TMCO3	1.47415	0.191472	0.0393901	0.77494	OS.Nostage.NoEndo
GSE30161	TMCO3	1.47262	0.165048	0.0176036	0.877852	PFS.Nostage.NoEndo
GSE9891	TMCO3	1.41576	0.146077	0.0174123	0.357987	OS.stage.NoCC
GSE9891	TMCO3	1.03988	0.111659	0.72615	0.198544	PFS.stage.NoCC
GSE14764	TRIP4	0.671985	0.488721	0.413775	0.154056	OS.Nostage.NoCC
GSE26193	TRIP4	0.89456	0.270771	0.681471	0.309075	PFS.stage
GSE26193	TRIP4	0.761119	0.281437	0.335441	0.23656	OS.stage
GSE30161	TRIP4	1.04097	0.182218	0.824622	0.603342	OS.Nostage.NoEndo
GSE30161	TRIP4	1.2688	0.151428	0.102535	0.481057	PFS.Nostage.NoEndo
GSE51088	TRIP4	0.448133	1.0683	0.457954	0.538801	OS.stage
GSE9891	TRIP4	1.5426	0.211235	0.0340035	0.702499	OS.stage.NoCC
GSE9891	TRIP4	1.32231	0.148887	0.0522029	0.177115	PFS.stage.NoCC
GSE26193	USP31	0.987753	0.215918	0.954451	0.0357361	PFS.stage
GSE26193	USP31	0.820997	0.23113	0.38783	0.00180912	OS.stage
GSE30161	USP31	0.896234	0.386116	0.776078	0.584893	OS.Nostage.NoEndo
GSE30161	USP31	0.887811	0.385501	0.756568	0.143364	PFS.Nostage.NoEndo
GSE51088	USP31	1.09349	1.29157	0.944908	0.972981	OS.stage
GSE9891	USP31	0.840552	0.137834	0.210795	0.304468	OS.stage.NoCC
GSE9891	USP31	0.868586	0.115804	0.224972	0.159585	PFS.stage.NoCC
GSE14764	ZNF592	0.622684	0.75542	0.522749	NA	OS.Nostage.NoCC
GSE26193	ZNF592	1.18487	0.372677	0.649457	0.175416	PFS.stage
GSE26193	ZNF592	1.36531	0.394033	0.430475	0.340493	OS.stage
GSE30161	ZNF592	1.43788	0.360156	0.303412	0.300298	OS.Nostage.NoEndo
GSE30161	ZNF592	1.81039	0.313156	0.0515039	0.304218	PFS.Nostage.NoEndo
GSE9891	ZNF592	0.819895	0.268817	0.455421	0.276032	OS.stage.NoCC
GSE9891	ZNF592	0.86003	0.213503	0.477408	0.859012	PFS.stage.NoCC

## Sheet: Supp Table 9 IHC Genes
Supplemental Table 9: Association of 8 genes with histotypes in the Mayo Clinic Study known to be related to histologies by IHC studies by independent IHC studies.
HGNC.symbol	mean.HGSC	mean.EC	mean.CC	KW.p	HGSC.EC.p	HGSC.CC.p	EC.CC.p
VIM	23668.8	27679.8	31968.6	0.028737	0.581191	0.004847	0.073775
PGR	763.452	2924.47	-46.1206	2.6e-10	1.4e-08	0.004653	6.76e-07
ARID1A	2859.07	3002.89	3789.32	0.009265	0.305376	0.003134	0.017221
NAPSA	117.498	82.2274	2207.98	6.97e-12	0.359664	3.54e-12	1.29e-10
TP53	1805.93	1818.65	2346.45	0.251118	0.785301	0.095573	0.175441
CDKN2A	863.343	2588.88	2254.43	1.58e-12	2.19e-12	0.000216	0.319207
TFF3	674.279	1321.83	-461.556	9.44e-09	0.004809	1.15e-07	2.91e-07
WT1	3338.51	4633.79	3630.86	0.009526	0.002254	0.714349	0.149431
